# Supplementary material for: Incidence and seroprevalence of rabies virus in humans, dogs and other animal species in Africa, a systematic review and meta-analysis
Source: PubMed Central journal article supplement — One Health. 2021 Jun 26;13:100285. doi: 10.1016/j.onehlt.2021.100285 (PMC8254041; doi:10.1016/j.onehlt.2021.100285), 2021-06-26

# Supplementary Figure 4: Funnel plot for publication for Rabies virus incidence in dogs in Africa

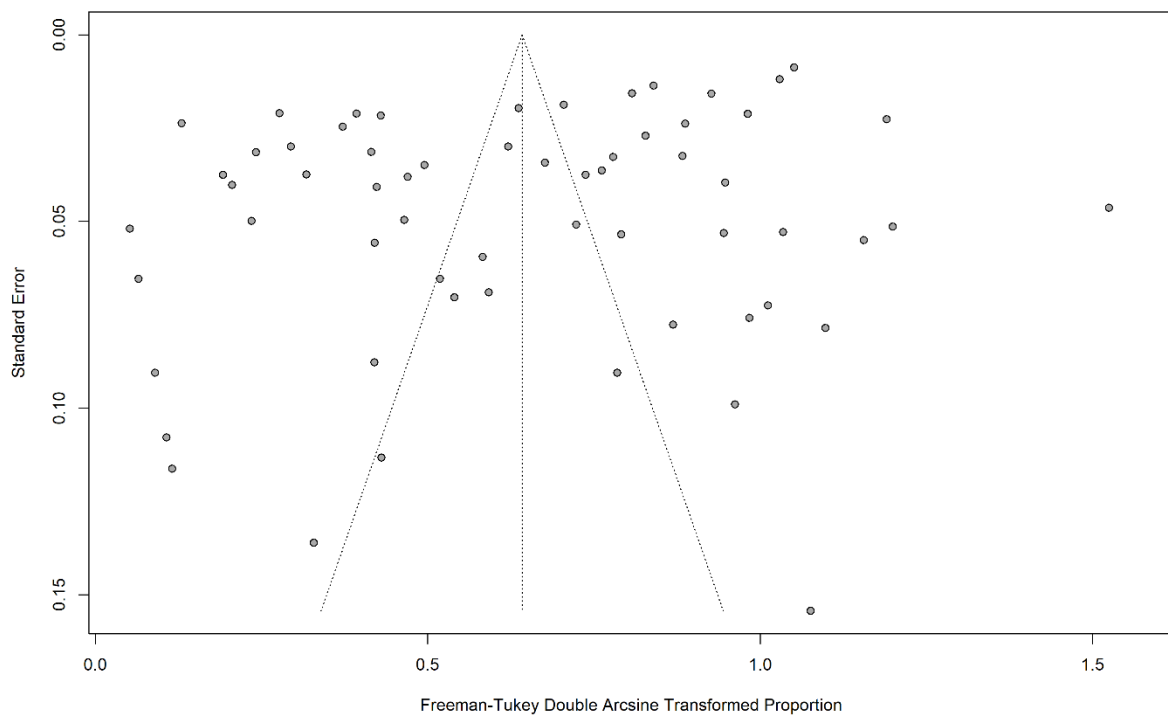

Supplement: mmc4.pdf [file mmc4.pdf]
