# Supplementary material for: Incidence and seroprevalence of rabies virus in humans, dogs and other animal species in Africa, a systematic review and meta-analysis
Source: PubMed Central journal article supplement — One Health. 2021 Jun 26;13:100285. doi: 10.1016/j.onehlt.2021.100285 (PMC8254041; doi:10.1016/j.onehlt.2021.100285), 2021-06-26
Supplement: mmc9.pdf [file mmc9.pdf]

Supplementary Table 3. Items for risk of bias assessment

| <b>Hoy et al. tool for cross sectional studies</b>                                                                                                 | <b>Yes (1)/No (0)</b> |
|----------------------------------------------------------------------------------------------------------------------------------------------------|-----------------------|
| <b>External validity</b>                                                                                                                           |                       |
| 1. Was the study's target population a close representation of the national population in relation to Rabies virus prevalence?                     | <b>1</b>              |
| 2. Was the sampling frame a true or close representation of the study population?                                                                  | <b>1</b>              |
| 3. Was some form of random selection used to select the sample, OR was a census undertaken?                                                        | <b>1</b>              |
| 4. Was the likelihood of nonresponse bias minimal (> 70%)?                                                                                         | <b>1</b>              |
| <b>Internal validity</b>                                                                                                                           | <b>1</b>              |
| 5. Were data collected directly from the subjects (as opposed to a proxy)?                                                                         | <b>1</b>              |
| 6. Was an acceptable case definition used in the study?                                                                                            | <b>1</b>              |
| 7. Was the study viral detection assay shown to have validity and reliability?                                                                     | <b>1</b>              |
| 8. Was the same mode type of sample collected for all subjects?                                                                                    | <b>1</b>              |
| 9. Was the length of the length of the study period > 1 year?                                                                                      | <b>1</b>              |
| 10. Were the numerator(s) and denominator(s) for the Lassa virus prevalence or case fatality rate appropriate?                                     | <b>1</b>              |
| Total score                                                                                                                                        | <b>10</b>             |
| <b>Interpretation of the risk of bias tool</b>                                                                                                     |                       |
| <ul style="list-style-type: none"> <li>• 7-10: Low risk of bias</li> <li>• 4-6: Moderate risk of bias</li> <li>• 0-3: High risk of bias</li> </ul> |                       |
