# Supplementary material for: Incidence and seroprevalence of rabies virus in humans, dogs and other animal species in Africa, a systematic review and meta-analysis
Source: PubMed Central journal article supplement — One Health. 2021 Jun 26;13:100285. doi: 10.1016/j.onehlt.2021.100285 (PMC8254041; doi:10.1016/j.onehlt.2021.100285), 2021-06-26
Supplement: mmc10.pdf [file mmc10.pdf]

Supplementary Table 4. Main reasons of exclusion of eligible studies

| N° | Author, Year         | Title                                                                                                                                                              | Reason of exclusion                             |
|----|----------------------|--------------------------------------------------------------------------------------------------------------------------------------------------------------------|-------------------------------------------------|
| 1  | Abubakar, 2012       | Incidence of dog bite injuries and clinical rabies in a tertiary health care institution: A 10-year retrospective study                                            | No data on RABV prevalence                      |
| 2  | Adeiga, 2002         | MOLECULAR STUDY OF NUCLEPROTEIN GENE OF RABIES VIRUS ISOLATES FROM DOG BRAINS                                                                                      | Only RABV positive samples included             |
| 3  | Adomako, 2018        | Dog bites and rabies in the Eastern Region of Ghana in 2013-2015: A call for a one-health approach                                                                 | No data on RABV prevalence                      |
| 4  | Afakye, 2016         | Household exposure and animal-bite surveillance following human rabies detection in Southern Ghana                                                                 | No data on RABV prevalence                      |
| 5  | Aghahowa, 2010       | Incidence of dog bite and anti-rabies vaccine utilization in the, University of Benin Teaching Hospital, Benin City, Nigeria: A 12-year assessment                 | No data on RABV prevalence                      |
| 6  | Aghomo, 1990         | Further studies on rabies virus isolated from healthy dogs in Nigeria                                                                                              | Not possible to extract data on RABV prevalence |
| 7  | Aghomo, 1990         | Antigenic characterisation of virus isolates from vaccinated dogs dying of rabies                                                                                  | Sample size < or = 10 participants              |
| 8  | Ahmad, 2017          | First confirmation of rabies in Zamfara State, Nigeria-in a sheep                                                                                                  | Case report                                     |
| 9  | Ahmad, 2018          | Human death from suspected rabid dog bite in Zamfara State, Nigeria                                                                                                | Case report                                     |
| 10 | Ahmadu, 1998         | Rabies in a Zambian bat                                                                                                                                            | No full text                                    |
| 11 | Akafekwa, 1976       | Rabies in Zambia                                                                                                                                                   | No full text                                    |
| 12 | Al Abaidani, 2015    | Epidemiology of rabies in Oman: A retrospective study (1991–2013)                                                                                                  | Data outside of Africa                          |
| 13 | Ali, 2002            | Outbreak of rabies in South Darfur, Sudan                                                                                                                          | Not possible to extract data on RABV prevalence |
| 14 | Allen, 2013          | A retrospective study of brain lesions in goats submitted to three veterinary diagnostic laboratories                                                              | Data outside of Africa                          |
| 15 | Alonge, 1984         | Rabies in Ghana, West Africa                                                                                                                                       | No full text                                    |
| 16 | Amouri, 2011         | Molecular characterization of rabies virus isolated from dogs in Tunisia: Evidence of two phylogenetic variants                                                    | No data on RABV prevalence                      |
| 17 | Anderson, 1984       | Human rabies in the United States, 1960 to 1979: Epidemiology, diagnosis, and prevention                                                                           | Data outside of Africa                          |
| 18 | Andriamandimby, 2013 | Surveillance and control of rabies in La Reunion, Mayotte, and Madagascar                                                                                          | Review                                          |
| 19 | Antunes, 2019        | Spatio-temporal study of diagnosis of rabies in vampire bats in sergipe (Brazil), between 1987 and 2014                                                            | Data outside of Africa                          |
| 20 | Awah, 2002           | Canine and Human Rabies in Cameroon                                                                                                                                | Not possible to extract data on RABV prevalence |
| 21 | Awah-Ndukum, 2003    | Ecological aspects of dogs in relation to rabies control and public health significance in North-west Cameroon                                                     | Comment on an article                           |
| 22 | Babaniyi, 2016       | Epidemiological characteristics of rabies in Zambia: A retrospective study (2004-2013)                                                                             | Not possible to extract data on RABV prevalence |
| 23 | Baer, 1977           | Characteristics of 11 rabies virus isolates in mice: titers and relative invasiveness of virus, incubation period of infection, and survival of mice with sequelae | Data outside of Africa                          |
| 24 | Bah, 1981            | Reservoir of camel rabies in Mauritania                                                                                                                            | No full text                                    |

|    |                    |                                                                                                                                                             |                                                 |
|----|--------------------|-------------------------------------------------------------------------------------------------------------------------------------------------------------|-------------------------------------------------|
| 25 | Bahloul, 2005      | Comparative evaluation of specific ELISA and RFFIT antibody assays in the assessment of dog immunity against rabies                                         | No data on RABV prevalence                      |
| 26 | Balako, 2018       | Rabies Outbreak among Livestock in a Pastoralist Community, Southern Ethiopia                                                                               | Case report                                     |
| 27 | Baldi, 2019        | Leptospira Seroprevalence Detection and Rabies Virus Absence in an Urban Raccoon ( <i>Procyon lotor</i> ) Population in a Highly Populated Area, Costa Rica | Data outside of Africa                          |
| 28 | Balint, 1976       | Rabies in Zambian children                                                                                                                                  | Only RABV positive samples included             |
| 29 | Banerjee, 1970     | The incidence and diagnosis of rabies in Nigeria                                                                                                            | No full text                                    |
| 30 | Barnard, 1979      | The role played by wildlife in the epizootiology of rabies in South Africa and South-West Africa                                                            | Only RABV positive samples included             |
| 31 | Barnard, 1981      | Rabies in kudu ( <i>Tragelaphus strepsiceros</i> ) in South West Africa/Namibia                                                                             | Not possible to extract data on RABV prevalence |
| 32 | Bayyappa, 2014     | Wild animal rabies in India: Possibility of species spill over                                                                                              | Data outside of Africa                          |
| 33 | Beck, 2017         | Pathobiological investigation of naturally infected canine rabies cases from Sri Lanka                                                                      | Data outside of Africa                          |
| 34 | Bello, 2007        | A Fifteen-Year Retrospective Study Of The Prevalence Of Rabies In Bauchi State, Nigeria                                                                     | Laboratory assays used unclear or not reported  |
| 35 | Belludi, 2017      | Post-exposure prophylaxis for animal bites: A low cost model for enhancing reach and affordability of biologicals in high burden countries                  | No data on RABV prevalence                      |
| 36 | Ben Néfissa, 2007  | Rabies in Tunisia during the 19th century: case increase or disease emergence?                                                                              | Not possible to extract data on RABV prevalence |
| 37 | Ben Salem, 1999    | Exposure to rabies in Monastir (Tunisia): Assessing the quality of care                                                                                     | No data on RABV prevalence                      |
| 38 | Benelmouffok, 1982 | Epidemiology of rabies in Algeria                                                                                                                           | No full text                                    |
| 39 | Benelmouffok, 1982 | Rabies in Algeria Recrudescence and new epizootic aspect                                                                                                    | Laboratory assays used unclear or not reported  |
| 40 | Berry, 1993        | Surveillance and control of anthrax and rabies in wild herbivores and carnivores in Namibia                                                                 | No data on RABV prevalence                      |
| 41 | Beyene, 2018       | Estimating the burden of rabies in Ethiopia by tracing dog bite victims                                                                                     | No data on RABV prevalence                      |
| 42 | Bingham, 1993      | Jackal rabies in Zimbabwe                                                                                                                                   | No data on RABV prevalence                      |
| 43 | Bingham, 1994      | Rabies incubation in an African civet ( <i>Civettictis civetta</i> )                                                                                        | No full text                                    |
| 44 | Bingham, 1999      | The epidemiology of rabies in Zimbabwe 1 Rabies in dogs ( <i>Canis familiaris</i> )                                                                         | Only RABV positive samples included             |
| 45 | Bingham, 1999      | The epidemiology of rabies in Zimbabwe 2 Rabies in jackals ( <i>Canis adustus</i> and <i>Canis mesomelas</i> )                                              | Only RABV positive samples included             |
| 46 | Bingham, 2001      | Report of isolations of unusual lyssaviruses (rabies and Mokola virus) identified retrospectively from Zimbabwe                                             | Only RABV positive samples included             |
| 47 | Blenden, 1986      | Use of immunofluorescence examination to detect rabies virus antigen in the skin of humans with clinical encephalitis                                       | Data outside of Africa                          |
| 48 | Bloch, 1995        | A probable outbreak of rabies in a group of camels in Niger                                                                                                 | Sample size < or = 10 participants              |

|    |                            |                                                                                                                                  |                                                 |
|----|----------------------------|----------------------------------------------------------------------------------------------------------------------------------|-------------------------------------------------|
| 49 | Bolajoko, 2019             | Assessment of risk factors responsible for canine rabies in Oyo State, Nigeria                                                   | No data on RABV prevalence                      |
| 50 | Botros, 1976               | Rabies in Egypt: biological and antigenic properties of four viruses recovered from nonclassical rabies cases                    | No full text                                    |
| 51 | Botros, 1977               | Rabies in the Arab Republic of Egypt: III Enzootic rabies in wildlife                                                            | Laboratory assays used unclear or not reported  |
| 52 | Botros, 1977               | Rabies in the Arab republic of Egypt A study of forty human cases                                                                | No full text                                    |
| 53 | Botros, 1979               | A study to evaluate non-fatal rabies in animals                                                                                  | No full text                                    |
| 54 | Bouchrit , 2002            | Determining factors for human rabies in Morocco: Genetic variability, vaccine quality, or inadequate management                  | No data on RABV prevalence                      |
| 55 | Bourhy, 1988               | Rabies in vaccinated dogs in Gabon                                                                                               | No full text                                    |
| 56 | Bouskraoui, 1997           | Rabies in children A review of eleven cases                                                                                      | No full text                                    |
| 57 | Brückner , 1978            | The epidemiology and control of rabies in South Africa                                                                           | No full text                                    |
| 58 | Brückner, 1978             | Field observations on the occurrence of rabies in cattle in the magisterial districts of Soutpansberg and Messina                | No full text                                    |
| 59 | Burrows , 1994             | Rabies in African wild dogs of Tanzania                                                                                          | No data on RABV prevalence                      |
| 60 | Burrows, 1992              | Rabies in wild dogs                                                                                                              | No data on RABV prevalence                      |
| 61 | Bwangamoi, 1991            | Rabies, Microbesnoitosis and Sarcosystosis in a Lioness From Nairobi National Park                                               | No full text                                    |
| 62 | Byaruhanga, 2017           | Retrospective study on cattle and poultry diseases in Uganda                                                                     | Not possible to extract data on RABV prevalence |
| 63 | Cassel-Beraud , 1989       | Evaluation of 30-year-activity of the Virology Laboratory of the Pasteur Institute in Madagascar (1958-1987)                     | No data on RABV prevalence                      |
| 64 | Centers for disease , 1982 | Human rabies--Rwanda                                                                                                             | No full text                                    |
| 65 | Centers for Disease, 1983  | Human rabies--Kenya                                                                                                              | Case report                                     |
| 66 | Chadli, 1982               | Epidemiology of rabies in Tunisia Comparative study of results from the last 28 years                                            | No full text                                    |
| 67 | Chadli, 1982               | The reservoir of rabies virus in Tunisia                                                                                         | No full text                                    |
| 68 | Chadli, 1986               | Rabies in Tunisia Analysis of the results of the last 34 years                                                                   | No full text                                    |
| 69 | Chadli, 1988               | Rabies in Tunisia A comparative study of results from the last 36 years                                                          | No full text                                    |
| 70 | Chambron, 1967             | Rabies in a captive wart-hog in Senegal                                                                                          | Case report                                     |
| 71 | Chitanga, 2017             | Identification and genetic characterization of tick-borne zoonotic Anaplasma species in dogs in Lusaka, Zambia                   | No data on RABV prevalence                      |
| 72 | Cleveland, 1995            | Maintenance of a microparasite infecting several host species: Rabies in the Serengeti                                           | Not possible to extract data on RABV prevalence |
| 73 | Coertse, 2010              | Improved PCR methods for detection of african rabies and rabies-related lyssaviruses                                             | No data on RABV prevalence                      |
| 74 | Coertse, 2019              | Reverse transcription recombinase polymerase amplification assay for rapid detection of canine associated rabies virus in Africa | Sample with already known result                |
| 75 | Coetzee, 2008              | Use of a molecular epidemiological database to track human rabies case histories in South Africa                                 | No data on RABV prevalence                      |
| 76 | Coetzer, 2017              | Enhanced diagnosis of rabies and molecular evidence for the transboundary spread of the disease in Mozambique                    | Sample with already known result                |

|     |                  |                                                                                                                                                                   |                                                |
|-----|------------------|-------------------------------------------------------------------------------------------------------------------------------------------------------------------|------------------------------------------------|
| 77  | Coetzer, 2019    | Epidemiological aspects of the persistent transmission of rabies during an outbreak (2010 – 2017) in Harare, Zimbabwe                                             | Duplicate study                                |
| 78  | Cohen, 2007      | Epidemiology and molecular virus characterization of reemerging rabies, South Africa                                                                              | No data on RABV prevalence                     |
| 79  | Coulanges, 1982  | Epidemiology of rabies in Madagascar                                                                                                                              | No full text                                   |
| 80  | Coulibaly, 2000  | Prevalence and control of zoonotic diseases: Collaboration between public health workers and veterinarians in Burkina Faso                                        | Laboratory assays used unclear or not reported |
| 81  | Coulon, 1982     | Antigenic variants of the rabies virus Selection with antiglycoprotein monoclonal antibodies                                                                      | No full text                                   |
| 82  | courtain, 2000   | Temporal patterns of domestic and wildlife rabies in central Namibia stock-ranching area, 1986-1996                                                               | No data on RABV prevalence                     |
| 83  | Dacheux, 2008    | A reliable diagnosis of human rabies based on analysis of skin biopsy specimens                                                                                   | Sample size < or = 10 participants             |
| 84  | Dacheux, 2010    | More accurate insight into the incidence of human rabies in developing countries through validated laboratory techniques                                          | No data on RABV prevalence                     |
| 85  | Dacheux, 2016    | Dual Combined Real-Time Reverse Transcription Polymerase Chain Reaction Assay for the Diagnosis of Lyssavirus Infection                                           | Sample with already known result               |
| 86  | Davis, 2007      | The evolutionary dynamics of canid and mongoose rabies virus in southern Africa                                                                                   | Only RABV positive samples included            |
| 87  | De Nardo, 2018   | A retrospective evaluation of bites at risk of rabies transmission across 7 years: The need to improve surveillance and reporting systems for rabies elimination  | No data on RABV prevalence                     |
| 88  | De Ory, 2013     | Viral infections of the central nervous system in Spain: A prospective study                                                                                      | Data outside of Africa                         |
| 89  | Dedkov, 2016     | Retrospective diagnosis of two rabies cases in humans by high throughput sequencing                                                                               | Data outside of Africa                         |
| 90  | Depoux, 1958     | Rabies in French Equatorial Africa during the past five years I Activities of the Pasteur Institute of Brazzaville in the detection of rabies                     | No full text                                   |
| 91  | Diallo, 2019     | Human rabies post exposure prophylaxis at the Pasteur Institute of Dakar, Senegal: Trends and risk factors                                                        | No data on RABV prevalence                     |
| 92  | Diop, 2007       | The point on human rabies in Senegal from 1986 to 2005                                                                                                            | Sample with already known result               |
| 93  | Doerge, 1974     | Evidence for inapparent rabies infection                                                                                                                          | Data outside of Africa                         |
| 94  | Durojaiye, 1984  | Viral zoonoses in Nigeria: (I) Rabies                                                                                                                             | No full text                                   |
| 95  | Dzikwi, 2010     | Serological Surveillance for Non-Rabies Lyssaviruses among Apparently Healthy Dogs in Zaria, Nigeria                                                              | No data on RABV prevalence                     |
| 96  | Ebuy, 2019       | Community knowledge, attitude and practice on rabies, incidence in humans and animals and risk factors to rabies in selected districts of Tigray Region, Ethiopia | No data on RABV prevalence                     |
| 97  | Edelsten, 1995   | Epidemiology and control of rabies in Malawi                                                                                                                      | Sample with already known result               |
| 98  | Eggerbauer, 2014 | Evaluation of Six Commercially Available Rapid Immunochromatographic Tests for the Diagnosis of Rabies in Brain Material                                          | Sample with already known result               |
| 99  | Ehizibolo, 2008  | Diagnosis of canine rabies by the direct fluorescent antibody technique in Plateau State, Nigeria                                                                 | Duplicate study                                |
| 100 | Ekanem, 2013     | Stray dog trade fuelled by dog meat consumption as a risk factor for rabies infection in Calabar, southern Nigeria                                                | Sample with already known result               |

|     |                   |                                                                                                                                                              |                                                 |
|-----|-------------------|--------------------------------------------------------------------------------------------------------------------------------------------------------------|-------------------------------------------------|
| 101 | Eke, 2015         | Human rabies: still a neglected preventable disease in Nigeria                                                                                               | Laboratory assays used unclear or not reported  |
| 102 | Elegbeleye, 1975  | Rabies in Lagos, Nigeria                                                                                                                                     | No full text                                    |
| 103 | El-Tholoth, 2015  | Identification and genetic characterization of rabies virus from Egyptian water buffaloes ( <i>Bubalus bubalis</i> ) bitten by a fox                         | Sample size < or = 10 participants              |
| 104 | Enurah, 1988      | Rabies in a civet cat ( <i>Civettictis civetta</i> ) in the Jos Zoo, Nigeria                                                                                 | Case report                                     |
| 105 | Esterhuysen, 1995 | A liquid-phase blocking ELISA for the detection of antibodies to rabies virus                                                                                | No data on RABV prevalence                      |
| 106 | Eze, 2020         | Molecular Detection of Rabies Lyssaviruses from Dogs in Southeastern Nigeria: Evidence of Transboundary Transmission of Rabies in West Africa                | Duplicate study                                 |
| 107 | Fagbami, 1981     | Hospital records of human rabies and antirabies prophylaxis in Nigeria 1969-78                                                                               | Sample with already known result                |
| 108 | Faizee, 2012      | Pathological, Immunological and Molecular Diagnosis of Rabies in Clinically Suspected Animals of Different Species Using Four Detection Techniques in Jordan | Data outside of Africa                          |
| 109 | Faouzi, 2009      | Genetic diversity of human rabies virus isolated during 2000-2008 in Morocco                                                                                 | No full text                                    |
| 110 | Farahtaj, 2014    | Human rabies in Iran                                                                                                                                         | Data outside of Africa                          |
| 111 | Fassi-Fehri, 1968 | Remarks on the epidemiology of rabies in Morocco                                                                                                             | No full text                                    |
| 112 | Fekadu, 1972      | Atypical rabies in dogs in Ethiopia                                                                                                                          | No full text                                    |
| 113 | Fekadu, 1982      | Excretion of rabies virus in the saliva of dogs                                                                                                              | No data on RABV prevalence                      |
| 114 | Fekadu, 1982      | Rabies in Ethiopia                                                                                                                                           | No data on RABV prevalence                      |
| 115 | Fèvre, 2005       | The epidemiology of animal bite injuries in Uganda and projections of the burden of rabies                                                                   | Not possible to extract data on RABV prevalence |
| 116 | Foggin, 1979      | Rabies in Rhodesia: The current situation                                                                                                                    | Only RABV positive samples included             |
| 117 | Foggin, 1982      | Atypical rabies virus in cats and a dog in Zimbabwe                                                                                                          | No full text                                    |
| 118 | Frey, 2013        | Survey of animal bite injuries and their management for an estimate of human rabies deaths in N'Djaména, Chad                                                | Not possible to extract data on RABV prevalence |
| 119 | Gadre, 2010       | Rabies viral encephalitis: Clinical determinants in diagnosis with special reference to paralytic form                                                       | Data outside of Africa                          |
| 120 | Garba, 2010       | Rabies virus antigen in the brain of apparently healthy slaughtered dogs in Sokoto and Katsina States, Nigeria                                               | Duplicate study                                 |
| 121 | Gascoyne, 1993    | Rabies in African wild dogs ( <i>Lycaon pictus</i> ) in the Serengeti region, Tanzania                                                                       | Not possible to extract data on RABV prevalence |
| 122 | Gautret, 2015     | Animal-associated exposure to rabies virus among travelers, 1997–2012                                                                                        | Not possible to extract data on RABV prevalence |
| 123 | Gebru, 2019       | Risk factors and spatio-temporal patterns of human rabies exposure in northwestern tigray, ethiopia                                                          | No data on RABV prevalence                      |
| 124 | Georges, 1982     | Epidemiology of rabies in the Central African Republic                                                                                                       | No full text                                    |
| 125 | Ghanghro, 2014    | Epidemiology of dog bites during floods in District Naushahro Feroze, Sind, Pakistan, 2010                                                                   | No data on RABV prevalence                      |
| 126 | Ghiwot, 2016      | Community health seeking behavior for suspected human and animal rabies cases, Gomma district, southwest Ethiopia                                            | No data on RABV prevalence                      |

|     |                  |                                                                                                                                                                                     |                                                 |
|-----|------------------|-------------------------------------------------------------------------------------------------------------------------------------------------------------------------------------|-------------------------------------------------|
| 127 | Gnanadurai, 2013 | Presence of Virus Neutralizing Antibodies in Cerebral Spinal Fluid Correlates with Non-Lethal Rabies in Dogs                                                                        | No data on RABV prevalence                      |
| 128 | Gum, 2019        | Assessment of retrospective rabies suspected cases registered at two hospitals, community and traditional healers' knowledge, attitude and practices in south Ethiopian pastoralist | No data on RABV prevalence                      |
| 129 | Gumi, 2017       | Rabies outbreak in village livestock and lack of post exposure vaccine seeking behavior in South Oromia pastoralist, Ethiopia                                                       | No data on RABV prevalence                      |
| 130 | Gummow, 1986     | Rabies in South Africa: epidemiological trends for the period 1980-1984                                                                                                             | Not possible to extract data on RABV prevalence |
| 131 | Gummow, 2010     | Rabies in South Africa between 1993 and 2005--what has been achieved?                                                                                                               | Only RABV positive samples included             |
| 132 | Hameid, 1991     | Rabies in Sudan: an epidemiological review                                                                                                                                          | No full text                                    |
| 133 | Hamir, 1990      | Absence of rabies encephalitis in a raccoon with concurrent rabies and canine distemper infections                                                                                  | Case report                                     |
| 134 | Hampson, 2008    | Rabies exposures, post-exposure prophylaxis and deaths in a region of endemic canine rabies                                                                                         | No data on RABV prevalence                      |
| 135 | Hananeh, 2015    | Pathological and molecular diagnosis of rabies in clinically suspected food animals using different diagnostic tests                                                                | Data outside of Africa                          |
| 136 | Harbi, 1976      | The incidence of rabies in animals in the Sudan                                                                                                                                     | No full text                                    |
| 137 | Harvey, 2014     | Possible rabies exposures in peace corps volunteers, 2011                                                                                                                           | No data on RABV prevalence                      |
| 138 | Hassan, 1984     | A five-year analysis of diseases of dogs and cats in the Veterinary Clinic of Freetown, Sierra Leone                                                                                | Laboratory assays used unclear or not reported  |
| 139 | Hatch, 2004      | A descriptive study of urban rabies during the civil war in Sierra Leone: 1995-2001                                                                                                 | Not possible to extract data on RABV prevalence |
| 140 | Hayman, 2011     | Evolutionary history of rabies in Ghana                                                                                                                                             | Not possible to extract data on RABV prevalence |
| 141 | Hercules, 2018   | Rabies in a Dog Imported from Egypt - Connecticut, 2017                                                                                                                             | Case report                                     |
| 142 | Hergert, 2013    | Dog Bite Histories and Response to Incidents in Canine Rabies-Enzootic KwaZulu-Natal, South Africa                                                                                  | No data on RABV prevalence                      |
| 143 | Hergert, 2016    | Risk factors associated with nonvaccination rabies status of dogs in KwaZulu-Natal, South Africa                                                                                    | No data on RABV prevalence                      |
| 144 | Hirano, 2010     | Molecular epidemiology of rabies virus isolates in Uganda                                                                                                                           | Only RABV positive samples included             |
| 145 | Hofmeyr, 2000    | Rabies in African wild dogs ( <i>Lycaon pictus</i> ) in the Madikwe Game Reserve, South Africa                                                                                      | Sample size < or = 10 participants              |
| 146 | Horton, 2013     | Rabies in Iraq: Trends in Human Cases 2001-2010 and Characterisation of Animal Rabies Strains from Baghdad                                                                          | Data outside of Africa                          |
| 147 | Horton, 2015     | Complex Epidemiology of a Zoonotic Disease in a Culturally Diverse Region: Phylogeography of Rabies Virus in the Middle East                                                        | No data on RABV prevalence                      |
| 148 | Howell, 1976     | Rabies in rodents and lagomorphs                                                                                                                                                    | No full text                                    |
| 149 | Hübschle, 1988   | Rabies in the kudu antelope ( <i>Tragelaphus strepsiceros</i> )                                                                                                                     | No data on RABV prevalence                      |
| 150 | Iroegbu, 1992    | Incidence of rabies virus complement-fixing antibodies in unvaccinated dogs, humans and livestock in Anambra State of Nigeria                                                       | No full text                                    |
| 151 | Isek, 2019       | A retrospective study of dog bite occurrence and anti-rabies vaccination of dogs in a State Veterinary Hospital in Ogoja, Cross River State, Nigeria                                | No data on RABV prevalence                      |

|     |                    |                                                                                                                            |                                                |
|-----|--------------------|----------------------------------------------------------------------------------------------------------------------------|------------------------------------------------|
| 152 | Jebbar, 2016       | ZOO-03 - Human rabies: 22 cases                                                                                            | No full text                                   |
| 153 | Jemberu, 2013      | Incidence of Rabies in Humans and Domestic Animals and People's Awareness in North Gondar Zone, Ethiopia                   | No data on RABV prevalence                     |
| 154 | Jenwitheesuk, 2005 | Transmission of rabies from an organ donor [1] (multiple letters)                                                          | Comment on an article                          |
| 155 | Jibat, 2016        | Incidence and economic impact of rabies in the cattle population of Ethiopia                                               | No data on RABV prevalence                     |
| 156 | Johnson, 2004      | Molecular epidemiology of rabies in Botswana: A comparison between antibody typing and nucleotide sequence phylogeny       | Only RABV positive samples included            |
| 157 | Johnson, 2004      | Molecular epidemiology of canid rabies in Sudan: Evidence for a common origin of rabies with Ethiopia                      | Only RABV positive samples included            |
| 158 | Johnson, 2010      | A new outbreak of rabies in rare Ethiopian wolves ( <i>Canis simensis</i> )                                                | Sample size < or = 10 participants             |
| 159 | Johnson, 2010      | Human rabies due to lyssavirus infection of bat origin                                                                     | No data on RABV prevalence                     |
| 160 | Johsua, 2012       | Analysis of 4-year dog-bite cases treated at ahmadu bello university health centre, Zaria, Nigeria                         | No data on RABV prevalence                     |
| 161 | Kabaso, 2015       | Rabies trends and surveillance capabilities in Zambia                                                                      | Laboratory assays used unclear or not reported |
| 162 | Kagira, 2012       | An appraisal of rabies occurrence and control in Kisumu Municipality, Kenya                                                | No data on RABV prevalence                     |
| 163 | Kardjadj, 2019     | Epidemiology of dog-mediated zoonotic diseases in Algeria: a One Health control approach                                   | No data on RABV prevalence                     |
| 164 | Kasem, 2019        | Rabies among animals in Saudi Arabia                                                                                       | Data outside of Africa                         |
| 165 | Kat, 1995          | Rabies and African wild dogs in Kenya                                                                                      | Sample size < or = 10 participants             |
| 166 | Kat, 1996          | Rabies among African wild dogs ( <i>Lycaon pictus</i> ) in the Masai Mara, Kenya                                           | Sample size < or = 10 participants             |
| 167 | Kazadi, 2019       | Factors of rabies maintenance in dog population in Kinshasa, Democratic Republic of Congo (DRC)                            | No data on RABV prevalence                     |
| 168 | Kelly, 2004        | Antibodies reactive with <i>Bartonella henselae</i> and <i>Ehrlichia canis</i> in dogs from the communal lands of Zimbabwe | No data on RABV prevalence                     |
| 169 | Kennedy, 1988      | An outbreak of rabies in north-western Zimbabwe 1980 to 1983                                                               | No full text                                   |
| 170 | Kessy, 2012        | Rabies, the neglected cause of mortality in developing countries                                                           | Review                                         |
| 171 | Khalsi, 2018       | Rabies encephalitis in children: a resurgence of a fatal anthroozoonosis                                                   | Case report                                    |
| 172 | Khashei, 2018      | Ante-mortem diagnosis of human rabies cases using SYBR green real-time PCR                                                 | Data outside of Africa                         |
| 173 | King, 1990         | The rabies viruses of bats                                                                                                 | Data outside of Africa                         |
| 174 | King, 1993         | Canid and viverrid rabies viruses in South Africa                                                                          | No data on RABV prevalence                     |
| 175 | Kitala, 1993       | Features of dog ecology relevant to rabies spread in Machakos District, Kenya                                              | No data on RABV prevalence                     |
| 176 | Kubheka, 2013      | Dog bites and human rabies in the Uthungulu District of KwaZulu-Natal province, 2008-2010: A review of surveillance data   | Review                                         |
| 177 | Kuzmin, 2004       | Molecular epidemiology of terrestrial rabies in the former Soviet Union                                                    | Data outside of Africa                         |
| 178 | Laurenson, 1997    | Aspects of rabies epidemiology in Tsumkwe District, Namibia                                                                | Duplicate study                                |
| 179 | Lederman, 1962     | Rabies in Ruanda-Urundi (1954-1961)                                                                                        | No full text                                   |

|     |                       |                                                                                                                                                                                             |                                     |
|-----|-----------------------|---------------------------------------------------------------------------------------------------------------------------------------------------------------------------------------------|-------------------------------------|
| 180 | Lee, 2018             | Geographical and temporal patterns of rabies post exposure prophylaxis (PEP) incidence in humans in the mekong river delta and southeast central coast regions in Vietnam from 2005 to 2015 | Data outside of Africa              |
| 181 | Lembo, 2007           | Molecular epidemiology identifies only a single rabies virus variant circulating in complex carnivore communities of the Serengeti                                                          | Only RABV positive samples included |
| 182 | LeRoux, 2018          | Rabies control in Kwazulu-Natal, South Africa                                                                                                                                               | No data on RABV prevalence          |
| 183 | Macadam, 1975         | Letter: Rabies in the Gambia                                                                                                                                                                | No full text                        |
| 184 | Mailles, 2011         | Rabid dog illegally imported to France from Morocco, August 2011                                                                                                                            | Case report                         |
| 185 | Main, 1979            | Virologic and serologic survey for eastern equine encephalomyelitis and certain other viruses in colonial bats of New England                                                               | Data outside of Africa              |
| 186 | Malerczyk, 2010       | Rabies in South Africa and the FIFA soccer world cup: Travelers' awareness for an endemic but neglected disease                                                                             | No data on RABV prevalence          |
| 187 | Mallewa, 2007         | Rabies encephalitis in malaria-endemic area, Malawi, Africa                                                                                                                                 | No data on RABV prevalence          |
| 188 | Mallewa, 2013         | Viral CNS infections in children from a malaria-endemic area of Malawi: A prospective cohort study                                                                                          | No data on RABV prevalence          |
| 189 | Mani, 2014            | Utility of real-time Taqman PCR for antemortem and postmortem diagnosis of human rabies                                                                                                     | Data outside of Africa              |
| 190 | Mani, 2016            | Rabies following mongoose bite                                                                                                                                                              | Comment on an article               |
| 191 | Mansfield, 2006       | A molecular epidemiological study of rabies epizootics in kudu ( <i>Tragelaphus strepsiceros</i> ) in Namibia                                                                               | Only RABV positive samples included |
| 192 | Markotter, 2009       | Evaluation of a rapid immunodiagnostic test kit for detection of African lyssaviruses from brain material                                                                                   | Sample with already known result    |
| 193 | Marston, 2009         | Phylogenetic analysis of rabies viruses from Sudan provides evidence of a viral clade with a unique molecular signature                                                                     | Only RABV positive samples included |
| 194 | Martinez-Burnes, 1997 | An outbreak of vampire bat-transmitted rabies in cattle in northeastern Mexico                                                                                                              | No data on RABV prevalence          |
| 195 | Masiira, 2018         | Long term trends and spatial distribution of animal bite injuries and deaths due to human rabies infection in Uganda, 2001-2015                                                             | No data on RABV prevalence          |
| 196 | Matondo, 2019         | Evidences of declining rabies: a retrospective study of cumulative clinical data at Sokoine University Animal Hospital, Tanzania                                                            | No full text                        |
| 197 | Maurice, 2018         | Rabies in a set of eight-week old puppies in Nigeria: the need for review of current dog antirabies vaccination schedule                                                                    | Case report                         |
| 198 | Mazigo, 2010          | Retrospective analysis of suspected rabies cases reported at bugando referral hospital, mwanza, Tanzania                                                                                    | No data on RABV prevalence          |
| 199 | Mbilo, 2017           | Rabies awareness and dog ownership among rural northern and southern Chadian communities-Analysis of a community-based, cross-sectional household survey                                    | No data on RABV prevalence          |
| 200 | Mbilo, 2018           | Rabies in dogs, livestock and wildlife: a veterinary perspective                                                                                                                            | Review                              |
| 201 | Mbilo, 2019           | Dog ecology, bite incidence, and disease awareness: A cross-sectional survey among a rabies-affected community in the democratic republic of the congo                                      | No data on RABV prevalence          |
| 202 | McElhinney, 2008      | Molecular epidemiology of lyssaviruses in Eurasia                                                                                                                                           | Data outside of Africa              |
| 203 | McLean, 1979          | Prevalence of selected zoonotic diseases in vertebrates from Haiti, 1972                                                                                                                    | Data outside of Africa              |



|     |                        |                                                                                                                                            |                                     |
|-----|------------------------|--------------------------------------------------------------------------------------------------------------------------------------------|-------------------------------------|
| 204 | Mebatsion, 1993        | Molecular analysis of rabies-related viruses from Ethiopia                                                                                 | No full text                        |
| 205 | Mélade, 2016           | Serological evidence of lyssaviruses among bats on southwestern Indian Ocean islands                                                       | No data on RABV prevalence          |
| 206 | Menghistu, 2018        | Mapping the epidemiological distribution and incidence of major zoonotic diseases in South Tigray, North Wollo and Ab'ala (Afar), Ethiopia | No data on RABV prevalence          |
| 207 | Meredith, 1971         | An Unusual Case of Human Rabies Thought to be of Chiropteran Origin                                                                        | Case report                         |
| 208 | Miller, 2000           | Serologic Survey for Selected Infectious Disease Agents in Swift and Kit Foxes from the Western United States                              | Data outside of Africa              |
| 209 | Mindekem, 2005         | Impact of canine demography on rabies transmission in N'djamena, Chad                                                                      | No data on RABV prevalence          |
| 210 | Minor, 1986            | Rabies in Nigeria                                                                                                                          | No full text                        |
| 211 | Mkhize, 2010           | Re-emergence of dog rabies in Mpumalanga Province, South Africa                                                                            | No data on RABV prevalence          |
| 212 | Monson, 1985           | Practical management of rabies and the 1982 outbreak in Zorzor District, Liberia                                                           | No data on RABV prevalence          |
| 213 | Morters, 2017          | Phylogenetic and phylogeographic analysis of viral surveillance data to inform rabies control programmes in Cambodia                       | Data outside of Africa              |
| 214 | Morvan, 1990           | Rapid diagnosis of rabies by the ELISA method Its application in Madagascar: advantages and disadvantages                                  | No full text                        |
| 215 | Morvan, 1993           | Situation of endemic rabies in Madagascar                                                                                                  | Review                              |
| 216 | Mueller, 1976          | Natural resistance of an African rodent Praomys (Mastomys) natalensis to rabies infection                                                  | Experimental infection              |
| 217 | Muhamuda, 2006         | Presence of rabies specific immune complexes in cerebrospinal fluid can help in ante-mortem diagnosis of human paralytic rabies            | Data outside of Africa              |
| 218 | Muleya, 2012           | Molecular epidemiology and a loop-mediated isothermal amplification method for diagnosis of infection with rabies virus in Zambia          | Sample with already known result    |
| 219 | Muleya, 2019           | Genetic diversity of rabies virus in different host species and geographic regions of Zambia and Zimbabwe                                  | Only RABV positive samples included |
| 220 | Mulipukwa, 2017        | Insights and efforts to control rabies in Zambia: Evaluation of determinants and barriers to dog vaccination in Nyimba district            | No data on RABV prevalence          |
| 221 | Musako, 2018           | Methods for Estimating the Risk of Rabies Transmission to Humans in the Lake Victoria Zone, Tanzania                                       | No data on RABV prevalence          |
| 222 | Muyila, 2014           | Human rabies: A descriptive observation of 21 children in Kinshasa, The democratic republic of Congo                                       | No laboratory confirmed data        |
| 223 | Nalubamba, 2011        | The epidemiology of canine Babesia infections in Zambia                                                                                    | No data on RABV prevalence          |
| 224 | Nel , 2005             | Mongoose rabies in southern Africa: A re-evaluation based on molecular epidemiology                                                        | No data on RABV prevalence          |
| 225 | Nel, 1993              | Molecular epidemiology of rabies virus in South Africa                                                                                     | No data on RABV prevalence          |
| 226 | Ngoepe, 2009           | The spread of canine rabies into Free State province of South Africa: A molecular epidemiological characterization                         | No data on RABV prevalence          |
| 227 | Ngoepe, 2014           | Antigenic characterisation of lyssaviruses in South Africa                                                                                 | Only RABV positive samples included |
| 228 | Ngugi, 2018            | Epidemiology and surveillance of human animal-bite injuries and rabies post-exposure prophylaxis, in selected counties in Kenya, 2011-2016 | No data on RABV prevalence          |
| 229 | No author listed, 1983 | Leads from the MMWR Human rabies--Kenya                                                                                                    | Case report                         |

|     |                        |                                                                                                                                                               |                                                 |
|-----|------------------------|---------------------------------------------------------------------------------------------------------------------------------------------------------------|-------------------------------------------------|
| 230 | No author listed, 2012 | New rabies virus found in Tanzania                                                                                                                            | Comment on an article                           |
| 231 | Noah, 1998             | Epidemiology of human rabies in the United States, 1980 to 1996                                                                                               | Data outside of Africa                          |
| 232 | Nokireki, 2013         | Bat rabies surveillance in Finland                                                                                                                            | Data outside of Africa                          |
| 233 | Nuovo, 2005            | Molecular detection of rabies encephalitis and correlation with cytokine expression                                                                           | Data outside of Africa                          |
| 234 | Nuru, 1974             | Bovine rabies in Kano State, Nigeria                                                                                                                          | No full text                                    |
| 235 | Nyakarahuka, 2012      | Occurrence and mortality rates from rabies in Uganda, 2001- 2009                                                                                              | Only RABV positive samples included             |
| 236 | Oboegbulem, 1981       | Rabies in a Muturu cow in eastern Nigeria                                                                                                                     | No full text                                    |
| 237 | Obonyo, 2016           | Suspected rabies in humans and animals, Laikipia county, Kenya                                                                                                | No data on RABV prevalence                      |
| 238 | Odita, 2017            | Dog owners' attitude, a risk factor for human rabies in Nigeria Rabies in Nigeria                                                                             | No full text                                    |
| 239 | Ogo, 2011              | Phylogenetic Evidence of the Public and Veterinary Health Threat of Dog Rabies in Nigeria                                                                     | Only RABV positive samples included             |
| 240 | Ogola, 2012            | Atypical rabies: A case report from a rabies outbreak in kenya                                                                                                | No full text                                    |
| 241 | Ogundare, 2017         | Pattern and outcome of dog bite injuries among children in Ado-Ekiti, Southwest Nigeria                                                                       | No data on RABV prevalence                      |
| 242 | Ogunkoya, 1984         | Rabies in Oyo State, Nigeria; 1971-1982                                                                                                                       | No full text                                    |
| 243 | Ogunkoya, 2003         | Some cases of rabies with high exposure potential: A field experience                                                                                         | No full text                                    |
| 244 | Ojo, 1967              | Rabies in a Nigerian dwarf goat                                                                                                                               | No full text                                    |
| 245 | Ojo, 2016              | Rabies in Nigeria: A review of literature                                                                                                                     | Review                                          |
| 246 | Okoh, 1981             | Canine rabies in Nigeria, 1970 - 1980 reported cases in vaccinated dogs                                                                                       | Laboratory assays used unclear or not reported  |
| 247 | Okoh, 2000             | Antigenic characterization of rabies virus isolates from vaccinated dogs in plateau state, Nigeria                                                            | No data on RABV prevalence                      |
| 248 | Okoh, 2018             | Rabies in farm livestock in Nigeria                                                                                                                           | No data on RABV prevalence                      |
| 249 | Okolo, 1986            | Rabies in Anambra State, Nigeria                                                                                                                              | No full text                                    |
| 250 | Okolo, 1986            | Cerebral cysticercosis in rural dogs                                                                                                                          | No full text                                    |
| 251 | Okpe, 2011             | Childhood Rabies: A 10 Year Review of Management and Outcome in a Tertiary Centre                                                                             | No full text                                    |
| 252 | Olarinmoye, 2017       | Time series analysis and mortality model of dog bite victims presented for treatment at a referral clinic for rabies exposure in Monrovia, Liberia, 2010–2013 | Not possible to extract data on RABV prevalence |
| 253 | Ouattara, 2012         | Human rabies in Abidjan (Côte d'Ivoire): Recent cases                                                                                                         | No data on RABV prevalence                      |
| 254 | Owolodun, 1968         | Rabies in cattle in Northern States-Nigeria                                                                                                                   | No full text                                    |
| 255 | Pant, 2014             | Molecular epidemiology of rabies virus in Nepal                                                                                                               | Data outside of Africa                          |
| 256 | Patrick, 2019          | Enhanced Rabies Surveillance Using a Direct Rapid Immunohistochemical Test                                                                                    | No data on RABV prevalence                      |
| 257 | Pellissier, 1955       | Rabies in French West Africa; 82 cases of which 2 human                                                                                                       | No full text                                    |
| 258 | Pieracci, 2016         | Notes from the Field: Assessment of Health Facilities for Control of Canine Rabies - Gondar City, Amhara Region, Ethiopia, 2015                               | No data on RABV prevalence                      |
| 259 | Proudfoot, 1972        | Case study: rabies in Nigeria                                                                                                                                 | No full text                                    |
| 260 | Rajeev, 2019           | Healthcare utilization, provisioning of post-exposure prophylaxis, and estimation of human rabies burden in Madagascar                                        | Not possible to extract data on RABV prevalence |

|     |                    |                                                                                                                                                                                                                                |                                                 |
|-----|--------------------|--------------------------------------------------------------------------------------------------------------------------------------------------------------------------------------------------------------------------------|-------------------------------------------------|
| 261 | Ramos, 2011        | Epidemiology of animal bites and other potential rabies exposures and anti-rabies vaccine utilization in a rural area in Southern Ethiopia                                                                                     | No data on RABV prevalence                      |
| 262 | Ratho, 2001        | Experience of human rabies in north India                                                                                                                                                                                      | Data outside of Africa                          |
| 263 | Redwan, 2009       | Ovine anti-rabies antibody production and evaluation                                                                                                                                                                           | No data on RABV prevalence                      |
| 264 | Reuter, 2018       | Rabies in primates: are aggressive pet lemurs a risk to humans?                                                                                                                                                                | Review                                          |
| 265 | Reynes, 1999       | Characterization and observation of animals responsible for rabies post-exposure treatment in Phnom Penh, Cambodia                                                                                                             | Data outside of Africa                          |
| 266 | Rhodes, 1998       | Rabies in Zimbabwe: reservoir dogs and the implications for disease control                                                                                                                                                    | Not possible to extract data on RABV prevalence |
| 267 | Ripani, 2017       | Review of rabies situation and control in the North African region with a focus on Tunisia                                                                                                                                     | Review                                          |
| 268 | Rollin, 1984       | Antigenic characteristics of strains of rabies isolated in Madagascar                                                                                                                                                          | No full text                                    |
| 269 | Röttcher, 1978     | Wildlife rabies in Zambia                                                                                                                                                                                                      | Sample with already known result                |
| 270 | Sabeta, 2003       | Molecular epidemiology of canid rabies in Zimbabwe and South Africa                                                                                                                                                            | Only RABV positive samples included             |
| 271 | Sabeta, 2005       | Importation of canid rabies in a horse relocated from Zimbabwe to South Africa                                                                                                                                                 | No data on RABV prevalence                      |
| 272 | Sabeta, 2007       | Molecular epidemiology of rabies in bat-eared foxes ( <i>Otocyon megalotis</i> ) in South Africa                                                                                                                               | Only RABV positive samples included             |
| 273 | Sabeta, 2008       | Mongoose rabies and the African civet in Zimbabwe                                                                                                                                                                              | No data on RABV prevalence                      |
| 274 | Sabeta, 2011       | An evaluation of dog rabies control in Limpopo province (South Africa)                                                                                                                                                         | Only RABV positive samples included             |
| 275 | Salaun, 1973       | The present state of rabies on the Ivory Coast                                                                                                                                                                                 | No full text                                    |
| 276 | Salomão, 2017      | Epidemiology, clinical features and risk factors for human rabies and animal bites during an outbreak of rabies in Maputo and Matola cities, Mozambique, 2014: Implications for public health interventions for rabies control | Sample with already known result                |
| 277 | Sambo, 2014        | The Burden of Rabies in Tanzania and Its Impact on Local Communities                                                                                                                                                           | Not possible to extract data on RABV prevalence |
| 278 | Savadogo, 2015     | Rabies in children: an often unknown risk among populations at risk                                                                                                                                                            | Case report                                     |
| 279 | Sawchuk, 1978      | Mongoose rabies in Zambia                                                                                                                                                                                                      | Case report                                     |
| 280 | Schneider, 1963    | EPIDEMIOLOGICAL RESEARCH ON RABIES IN THE CITY OF TUNIS                                                                                                                                                                        | No full text                                    |
| 281 | Scott, 1988        | Rabies in Lesotho                                                                                                                                                                                                              | No full text                                    |
| 282 | Scott, 2012        | Rabies in kudu ( <i>Tragelaphus strepsiceros</i> )                                                                                                                                                                             | Case report                                     |
| 283 | Scott, 2013        | Complete Genome and Molecular Epidemiological Data Infer the Maintenance of Rabies among Kudu ( <i>Tragelaphus strepsiceros</i> ) in Namibia                                                                                   | Only RABV positive samples included             |
| 284 | Screenivasan, 2019 | Overview of rabies post-exposure prophylaxis access, procurement and distribution in selected countries in Asia and Africa, 2017–2018                                                                                          | No data on RABV prevalence                      |
| 285 | Selimov, 1991      | New strains of rabies-related viruses isolated from bats in the Ukraine                                                                                                                                                        | Data outside of Africa                          |

|     |                     |                                                                                                                                                                |                                                 |
|-----|---------------------|----------------------------------------------------------------------------------------------------------------------------------------------------------------|-------------------------------------------------|
| 286 | Selly-Essis, 1982   | The rabies endemic in the Ivory Coast as seen through the work of the Pasteur Institute of the Ivory Coast                                                     | No full text                                    |
| 287 | Serra-Cobo, 2018    | Active sero-survey for European bat lyssavirus type-1 circulation in North African insectivorous bats                                                          | No data on RABV prevalence                      |
| 288 | Servas, 2005        | An imported case of canine rabies in Aquitaine: investigation and management of the contacts at risk, August 2004-March 2005                                   | Data outside of Africa                          |
| 289 | Skull, 1999         | A retrospective search for lyssavirus in humans in the Northern Territory                                                                                      | Data outside of Africa                          |
| 290 | Smith, 1993         | Rabies in wild and domestic carnivores of Africa: epidemiological and historical associations determined by limited sequence analysis                          | Only RABV positive samples included             |
| 291 | Sow, 1991           | Human rabies in Senegal: epidemiological and clinical aspects                                                                                                  | No full text                                    |
| 292 | Stein, 2010         | Immunohistochemical study of rabies virus within the central nervous system of domestic and wildlife species                                                   | No data on RABV prevalence                      |
| 293 | Suluku, 2017        | First reported case of dog associated cattle rabies in Koinadugu district, Northern Sierra Leone                                                               | Case report                                     |
| 294 | Sureau, 1982        | Antigenic variants among street rabies virus isolates from France, Africa, Madagascar and Asia Preliminary results with antinucleocapsid monoclonal antibodies | No data on RABV prevalence                      |
| 295 | Suu-Ire, 2017       | Lagos Bat Virus Infection Dynamics in Free-Ranging Straw-Colored Fruit Bats ( <i>Eidolon helvum</i> )                                                          | No data on RABV prevalence                      |
| 296 | Swai, 2010          | Spatial and temporal distribution of rabies in northern Tanzania in the period of 1993-2002                                                                    | Duplicate study                                 |
| 297 | Swanepoel, 1993     | Rabies in southern Africa                                                                                                                                      | Review                                          |
| 298 | Talbi, 2009         | Evolutionary history and dynamics of dog rabies virus in western and central Africa                                                                            | Only RABV positive samples included             |
| 299 | Tan, 2014           | Viral Aetiology of Central Nervous System Infections in Adults Admitted to a Tertiary Referral Hospital in Southern Vietnam over 12 Years                      | Data outside of Africa                          |
| 300 | Tasiame, 2016       | First reported case of dog associated pig rabies in Ghana                                                                                                      | Case report                                     |
| 301 | Tefera, 2002        | Endemic existence of rabies in Ethiopia                                                                                                                        | Laboratory assays used unclear or not reported  |
| 302 | Tekki, 2014         | Tissue culture isolation of lyssa viruses from apparently healthy unvaccinated dogs in Nigeria                                                                 | Not possible to extract data on RABV prevalence |
| 303 | Teklu, 2017         | High Incidence of Human Rabies Exposure in Northwestern Tigray, Ethiopia: A Four-Year Retrospective Study                                                      | No data on RABV prevalence                      |
| 304 | Tepsumethanon, 2016 | Dogs that develop rabies post-vaccination usually manifest the paralytic subtype                                                                               | Data outside of Africa                          |
| 305 | Thaiyah, 2001       | Outbreak of Bovine Rabies in Kiambu District, Kenya                                                                                                            | No full text                                    |
| 306 | Thalwitzer, 2010    | Seroprevalences to viral pathogens in free-ranging and captive cheetahs ( <i>Acinonyx jubatus</i> ) on Namibian farmland                                       | Not possible to extract data on RABV prevalence |
| 307 | Thomas, 2014        | Rabies post-exposure prophylaxis at a clinic in Fajara, The Gambia                                                                                             | No data on RABV prevalence                      |
| 308 | Thomson, 1993       | Rabies in bat-eared foxes in South Africa                                                                                                                      | No data on RABV prevalence                      |
| 309 | Tiembré, 2008       | Compliance with veterinary surveillance orders at the rabies control center in Abijan, Ivory Coast                                                             | No full text                                    |
| 310 | Tiembré, 2009       | Adherence to rabies vaccine treatment for people exposed to rabies in Abidjan (Côte d' Ivoire)                                                                 | No data on RABV prevalence                      |
| 311 | Tiembré, 2010       | Epidemiologic monitoring of human rabies in an endemic canine rabies area in the Ivory Coast                                                                   | Only RABV positive samples included             |

|     |                        |                                                                                                                                                                                                     |                                                |
|-----|------------------------|-----------------------------------------------------------------------------------------------------------------------------------------------------------------------------------------------------|------------------------------------------------|
| 312 | Tiembré, 2011          | The epidemiological profile of subjects exposed to rabies in Abidjan, Ivory Coast                                                                                                                   | No data on RABV prevalence                     |
| 313 | Tiembre, 2013          | Discontinuation of postexposure prophylaxis at the anti-rabies Center of Abidjan, Côte d'Ivoire                                                                                                     | No data on RABV prevalence                     |
| 314 | Traoré, 2016           | Molecular Characterization of Canine Rabies Virus, Mali, 2006-2013                                                                                                                                  | Sample with already known result               |
| 315 | Traoré, 2016           | Molecular characterization of canine rabies virus, Mali, 2006–2013                                                                                                                                  | Duplicate study                                |
| 316 | Tremlett, 1994         | Rabies virus typing--preliminary survey in Botswana                                                                                                                                                 | Only RABV positive samples included            |
| 317 | Umoh, 1979             | Rabies in Nigeria A historical review                                                                                                                                                               | Review                                         |
| 318 | Umoh, 1990             | Antigenic characterization of street rabies virus isolates from Nigeria using monoclonal antibodies                                                                                                 | Only RABV positive samples included            |
| 319 | van Sittert, 2010      | Rabies in the Eastern Cape Province of South Africa-- where are we going wrong?                                                                                                                     | No data on RABV prevalence                     |
| 320 | van Wyk, 1971          | Rabies in Otavi and Tsumeb, South West Africa                                                                                                                                                       | No data on RABV prevalence                     |
| 321 | Van Zyl, 2010          | Evolutionary history of African mongoose rabies                                                                                                                                                     | Only RABV positive samples included            |
| 322 | Voehl, 2014            | Evaluation of a rapid immunodiagnostic rabies field surveillance test on samples collected from military operations in Africa, Europe, and the Middle East                                          | No full text                                   |
| 323 | Von Teichman, 1995     | Molecular epidemiology of rabies virus in South Africa: Evidence for two distinct virus groups                                                                                                      | Only RABV positive samples included            |
| 324 | Wacharapluesadee, 2011 | Comparative detection of rabies RNA by NASBA, real-time PCR and conventional PCR                                                                                                                    | No data on RABV prevalence                     |
| 325 | Wangoda, 2019          | Animal bite injuries in the accident and emergency unit at Mulago hospital in Kampala, Uganda                                                                                                       | No data on RABV prevalence                     |
| 326 | Weyer, 2011            | Epidemiology of human rabies in South Africa, 1983-2007                                                                                                                                             | Only RABV positive samples included            |
| 327 | Weyer, 2015            | Rabies in South Africa: Where Do We Stand in 2015?                                                                                                                                                  | No data on RABV prevalence                     |
| 328 | Williamson, 1976       | Rabies in Rhodesia, 1950-1976                                                                                                                                                                       | No full text                                   |
| 329 | Wiwanitkit, 2014       | Stray dog meat consumption and rabies                                                                                                                                                               | No data on RABV prevalence                     |
| 330 | Xu, 2007               | A simple sandwich ELISA (WELYSSA) for the detection of lyssavirus nucleocapsid in rabies suspected specimens using mouse monoclonal antibodies                                                      | Sample with already known result               |
| 331 | Yahiaoui, 2018         | The epidemiology of dog rabies in Algeria: Retrospective national study of dog rabies cases, determination of vaccination coverage and immune response evaluation of three commercial used vaccines | No data on RABV prevalence                     |
| 332 | Yibrah, 2015           | Incidence of human rabies exposure and associated factors at the Gondar Health Center, Ethiopia: A three-year retrospective study                                                                   | No data on RABV prevalence                     |
| 333 | Yilmaz, 2014           | Evaluation of cases with rabies risk presenting to emergency department                                                                                                                             | Data outside of Africa                         |
| 334 | Yimer, 2002            | Situation of Rabies in Ethiopia: A retrospective study 1990-2000                                                                                                                                    | Laboratory assays used unclear or not reported |
| 335 | Yizengaw, 2018         | Incidence of human rabies virus exposure in northwestern Amhara, Ethiopia                                                                                                                           | No data on RABV prevalence                     |

|     |               |                                                                                                                                                                                                                          |                                                 |
|-----|---------------|--------------------------------------------------------------------------------------------------------------------------------------------------------------------------------------------------------------------------|-------------------------------------------------|
| 336 | Youla, 2014   | Canine and human rabies in Conakry: epidemiology and preventive aspects                                                                                                                                                  | No laboratory confirmed data                    |
| 337 | Zhang, 2014   | Survey on rabies virus carried by domestic dogs in Henan and Shaanxi Province, China                                                                                                                                     | Data outside of Africa                          |
| 338 | Zhao, 2019    | Letter to the editor in response to 'Molecular detection of rabies virus strain with N-gene that clustered with China lineage 2 co-circulating with Africa lineages in Monrovia, Liberia: First reported case in Africa' | No data on RABV prevalence                      |
| 339 | Zimmer, 2018  | Canine rabies vaccination reduces child rabies cases in Malawi                                                                                                                                                           | No data on RABV prevalence                      |
| 340 | Zimmer, 2019  | Assessment of the impact on paediatric rabies at Queen Elizabeth Central Hospital, Blantyre, Malawi, following a mass canine rabies vaccination programme                                                                | No data on RABV prevalence                      |
| 341 | Zulu, 2009    | Molecular epidemiology of rabies: Focus on domestic dogs ( <i>Canis familiaris</i> ) and black-backed jackals ( <i>Canis mesomelas</i> ) from northern South Africa                                                      | Only RABV positive samples included             |
| 342 | Zwart, 1969   | Some epidemiological aspects of rabies in Nigeria and Ghana                                                                                                                                                              | No full text                                    |
| 343 | Moagabo, 2009 | A retrospective longitudinal study of animal and human rabies in Botswana 1989-2006                                                                                                                                      | Not possible to extract data on RABV prevalence |

## Reference

1. Savadogo, M., et al., *Rabies in children: an often unknown risk among populations at risk*. Médecine et santé tropicales % @ 2261-2211, 2015. **25**(2): p. 222-224.
2. Mbilo, C., et al., *Rabies in dogs, livestock and wildlife: a veterinary perspective*. Revue scientifique et technique (International Office of Epizootics) % @ 0253-1933, 2018. **37**(2): p. 331-340.
3. Botros, B.A., et al., *Rabies in Egypt: biological and antigenic properties of four viruses recovered from nonclassical rabies cases*. Bulletin of animal health and production in Africa. Bulletin des santé et production animales en Afrique % @ 0378-9721, 1976. **24**(1): p. 34-42.
4. Okoh, A.E.U.h.p.n.n.n.g., *Rabies in farm livestock in Nigeria*. International journal of zoonoses % @ 0377-0168, 1981. **8**(1): p. 51-56.
5. Pellissier, A.U.h.w.e.c.s.r.s.v., from=export, and id=L, *Rabies in French West Africa; 82 cases of which 2 human*. Bulletin de la Société de pathologie exotique et de ses filiales % @ 0037-9085, 1955. **48**(4): p. 458-463.
6. Alonge, D.O., et al., *Rabies in Ghana, West Africa*. International Journal of Zoonoses % @ 0377-0168, 1984. **11**(1): p. 53-58.
7. Horton, D.L., et al., *Rabies in Iraq: Trends in Human Cases 2001-2010 and Characterisation of Animal Rabies Strains from Baghdad*. PLoS Neglected Tropical Diseases, 2013. **7**(2).
8. Scott, T., et al., *Rabies in kudu (*Tragelaphus strepsiceros*)*. Berliner und Munchener Tierärztliche Wochenschrift % @ 0005-9366, 2012. **125**(5): p. 236-241.
9. Elegbeleye, O.O.U.h.w.e.c.s.r.s.v., from=export, and id=L, *Rabies in Lagos, Nigeria*. West African Medical Journal, 1975. **23**(4): p. 149-150.
10. Scott, C.D.U.h.w.e.c.s.r.s.v., from=export, and L.h.d.d.o.v.a. id, *Rabies in Lesotho*. The Veterinary record % @ 0042-4900, 1988. **122**(12): p. 287.
11. Minor, R.U.h.w.e.c.s.r.s.v., from=export, and L.h.d.d.o.v. id, *Rabies in Nigeria*. The Veterinary record % @ 0042-4900, 1986. **119**(9): p. 223-224.
12. Umoh, J.U., et al., *Rabies in Nigeria. A historical review*. International Journal of Zoonoses % @ 0377-0168, 1979. **6**(1): p. 41-48.
13. van Wyk, J.A.U.h.w.e.c.s.r.s.v., from=export, and id=L, *Rabies in Otavi and Tsumeb, South West Africa*. Journal of the South African Veterinary Medical Association % @ 0038-2809, 1971. **42**(3): p. 237-241.
14. Ogunkoya, A.B., et al., *Rabies in Oyo State, Nigeria; 1971-1982*. International Journal of Zoonoses % @ 0377-0168, 1984. **11**(1): p. 84-94.

15. Williamson, J.M.U.h.w.e.c.s.r.s.v., from=export, and id=L, *Rabies in Rhodesia, 1950-1976*. Bulletin de l'Office International des Epizooties %@ 0300-9823, 1976: p. 361-364.
16. Foggin, C.M., et al., *Rabies in Rhodesia: The current situation*. Central African Journal of Medicine %@ 0008-9176, 1979. **25**(5): p. 98-100.
17. Howell, R.T.U.h.w.e.c.s.r.s.v., from=export, and id=L, *Rabies in rodents and lagomorphs*. The Journal of the Arkansas Medical Society %@ 0004-1858, 1976. **73**(6): p. 249-250.
18. Lederman, F., P. Fagard, and R.U.h.p.n.n.n.g. Vandesteene, *Rabies in Ruanda-Urundi. (1954-1961)*. Annales de la Societe belge de medecine tropicale (1920) %@ 0365-6527, 1962. **42**: p. 743-770.
19. Malerczyk, C., et al., *Rabies in South Africa and the FIFA soccer world cup: Travelers' awareness for an endemic but neglected disease*. Human Vaccines %@ 1554-8600 1554-8619, 2010. **6**(5): p. 385-389.
20. Weyer, J.U.h.w.e.c.s.r.s.v., from=export, and L.h.d.d.o. id, *Rabies in South Africa: Where Do We Stand in 2015?* Southern African Journal of Infectious Diseases %@ 2313-1810 2312-0053, 2015. **30**(2): p. 40-41.
21. Hameid, O.A.U.h.w.e.c.s.r.s.v., from=export, and L.h.d.d.o.v. id, *Rabies in Sudan: an epidemiological review*. The Veterinary record %@ 0042-4900, 1991. **128**(3): p. 61-62.
22. Botros, B.A., et al., *Rabies in the Arab Republic of Egypt: III. Enzootic rabies in wildlife*. The Journal of tropical medicine and hygiene %@ 0022-5304, 1977. **80**(3): p. 59-62.
23. van Sittert, S.J., et al., *Rabies in the Eastern Cape Province of South Africa--where are we going wrong?* Journal of the South African Veterinary Association %@ 1019-9128, 2010. **81**(4): p. 207-215.
24. Ben Néfissa, K., et al., *Rabies in Tunisia during the 19th century: case increase or disease emergence?* Gesnerus %@ 0016-9161, 2007. **64**(3): p. 173-192.
25. Chadli, A.U.h.w.e.c.s.r.s.v., from=export, and id=L, *Rabies in Tunisia. A comparative study of results from the last 36 years*. Archives de l'Institut Pasteur de Tunis %@ 0020-2509, 1988. **65**(1): p. 15-27.
26. Chadli, A.U.h.w.e.c.s.r.s.v., from=export, and id=L, *Rabies in Tunisia. Analysis of the results of the last 34 years*. Archives de l'Institut Pasteur de Tunis %@ 0020-2509, 1986. **63**(1): p. 15-34.
27. Bourhy, H., et al., *Rabies in vaccinated dogs in Gabon*. The Veterinary record %@ 0042-4900, 1988. **122**(15): p. 361-362.
28. Smith, J.S., et al., *Rabies in wild and domestic carnivores of Africa: epidemiological and historical associations determined by limited sequence analysis*. The Onderstepoort journal of veterinary research %@ 0030-2465, 1993. **60**(4): p. 307-314.
29. Burrows, R.U.h.p.n.n.n.g., *Rabies in wild dogs*. Nature %@ 0028-0836, 1992. **359**(6393): p. 277-277.
30. Akafekwa, G.U.h.w.e.c.s.r.s.v., from=export, and id=L, *Rabies in Zambia*. Bulletin de l'Office International des Epizooties %@ 0300-9823, 1976: p. 373-382.
31. Balint, O.U.h.w.e.c.s.r.s.v., from=export, and id=L, *Rabies in Zambian children*. Medical journal of Zambia %@ 0047-651X, 1976. **10**(6): p. 170-173.
32. Rhodes, C.J., et al., *Rabies in Zimbabwe: reservoir dogs and the implications for disease control*. Philosophical transactions of the Royal Society of London. Series B, Biological sciences %@ 0962-8436 1471-2970, 1998. **353**(1371): p. 999-1010.
33. Bingham, J., et al., *Rabies incubation in an African civet (Civettictis civetta)*. The Veterinary record %@ 0042-4900, 1994. **134**(20): p. 528.
34. Thomas, E., et al., *Rabies post-exposure prophylaxis at a clinic in Fajara, The Gambia*. Transactions of the Royal Society of Tropical Medicine and Hygiene %@ 1878-3503 0035-9203, 2014. **108**(8): p. 513-515.
35. Gadre, G., et al., *Rabies viral encephalitis: Clinical determinants in diagnosis with special reference to paralytic form*. Journal of Neurology, Neurosurgery and Psychiatry, 2010. **81**(7): p. 812-820.
36. King, A., P. Davies, and A.U.h.p.n.n.n.g. Lawrie, *The rabies viruses of bats*. Veterinary microbiology %@ 0378-1135, 1990. **23**(1): p. 165-174.

37. Morvan, J., et al., *Rapid diagnosis of rabies by the ELISA method. Its application in Madagascar: advantages and disadvantages*. Archives de l'Institut Pasteur de Madagascar %@ 0020-2495, 1990. **57**(1): p. 193-203.
38. Dacheux, L., et al., *A reliable diagnosis of human rabies based on analysis of skin biopsy specimens*. Clinical infectious diseases : an official publication of the Infectious Diseases Society of America %@ 1537-6591, 2008. **47**(11): p. 1410-1417.
39. Fassi-Fehri, M., et al., *Remarks on the epidemiology of rabies in Morocco*. Maroc médical %@ 0025-388X, 1968. **48**(518): p. 624-630.
40. Bingham, J., et al., *Report of isolations of unusual lyssaviruses (rabies and Mokola virus) identified retrospectively from Zimbabwe*. Journal of the South African Veterinary Association %@ 2224-9435 1019-9128, 2001. **72**(2): p. 92-94.
41. Bah, S.O., et al., *Reservoir of camel rabies in Mauritania*. Revue d'élevage et de médecine vétérinaire des pays tropicaux %@ 0035-1865, 1981. **34**(3): p. 263-265.
42. Chadli, A., et al., *The reservoir of rabies virus in Tunisia*. Archives de l'Institut Pasteur de Tunis %@ 0020-2509, 1982. **59**(1): p. 23-31.
43. De Nardo, P., et al., *A retrospective evaluation of bites at risk of rabies transmission across 7 years: The need to improve surveillance and reporting systems for rabies elimination*. PLoS ONE %@ 1932-6203, 2018. **13**(7).
44. Skull, S.A., et al., *A retrospective search for lyssavirus in humans in the Northern Territory*. Australian and New Zealand Journal of Public Health, 1999. **23**(3): p. 305-308.
45. Allen, A.L., et al., *A retrospective study of brain lesions in goats submitted to three veterinary diagnostic laboratories*. Journal of Veterinary Diagnostic Investigation, 2013. **25**(4): p. 482-489.
46. Isek, T.I., et al., *A retrospective study of dog bite occurrence and anti-rabies vaccination of dogs in a State Veterinary Hospital in Ogoja, Cross River State, Nigeria*. Veterinaria italiana %@ 1828-1427, 2019. **55**(2): p. 163-168.
47. Byaruhanga, J., et al., *Retrospective study on cattle and poultry diseases in Uganda*. International Journal of Veterinary Science and Medicine %@ 2314-4599, 2017. **5**(2): p. 168-174.
48. Coertse, J., et al., *Reverse transcription recombinase polymerase amplification assay for rapid detection of canine associated rabies virus in Africa*. PLoS ONE %@ 1932-6203, 2019. **14**(7).
49. Ripani, A., et al., *Review of rabies situation and control in the North African region with a focus on Tunisia*. Revue scientifique et technique (International Office of Epizootics) %@ 0253-1933, 2017. **36**(3): p. 831-838.
50. Gebru, G., et al., *Risk factors and spatio-temporal patterns of human rabies exposure in northwestern tigray, ethiopia*. Annals of Global Health %@ 2214-9996, 2019. **85**(1).
51. Hergert, M., K. le Roux, and L.H.U.h.p.n.n.n.g.h.w.n.n.n.g.p.a.P.M.C. Nel, *Risk factors associated with nonvaccination rabies status of dogs in KwaZulu-Natal, South Africa*. Veterinary medicine (Auckland, N.Z.) %@ 2230-2034, 2016. **7**: p. 75-83.
52. Barnard, B.J.U.h.w.e.c.s.r.s.v., from=export, and id=L, *The role played by wildlife in the epizootiology of rabies in South Africa and South-West Africa*. The Onderstepoort journal of veterinary research %@ 0030-2465, 1979. **46**(3): p. 155-163.
53. Miller, D.S., et al., *Serologic Survey for Selected Infectious Disease Agents in Swift and Kit Foxes from the Western United States*. Journal of Wildlife Diseases, 2000. **36**(4): p. 798-805.
54. Mélade, J., et al., *Serological evidence of lyssaviruses among bats on southwestern Indian Ocean islands*. PLoS ONE %@ 1932-6203, 2016. **11**(8).
55. Thalwitzer, S., et al., *Seroprevalences to viral pathogens in free-ranging and captive cheetahs (Acinonyx jubatus) on Namibian farmland*. Clinical and Vaccine Immunology %@ 1556-6811 1556-679X, 2010. **17**(2): p. 232-238.
56. Morvan, J.M., et al., *Situation of endemic rabies in Madagascar*. Archives de l'Institut Pasteur de Madagascar %@ 0020-2495, 1993. **60**(1): p. 5-8.
57. Antunes, K.D., et al., *Spatio-temporal study of diagnosis of rabies in vampire bats in sergipe (Brazil), between 1987 and 2014*. Bioscience Journal, 2019. **35**(1): p. 244-250.



58. Ngoepe, C.E., et al., *The spread of canine rabies into Free State province of South Africa: A molecular epidemiological characterization*. Virus Research % @ 0168-1702, 2009. **142**(1): p. 175-180.
59. Ekanem, E.E., et al., *Stray dog trade fuelled by dog meat consumption as a risk factor for rabies infection in Calabar, Southern Nigeria*. African Health Sciences % @ 1680-6905, 2013. **13**(4): p. 1170-1173.
60. Botros, B.A.M., et al., *A study to evaluate non-fatal rabies in animals*. Journal of Tropical Medicine and Hygiene % @ 0022-5304, 1979. **82**(7): p. 137-141.
61. Zhang, Z., et al., *Survey on rabies virus carried by domestic dogs in Henan and Shaanxi Province, China*. International Journal of Infectious Diseases % @ 1201-9712, 2014. **21**: p. 186.
62. Courtin, F., et al., *Temporal patterns of domestic and wildlife rabies in central Namibia stock-ranching area, 1986-1996*. Preventive Veterinary Medicine % @ 0167-5877, 2000. **43**(1): p. 13-28.
63. Olarinmoye, A.O., et al., *Time series analysis and mortality model of dog bite victims presented for treatment at a referral clinic for rabies exposure in Monrovia, Liberia, 2010–2013*. Spatial and Spatio-temporal Epidemiology % @ 1877-5853 1877-5845, 2017. **22**: p. 1-13.
64. Jenwitheesuk, E., et al., *Transmission of rabies from an organ donor [1] (multiple letters)*. New England Journal of Medicine, 2005. **352**(24): p. 2551-2552.
65. Blendon, D.C., et al., *Use of immunofluorescence examination to detect rabies virus antigen in the skin of humans with clinical encephalitis*. Journal of Infectious Diseases, 1986. **154**(4): p. 698-701.
66. Tan, L.V., et al., *Viral Aetiology of Central Nervous System Infections in Adults Admitted to a Tertiary Referral Hospital in Southern Vietnam over 12 Years*. PLoS Neglected Tropical Diseases, 2014. **8**(8).
67. Mallewa, M., et al., *Viral CNS infections in children from a malaria-endemic area of Malawi: A prospective cohort study*. The Lancet Global Health % @ 2214-109X, 2013. **1**(3): p. E153-E160.
68. De Ory, F., et al., *Viral infections of the central nervous system in Spain: A prospective study*. Journal of Medical Virology, 2013. **85**(3): p. 554-562.
69. Durojaiye, O.A.U.h.w.e.c.s.r.s.v., from=export, and id=L, *Viral zoonoses in Nigeria: (I) Rabies*. International Journal of Zoonoses % @ 0377-0168, 1984. **11**(1): p. 65-68.
70. Main, A.J.U.h.w.s.c.i.r.u.e.s., et al., *Virologic and serologic survey for eastern equine encephalomyelitis and certain other viruses in colonial bats of New England*. Journal of wildlife diseases, 1979. **15**(3): p. 455-466.
71. Bayyappa, M.G., et al., *Wild animal rabies in India: Possibility of species spill over*. International Journal of Infectious Diseases % @ 1201-9712, 2014. **21**: p. 188.
72. Jebbar, S., et al., *ZOO-03 - Human rabies: 22 cases*. Medecine et Maladies Infectieuses % @ 1769-6690 0399-077X, 2016. **46**(4): p. 131.
73. Wangoda, R., et al., *Animal bite injuries in the accident and emergency unit at Mulago hospital in Kampala, Uganda*. Pan African Medical Journal % @ 1937-8688, 2019. **33**.
74. Sureau, P., et al., *Antigenic variants among street rabies virus isolates from France, Africa, Madagascar and Asia. Preliminary results with antinucleocapsid monoclonal antibodies*. Comparative Immunology, Microbiology and Infectious Diseases % @ 0147-9571, 1982. **5**(1): p. 109-112.
75. Laurenson, K., et al., *Aspects of rabies epidemiology in Tsumkwe District, Namibia*. The Onderstepoort journal of veterinary research % @ 0030-2465, 1997. **64**(1): p. 39-45.
76. Nuru, S., et al., *Bovine rabies in Kano State, Nigeria*. Bulletin of epizootic diseases of Africa. Bulletin des épizooties en Afrique % @ 0007-487X, 1974. **22**(3): p. 211-215.
77. Youla, A.S., et al., *Canine and human rabies in Conakry: epidemiology and preventive aspects*. Bulletin de la Société de pathologie exotique (1990) % @ 0037-9085, 2014. **107**(1): p. 18-21.

78. Adomako, B.Y., et al., *Dog bites and rabies in the Eastern Region of Ghana in 2013-2015: A call for a one-health approach*. Journal of Tropical Medicine % @ 1687-9694 1687-9686, 2018. **2018**.
79. Dacheux, L., et al., *Dual Combined Real-Time Reverse Transcription Polymerase Chain Reaction Assay for the Diagnosis of Lyssavirus Infection*. PLoS Neglected Tropical Diseases % @ 1935-2735 1935-2727, 2016. **10**(7).
80. Tiembré, I., et al., *Epidemiologic monitoring of human rabies in an endemic canine rabies area in the Ivory Coast*. Medecine et Maladies Infectieuses % @ 0399-077X 1769-6690, 2010. **40**(7): p. 398-403.
81. Babaniyi, O., et al., *Epidemiological characteristics of rabies in Zambia: A retrospective study (2004-2013)*. Clinical Epidemiology and Global Health % @ 2213-3984, 2016. **4**(2): p. 83-88.
82. Brückner, G.K.U.h.w.e.c.s.r.s.v., from=export, and id=L, *The epidemiology and control of rabies in South Africa*. Acta veterinaria Scandinavica. Supplementum % @ 0065-1699, 1988. **84**: p. 312-315.
83. Nalubamba, K.S., et al., *The epidemiology of canine Babesia infections in Zambia*. Preventive Veterinary Medicine % @ 0167-5877, 2011. **99**(2): p. 240-244.
84. Weyer, J., et al., *Epidemiology of human rabies in South Africa, 1983-2007*. Virus Research % @ 0168-1702, 2011. **155**(1): p. 283-290.
85. Coulanges, P., et al., *Epidemiology of rabies in Madagascar*. Archives de l'Institut Pasteur de Tunis % @ 0020-2509, 1982. **59**(1): p. 47-74.
86. Georges, A.J.U.h.w.e.c.s.r.s.v., from=export, and id=L, *Epidemiology of rabies in the Central African Republic*. Archives de l'Institut Pasteur de Tunis % @ 0020-2509, 1982. **59**(1): p. 41-45.
87. Bingham, J., et al., *The epidemiology of rabies in Zimbabwe. 2. Rabies in jackals (Canis adustus and Canis mesomelas)*. The Onderstepoort journal of veterinary research % @ 0030-2465, 1999. **66**(1): p. 11-23.
88. Salomão, C., et al., *Epidemiology, clinical features and risk factors for human rabies and animal bites during an outbreak of rabies in Maputo and Matola cities, Mozambique, 2014: Implications for public health interventions for rabies control*. PLoS Neglected Tropical Diseases % @ 1935-2735 1935-2727, 2017. **11**(7).
89. Hayman, D.T.S., et al., *Evolutionary history of rabies in Ghana*. PLoS Neglected Tropical Diseases % @ 1935-2727 1935-2735, 2011. **5**(4).
90. Teklu, G.G., et al., *High Incidence of Human Rabies Exposure in Northwestern Tigray, Ethiopia: A Four-Year Retrospective Study*. PLoS Neglected Tropical Diseases % @ 1935-2735 1935-2727, 2017. **11**(1).
91. Fagbami, A.H., et al., *Hospital records of human rabies and antirabies prophylaxis in Nigeria 1969-78*. Transactions of the Royal Society of Tropical Medicine and Hygiene % @ 0035-9203, 1981. **75**(6): p. 872-876.
92. Afakye, K., et al., *Household exposure and animal-bite surveillance following human rabies detection in Southern Ghana*. The Pan African medical journal % @ 1937-8688, 2016. **25**: p. 12-12.
93. Ouattara, S.I., et al., *Human rabies in Abidjan (Côte d'Ivoire): Recent cases*. Medecine et sante tropicales % @ 2261-3684 2261-2211, 2012. **22**(2): p. 157-161.
94. Eke, C.B., et al., *Human rabies: still a neglected preventable disease in Nigeria*. Nigerian journal of clinical practice % @ 1119-3077, 2015. **18**(2): p. 268-272.
95. El-Tholoth, M., et al., *Identification and genetic characterization of rabies virus from Egyptian water buffaloes (Bubalus bubalis) bitten by a fox*. VirusDisease % @ 2347-3517 2347-3584, 2015. **26**(3): p. 141-146.
96. Stein, L.T., et al., *Immunohistochemical study of rabies virus within the central nervous system of domestic and wildlife species*. Veterinary Pathology, 2010. **47**(4): p. 630-636.
97. Banerjee, A.K., et al., *The incidence and diagnosis of rabies in Nigeria*. Bulletin of epizootic diseases of Africa. Bulletin des épizooties en Afrique % @ 0007-487X, 1970. **18**(1): p. 53-56.

98. Abubakar, S.A., et al., *Incidence of dog bite injuries and clinical rabies in a tertiary health care institution: A 10-year retrospective study*. *Annals of African Medicine* % @ 1596-3519 0975-5764, 2012. **11**(2): p. 108-111.
99. Yibrah, M., et al., *Incidence of human rabies exposure and associated factors at the Gondar Health Center, Ethiopia: A three-year retrospective study*. *Infectious Diseases of Poverty* % @ 2049-9957, 2015. **4**(1).
100. Yizengaw, E., et al., *Incidence of human rabies virus exposure in northwestern Amhara, Ethiopia*. *BMC Infectious Diseases* % @ 1471-2334, 2018. **18**(1).
101. Harbi, M.S.U.h.w.e.c.s.r.s.v., from=export, and id=L, *The incidence of rabies in animals in the Sudan*. *Bulletin of animal health and production in Africa. Bulletin des santé et production animales en Afrique* % @ 0378-9721, 1976. **24**(1): p. 43-46.
102. Iroegbu, C.U., et al., *Incidence of rabies virus complement-fixing antibodies in unvaccinated dogs, humans and livestock in Anambra State of Nigeria*. *Microbiologica* % @ 0391-5352, 1992. **15**(2): p. 213-217.
103. Menghistu, H.T., et al., *Mapping the epidemiological distribution and incidence of major zoonotic diseases in South Tigray, North Wollo and Ab'ala (Afar), Ethiopia*. *PLoS ONE* % @ 1932-6203, 2018. **13**(12).
104. Eze, U.U., et al., *Molecular Detection of Rabies Lyssaviruses from Dogs in Southeastern Nigeria: Evidence of Transboundary Transmission of Rabies in West Africa*. *Viruses* % @ 1999-4915, 2020. **12**(2).
105. Mansfield, K., et al., *A molecular epidemiological study of rabies epizootics in kudu (Tragelaphus strepsiceros) in Namibia*. *BMC veterinary research* % @ 1746-6148, 2006. **2**: p. 2.
106. Muleya, W., et al., *Molecular epidemiology and a loop-mediated isothermal amplification method for diagnosis of infection with rabies virus in Zambia*. *Virus Research* % @ 0168-1702 1872-7492, 2012. **163**(1): p. 160-168.
107. Lembo, T., et al., *Molecular epidemiology identifies only a single rabies virus variant circulating in complex carnivore communities of the Serengeti*. *Proceedings of the Royal Society B: Biological Sciences* % @ 1471-2970 0962-8452, 2007. **274**(1622): p. 2123-2130.
108. Johnson, N., et al., *Molecular epidemiology of canid rabies in Sudan: Evidence for a common origin of rabies with Ethiopia*. *Virus Research* % @ 0168-1702, 2004. **104**(2): p. 201-205.
109. Sabeta, C.T., et al., *Molecular epidemiology of canid rabies in Zimbabwe and South Africa*. *Virus Research* % @ 0168-1702, 2003. **91**(2): p. 203-211.
110. Sabeta, C.T., et al., *Molecular epidemiology of rabies in bat-eared foxes (Otocyon megalotis) in South Africa*. *Virus Research* % @ 0168-1702, 2007. **129**(1): p. 1-10.
111. Johnson, N., et al., *Molecular epidemiology of rabies in Botswana: A comparison between antibody typing and nucleotide sequence phylogeny*. *Veterinary Microbiology* % @ 0378-1135, 2004. **101**(1): p. 31-38.
112. Nel, L.H., et al., *Molecular epidemiology of rabies virus in South Africa*. *The Onderstepoort journal of veterinary research* % @ 0030-2465, 1993. **60**(4): p. 301-306.
113. Von Teichman, B.F., et al., *Molecular epidemiology of rabies virus in South Africa: Evidence for two distinct virus groups*. *Journal of General Virology* % @ 0022-1317, 1995. **76**(1): p. 73-82.
114. Hirano, S., et al., *Molecular epidemiology of rabies virus isolates in Uganda*. *Virus Research* % @ 0168-1702, 2010. **147**(1): p. 135-138.
115. Dacheux, L., et al., *More accurate insight into the incidence of human rabies in developing countries through validated laboratory techniques*. *PLoS Neglected Tropical Diseases*, 2010. **4**(11).
116. Johnson, N., et al., *A new outbreak of rabies in rare Ethiopian wolves (Canis simensis)*. *Archives of Virology* % @ 0304-8608, 2010. **155**(7): p. 1175-1177.
117. *New rabies virus found in Tanzania*. *The Veterinary record* % @ 2042-7670, 2012. **170**(12): p. 302 % U  
<http://www.embase.com/search/results?subaction=viewrecord&from=export&id=L366360528>  
<http://dx.doi.org/10.1136/vr.e2204>.

118. Kennedy, D.J.U.h.w.e.c.s.r.s.v., from=export, and L.h.d.d.o.v. id, *An outbreak of rabies in north-western Zimbabwe 1980 to 1983*. The Veterinary record % @ 0042-4900, 1988. **122**(6): p. 129-133.
119. Ali, Y.H.U.h.w.e.c.s.r.s.v., from=export, and L.h.d.d.o.v. id, *Outbreak of rabies in South Darfur, Sudan*. Veterinary Record % @ 0042-4900, 2002. **150**(19): p. 610-612.
120. Faizee, N., et al., *Pathological, Immunological and Molecular Diagnosis of Rabies in Clinically Suspected Animals of Different Species Using Four Detection Techniques in Jordan*. Transboundary and Emerging Diseases, 2012. **59**(2): p. 154-164.
121. Ogundare, E.O., et al., *Pattern and outcome of dog bite injuries among children in Ado-Ekiti, Southwest Nigeria*. Pan African Medical Journal % @ 1937-8688, 2017. **27**.
122. Diop, S.A., et al., *The point on human rabies in Senegal from 1986 to 2005*. Medecine et Maladies Infectieuses % @ 0399-077X 1769-6690, 2007. **37**(12): p. 787-791.
123. Coulibaly, N.D., et al., *Prevalence and control of zoonotic diseases: Collaboration between public health workers and veterinarians in Burkina Faso*. Acta Tropica % @ 0001-706X, 2000. **76**(1): p. 53-57.
124. Bloch, N., et al., *A probable outbreak of rabies in a group of camels in Niger*. Veterinary Microbiology % @ 0378-1135, 1995. **46**(1): p. 281-284.
125. Mallewa, M., et al., *Rabies encephalitis in malaria-endemic area, Malawi, Africa*. Emerging Infectious Diseases % @ 1080-6040 1080-6059, 2007. **13**(1): p. 136-139.
126. Burrows, R.U.h.w.e.c.s.r.s.v., from=export, and id=L, *Rabies in African wild dogs of Tanzania*. Journal of wildlife diseases % @ 0090-3558, 1994. **30**(2): p. 297-302.
127. Benelmouffok, A., et al., *Rabies in Algeria. Recrudescence and new epizootic aspect*. Comparative Immunology, Microbiology and Infectious Diseases % @ 0147-9571, 1982. **5**(1): p. 321-326.
128. Thomson, G.R., et al., *Rabies in bat-eared foxes in South Africa*. The Onderstepoort journal of veterinary research % @ 0030-2465, 1993. **60**(4): p. 399-403.
129. Fekadu, M.U.h.w.e.c.s.r.s.v., from=export, and id=L, *Rabies in Ethiopia*. American Journal of Epidemiology % @ 0002-9262, 1982. **115**(2): p. 266-273.
130. Depoux, R., et al., *Rabies in French Equatorial Africa during the past five years. I. Activities of the Pasteur Institute of Brazzaville in the detection of rabies*. Annales de l'Institut Pasteur % @ 0020-2444, 1958. **95**(3): p. 302-305.
131. Barnard, B.J., et al., *Rabies in kudu (Tragelaphus strepsiceros) in South West Africa/Namibia*. Journal of the South African Veterinary Association % @ 1019-9128, 1981. **52**(4): p. 309-314.
132. Gummow, B., Y.A.A. Roefs, and G.U.h.p.n.n.n.g. de Klerk, *Rabies in South Africa between 1993 and 2005--what has been achieved?* Journal of the South African Veterinary Association % @ 1019-9128, 2010. **81**(1): p. 16-21.
133. Gummow, B., et al., *Rabies in South Africa: epidemiological trends for the period 1980-1984*. Journal of the South African Veterinary Association % @ 1019-9128, 1986. **57**(4): p. 231-237.
134. Swanepoel, R., et al., *Rabies in southern Africa*. The Onderstepoort journal of veterinary research % @ 0030-2465, 1993. **60**(4): p. 325-346.
135. Botros, B.A.M., et al., *Rabies in the Arab republic of Egypt. A study of forty human cases*. Journal of the Egyptian Public Health Association, 1977. **52**(3): p. 171-183.
136. Hübschle, O.J.U.h.w.e.c.s.r.s.v., from=export, and id=L, *Rabies in the kudu antelope (Tragelaphus strepsiceros)*. Reviews of infectious diseases % @ 0162-0886, 1988. **10**: p. S629-633.
137. Balako, G., et al., *Rabies Outbreak among Livestock in a Pastoralist Community, Southern Ethiopia*. Ethiopian journal of health sciences % @ 2413-7170, 2018. **28**(6): p. 805-808.
138. Gumi, B., et al., *Rabies outbreak in village livestock and lack of post exposure vaccine seeking behavior in South Oromia pastoralist, Ethiopia*. Tropical Medicine and International Health % @ 1365-3156, 2017. **22**: p. 148.
139. Garba, A., et al., *Rabies' virus antigen in the brain of apparently healthy slaughtered dogs in Sokoto and Katsina States, Nigeria*. Nigerian Journal of Parasitology % @ 1117-4145, 2010. **31**(2): p. 123-125.

140. Tremlett, J.G., et al., *Rabies virus typing--preliminary survey in Botswana*. Tropical animal health and production % @ 0049-4747, 1994. **26**(3): p. 157-160.
141. Mkhize, G.C., et al., *Re-emergence of dog rabies in Mpumalanga Province, South Africa*. Vector-Borne and Zoonotic Diseases % @ 1530-3667, 2010. **10**(9): p. 921-926.
142. Mazigo, H.D., et al., *Retrospective analysis of suspected rabies cases reported at bugando referral hospital, mwanza, Tanzania*. Journal of global infectious diseases % @ 0974-8245 0974-777X, 2010. **2**(3): p. 216-220.
143. Dedkov, V.G., et al., *Retrospective diagnosis of two rabies cases in humans by high throughput sequencing*. Journal of Clinical Virology, 2016. **78**: p. 74-81.
144. Moagabo, K.T., et al., *A retrospective longitudinal study of animal and human rabies in Botswana 1989-2006*. Onderstepoort Journal of Veterinary Research % @ 0030-2465, 2009. **76**(4): p. 399-407.
145. Xu, G., et al., *A simple sandwich ELISA (WELYSSA) for the detection of lyssavirus nucleocapsid in rabies suspected specimens using mouse monoclonal antibodies*. Biologicals % @ 1045-1056 1095-8320, 2007. **35**(4): p. 297-302.
146. Zwart, D.U.h.w.e.c.s.r.s.v., from=export, and id=L, *Some epidemiological aspects of rabies in Nigeria and Ghana*. Bulletin de la Société de pathologie exotique et de ses filiales % @ 0037-9085, 1969. **62**(2): p. 259-263.
147. Swai, E.S., et al., *Spatial and temporal distribution of rabies in northern Tanzania in the period of 1993-2002*. Tanzania journal of health research % @ 1821-6404, 2010. **12**(1): p. 80-85.
148. Berry, H.H.U.h.w.e.c.s.r.s.v., from=export, and L.h.d.d.o.r. id, *Surveillance and control of anthrax and rabies in wild herbivores and carnivores in Namibia*. Revue scientifique et technique (International Office of Epizootics) % @ 0253-1933, 1993. **12**(1): p. 137-146.
149. Andriamandimby, S.F., et al., *Surveillance and control of rabies in La Reunion, Mayotte, and Madagascar*. Veterinary research % @ 1297-9716 0928-4249, 2013. **44**(1): p. 77-77.
150. Frey, J., et al., *Survey of animal bite injuries and their management for an estimate of human rabies deaths in N'Djaména, Chad*. Tropical Medicine and International Health % @ 1360-2276 1365-3156, 2013. **18**(12): p. 1555-1562.
151. Obonyo, M.O., et al., *Suspected rabies in humans and animals, Laikipia county, Kenya*. Emerging Infectious Diseases % @ 1080-6059 1080-6040, 2016. **22**(3): p. 551-553.
152. Tekki, I.S., et al., *Tissue culture isolation of lyssa viruses from apparently healthy unvaccinated dogs in Nigeria*. African journal of medicine and medical sciences % @ 0309-3913, 2014. **43**: p. 143-149.
153. Coetzee, P., et al., *Use of a molecular epidemiological database to track human rabies case histories in South Africa*. Epidemiology and Infection % @ 0950-2688 1469-4409, 2008. **136**(9): p. 1270-1276.
154. Mani, R.S., et al., *Utility of real-time Taqman PCR for antemortem and postmortem diagnosis of human rabies*. Journal of medical virology, 2014. **86**(10): p. 1804-1812.
155. Röttcher, D., et al., *Wildlife rabies in Zambia*. Journal of wildlife diseases % @ 0090-3558, 1978. **14**(4): p. 513-517.
156. Adeiga, A.A., *MOLECULAR STUDY OF NUCLEOPROTEIN GENE OF RABIES VIRUS ISOLATES FROM DOG BRAINS*. African Journal of Clinical and Experimental Microbiology, 2002. **3**(2): p. 48-54.
157. Ahmad, I., et al., *Human death from suspected rabid dog bite in Zamfara State, Nigeria*. Sokoto Journal of Veterinary Sciences, 2018. **16**(4): p. 92-95.
158. Awah, N.J., J. Tchoumboue, and J.C. Tong, *Canine and Human Rabies in Cameroon*. Tropical Veterinarian, 2002. **20**(3): p. 162-168.
159. Awah-Ndukum, J., *Ecological aspects of dogs in relation to rabies control and public health significance in North-west Cameroon*. Journal of the Cameroon Academy of Sciences, 2003. **3**(1): p. 25-40.
160. Bello, M., B.M. Lukshi, and B. Usman, *A Fifteen-Year Retrospective Study Of The Prevalence Of Rabies In Bauchi State, Nigeria*. Nigerian Veterinary Journal, 2007. **28**(2): p. 18-23.
161. Bolajoko, M.B., et al., *Assessment of risk factors responsible for canine rabies in Oyo State, Nigeria*. Sokoto Journal of Veterinary Sciences, 2019. **17**(1): p. 82-85.

162. Bwangamoi, O., D. Rottcher, and C. Wekesa, *Rabies, Microbesnoitosis and Sarcosystosis in a Lioness From Nairobi National Park*. Kenya Veterinarian, 1991. **15**: p. 55-60.
163. Coetzer, A., et al., *Epidemiological aspects of a persistent transmission of rabies during an outbreak (2010 – 2017) in the capital city of Zimbabwe, Harare*. 2018.
164. Dzikwi, A.A., et al., *Serological Surveillance for Non-Rabies Lyssaviruses among Apparently Healthy Dogs in Zaria, Nigeria*. Nigerian Veterinary Journal, 2010. **31**(3).
165. Ebuy, Y., et al., *Community knowledge, attitude and practice on rabies, incidence in humans and animals and risk factors to rabies in selected districts of Tigray Region, Ethiopia*. Nigerian Veterinary Journal, 2019. **40**(2): p. 147-163.
166. Ehizibolo, D.O., et al., *Diagnosis of canine rabies by the direct fluorescent antibody technique in Plateau State, Nigeria*. Nigerian Veterinary Journal, 2008. **29**(2): p. 20-24.
167. Gum, B., et al., *Assessment of retrospective rabies suspected cases registered at two hospitals, community and traditional healers' knowledge, attitude and practices in south Ethiopian pastoralist*. Ethiopian Veterinary Journal, 2019. **23**(2): p. 77-89.
168. Kabaso, J., et al., *Rabies trends and surveillance capabilities in Zambia*. Tanzania Veterinary Journal, 2015. **30**(1): p. 21-32.
169. Kennedy, D.J., *An outbreak of rabies in north-western Zimbabwe 1980 to 1983*. The Veterinary Record, 1988. **122**(6): p. 129-133.
170. Kessy, I.P., *Rabies, the neglected cause of mortality in developing countries*. Dar Es Salaam Medical Students' Journal, 2012. **19**(2): p. 13-16.
171. Khalsi, F., et al., *Rabies encephalitis in children: a resurgence of a fatal anthrozoosis*. African Health Sciences, 2018. **18**(3): p. 539-541.
172. Matondo, A.B., *Evidences of declining rabies: a retrospective study of cumulative clinical data at Sokoine University Animal Hospital, Tanzania*. Tanzania Veterinary Journal, 2019. **34**(1): p. 9-17.
173. Meredith, C.D., A.P. Prossouw, and H.v.P. Koch, *An unusual case of human rabies thought to be of chiropteran origin*. South African Medical Journal = Suid-Afrikaanse Tydskrif Vir Geneeskunde, 1971. **45**(28): p. 767-769.
174. Musako, C., et al., *Methods for Estimating the Risk of Rabies Transmission to Humans in the Lake Victoria Zone, Tanzania*. Tanzania Veterinary Journal, 2018. **33**(1): p. 10-23.
175. Ogo, M.F., L.H. Nel, and C.T. Sabeta, *Phylogenetic Evidence of the Public and Veterinary Health Threat of Dog Rabies in Nigeria*. Nigerian Veterinary Journal, 2011. **32**(1).
176. Ojo, D.T., et al., *Rabies in Nigeria: A review of literature*. African Journal of Clinical and Experimental Microbiology, 2016. **17**(2): p. 159-163.
177. Okpe, E.S., et al., *Childhood Rabies: A 10 Year Review of Management and Outcome in a Tertiary Centre*. Journal of Medicine in the Tropics, 2011. **13**(1).
178. Reuter, K.E., et al., *Rabies in primates: are aggressive pet lemurs a risk to humans?* Madagascar Conservation & Development, 2018. **13**(1): p. 53-59.
179. Thaiyah, A.G., G.K. Gitau, and J.T. Mugambi, *Outbreak of Bovine Rabies in Kiambu District, Kenya*. Kenya Veterinarian, 2001. **21**: p. 10-11.
180. Wiwanitkit, V., *Stray dog meat consumption and rabies*. African Health Sciences, 2014. **14**(3): p. 777-777.
181. Yimer, E., et al., *Situation of Rabies in Ethiopia: A retrospective study 1990-2000*. Ethiopian Journal of Health Development, 2002. **16**(1): p. 105-112.
182. Hamir, A.N., et al., *Absence of rabies encephalitis in a raccoon with concurrent rabies and canine distemper infections*. The Cornell veterinarian, 1990. **80**(2): p. 197-201.
183. Serra-Cobo, J., et al., *Active sero-survey for European bat lyssavirus type-1 circulation in North African insectivorous bats*. Emerging Microbes and Infections % @ 2222-1751, 2018. **7**(1).
184. Tiembré, I., et al., *Adherence to rabies vaccine treatment for people exposed to rabies in Abidjan (Côte d' Ivoire)*. Sante publique (Vandoeuvre-les-Nancy, France) % @ 0995-3914, 2009. **21**(6): p. 595-603.
185. Joshua, I.A., et al., *Analysis of 4-year dog-bite cases treated at ahmadu bello university health centre, Zaria, Nigeria*. TAF Preventive Medicine Bulletin % @ 1303-734X, 2012. **11**(6): p. 661-666.

186. Gautret, P., et al., *Animal-associated exposure to rabies virus among travelers, 1997–2012*. Emerging Infectious Diseases % @ 1080-6059 1080-6040, 2015. **21**(4): p. 569-577.
187. Khashei, B., et al., *Ante-mortem diagnosis of human rabies cases using SYBR green real-time PCR*. Archives of Iranian Medicine, 2018. **21**(10): p. 473-477.
188. Kelly, P.J., et al., *Antibodies reactive with Bartonella henselae and Ehrlichia canis in dogs from the communal lands of Zimbabwe*. Journal of the South African Veterinary Association % @ 2224-9435 1019-9128, 2004. **75**(3): p. 116-120.
189. Ngoepe, E., et al., *Antigenic characterisation of lyssaviruses in South Africa*. The Onderstepoort journal of veterinary research % @ 2219-0635, 2014. **81**(1).
190. Aghomo, H.O., et al., *Antigenic characterisation of virus isolates from vaccinated dogs dying of rabies*. Tropical animal health and production % @ 0049-4747, 1990. **22**(4): p. 275-280.
191. Rollin, P.E., et al., *Antigenic characteristics of strains of rabies isolated in Madagascar*. Archives de l'Institut Pasteur de Madagascar % @ 0020-2495, 1984. **51**(1): p. 105-111.
192. Okoh, A.E.U.h.w.e.c.s.r.s.v., from=export, and id=L, *Antigenic characterization of rabies virus isolates from vaccinated dogs in plateau state, Nigeria*. Veterinary research communications % @ 0165-7380, 2000. **24**(3): p. 203-211.
193. Umoh, J.U., et al., *Antigenic characterization of street rabies virus isolates from Nigeria using monoclonal antibodies*. Zentralblatt für Veterinärmedizin. Reihe B. Journal of veterinary medicine. Series B % @ 0514-7166, 1990. **37**(3): p. 222-228.
194. Coulon, P., et al., *Antigenic variants of the rabies virus. Selection with antiglycoprotein monoclonal antibodies*. Archives de l'Institut Pasteur de Tunis % @ 0020-2509, 1982. **59**(1): p. 105-113.
195. Kagira, J.M. and P.W.N.U.h.p.n.n.n.g. Kanyari, *AN APPRAISAL OF RABIES OCCURRENCE AND CONTROL IN KISUMU MUNICIPALITY, KENYA*. East African medical journal % @ 0012-835X, 2012. **89**(2): p. 59-63.
196. Zimmer, B.L., et al., *Assessment of the impact on paediatric rabies at Queen Elizabeth Central Hospital, Blantyre, Malawi, following a mass canine rabies vaccination programme*. International Journal of Infectious Diseases % @ 1878-3511 1201-9712, 2019. **79**: p. 64.
197. Fekadu, M.U.h.w.e.c.s.r.s.v., from=export, and id=L, *Atypical rabies in dogs in Ethiopia*. Ethiopian Medical Journal % @ 0014-1755, 1972. **10**(3): p. 79-86.
198. Foggin, C.M.U.h.w.e.c.s.r.s.v., from=export, and L.h.d.d.o.v. id, *Atypical rabies virus in cats and a dog in Zimbabwe*. The Veterinary record % @ 0042-4900, 1982. **110**(14): p. 338.
199. Ogola, E., et al., *Atypical rabies: A case report from a rabies outbreak in kenya*. American Journal of Tropical Medicine and Hygiene % @ 0002-9637, 2012. **87**(5): p. 80-81.
200. Nokireki, T., et al., *Bat rabies surveillance in Finland*. BMC Veterinary Research, 2013. **9**.
201. Sambo, M., et al., *The Burden of Rabies in Tanzania and Its Impact on Local Communities*. PLoS Neglected Tropical Diseases % @ 1935-2735 1935-2727, 2013. **7**(11).
202. Sambo, M., et al., *The burden of rabies in Tanzania and its impact on local communities*. American Journal of Tropical Medicine and Hygiene % @ 0002-9637, 2014. **91**(5): p. 24.
203. King, A.A., et al., *Canid and viverrid rabies viruses in South Africa*. The Onderstepoort journal of veterinary research % @ 0030-2465, 1993. **60**(4): p. 295-299.
204. Okoh, A.E.U.h.p.n.n.n.g., *Canine rabies in Nigeria, 1970 - 1980 reported cases in vaccinated dogs*. International journal of zoonoses % @ 0377-0168, 1982. **9**(2): p. 118-125.
205. Zimmer, B.L., et al., *Canine rabies vaccination reduces child rabies cases in Malawi*. The Lancet % @ 1474-547X 0140-6736, 2018. **392**(10153): p. 1115-1116.
206. Proudfoot, S.M.U.h.w.e.c.s.r.s.v., from=export, and id=L, *Case study: rabies in Nigeria*. Nursing mirror and midwives journal % @ 0143-2524, 1972. **135**(13): p. 38-41.
207. Okolo, M.I.U.h.w.e.c.s.r.s.v., from=export, and id=L, *Cerebral cysticercosis in rural dogs*. Microbios % @ 0026-2633, 1986. **47**(192): p. 189-191.
208. Baer, G.M., et al., *Characteristics of 11 rabies virus isolates in mice: titers and relative invasiveness of virus, incubation period of infection, and survival of mice with sequelae*. Journal of Infectious Diseases, 1977. **136**(3): p. 336-345.
209. Reynes, J.M., et al., *Characterization and observation of animals responsible for rabies post-exposure treatment in Phnom Penh, Cambodia*. The Onderstepoort journal of veterinary research % @ 0030-2465, 1999. **66**(2): p. 129-133.

210. Ghiwot, T.T., et al., *Community health seeking behavior for suspected human and animal rabies cases, Gomma district, southwest Ethiopia*. PLoS ONE % @ 1932-6203, 2016. **11**(3).
211. Wacharapluesadee, S., et al., *Comparative detection of rabies RNA by NASBA, real-time PCR and conventional PCR*. Journal of Virological Methods % @ 0166-0934 1879-0984, 2011. **175**(2): p. 278-282.
212. Bahloul, C., et al., *Comparative evaluation of specific ELISA and RFFIT antibody assays in the assessment of dog immunity against rabies*. Epidemiology and Infection % @ 0950-2688, 2005. **133**(4): p. 749-757.
213. Scott, T.P., et al., *Complete Genome and Molecular Epidemiological Data Infer the Maintenance of Rabies among Kudu (Tragelaphus strepsiceros) in Namibia*. PLoS ONE % @ 1932-6203, 2013. **8**(3).
214. Horton, D.L., et al., *Complex Epidemiology of a Zoonotic Disease in a Culturally Diverse Region: Phylogeography of Rabies Virus in the Middle East*. PLoS Neglected Tropical Diseases % @ 1935-2735 1935-2727, 2015. **9**(3).
215. Tiembré, I., et al., *Compliance with veterinary surveillance orders at the rabies control center in Abijan, Ivory Coast*. Medecine Tropicale % @ 0025-682X, 2008. **68**(5): p. 514-518.
216. Hatch, C., et al., *A descriptive study of urban rabies during the civil war in Sierra Leone: 1995-2001*. Tropical animal health and production % @ 0049-4747, 2004. **36**(4): p. 321-334.
217. Bouchrit, N., et al., *Determining factors for human rabies in Morocco: Genetic variability, vaccine quality, or inadequate management*. Medecine et Maladies Infectieuses % @ 0399-077X, 2002. **32**(9): p. 508-513.
218. Tiembre, I., et al., *Discontinuation of postexposure prophylaxis at the anti-rabies Center of Abidjan, Côte d'Ivoire*. Bulletin de la Societe de Pathologie Exotique % @ 0037-9085, 2013. **106**(4): p. 272-277.
219. Hergert, M., et al., *Dog Bite Histories and Response to Incidents in Canine Rabies-Enzootic KwaZulu-Natal, South Africa*. PLoS Neglected Tropical Diseases % @ 1935-2735 1935-2727, 2013. **7**(4).
220. Kubheka, V., et al., *Dog bites and human rabies in the Uthungulu District of KwaZulu-Natal province, 2008-2010: A review of surveillance data*. Southern African Journal of Epidemiology and Infection % @ 1015-8782 2220-1084, 2013. **28**(1): p. 33-40.
221. Mbilo, C., et al., *Dog ecology, bite incidence, and disease awareness: A cross-sectional survey among a rabies-affected community in the democratic republic of the congo*. Vaccines % @ 2076-393X, 2019. **7**(3).
222. Odita, C.I., et al., *Dog owners' attitude, a risk factor for human rabies in Nigeria Rabies in Nigeria*. American Journal of Tropical Medicine and Hygiene % @ 0002-9637, 2017. **97**(5): p. 573-574.
223. Tepsumethanon, V., et al., *Dogs that develop rabies post-vaccination usually manifest the paralytic subtype*. Preventive Veterinary Medicine, 2016. **131**: p. 64-66.
224. Tefera, G., et al., *Endemic existence of rabies in Ethiopia*. Ethiopian medical journal % @ 0014-1755, 2002. **40**(2): p. 163-170.
225. Coetzer, A., et al., *Enhanced diagnosis of rabies and molecular evidence for the transboundary spread of the disease in Mozambique*. Journal of the South African Veterinary Association % @ 2224-9435 1019-9128, 2017. **88**(1).
226. Patrick, E.M., et al., *Enhanced Rabies Surveillance Using a Direct Rapid Immunohistochemical Test*. Journal of visualized experiments : JoVE % @ 1940-087X, 2019(146).
227. Tiembré, I., et al., *The epidemiological profile of subjects exposed to rabies in Abidjan, Ivory Coast*. Sante publique (Vandoeuvre-les-Nancy, France) % @ 0995-3914, 2011. **23**(4): p. 279-286.
228. Schneider, R., et al., *EPIDEMIOLOGICAL RESEARCH ON RABIES IN THE CITY OF TUNIS*. Archives de l'Institut Pasteur de Tunis % @ 0020-2509, 1963. **40**: p. 371-383.
229. Edelsten, R.M.U.h.w.e.c.s.r.s.v., from=export, and id=L, *Epidemiology and control of rabies in Malawi*. Tropical animal health and production % @ 0049-4747, 1995. **27**(3): p. 155-163.



230. Cohen, C., et al., *Epidemiology and molecular virus characterization of reemerging rabies, South Africa*. Emerging Infectious Diseases % @ 1080-6040 1080-6059, 2007. **13**(12): p. 1879-1886.
231. Ngugi, J.N., et al., *Epidemiology and surveillance of human animal-bite injuries and rabies post-exposure prophylaxis, in selected counties in Kenya, 2011-2016*. BMC public health % @ 1471-2458, 2018. **18**(1): p. 996.
232. Fèvre, E.M., et al., *The epidemiology of animal bite injuries in Uganda and projections of the burden of rabies*. Tropical Medicine and International Health % @ 1360-2276, 2005. **10**(8): p. 790-798.
233. Ramos, J.M., et al., *Epidemiology of animal bites and other potential rabies exposures and anti-rabies vaccine utilization in a rural area in southern Ethiopia*. Tropical Medicine and International Health % @ 1360-2276, 2011. **16**: p. 322-323.
234. Ghanghro, A., et al., *Epidemiology of dog bites during floods in District Naushahro Feroze, Sind, Pakistan, 2010*. International Journal of Infectious Diseases % @ 1201-9712, 2014. **21**: p. 391.
235. Yahiaoui, F., et al., *The epidemiology of dog rabies in Algeria: Retrospective national study of dog rabies cases, determination of vaccination coverage and immune response evaluation of three commercial used vaccines*. Preventive Veterinary Medicine % @ 0167-5877, 2018. **158**: p. 65-70.
236. Kardjadj, M., et al., *Epidemiology of dog-mediated zoonotic diseases in Algeria: a One Health control approach*. New Microbes and New Infections % @ 2052-2975, 2019. **28**: p. 17-20.
237. Noah, D.L., et al., *Epidemiology of human rabies in the United States, 1980 to 1996*. Annals of Internal Medicine, 1998. **128**(11): p. 922-930.
238. Benelmouffok, A., et al., *Epidemiology of rabies in Algeria*. Archives de l'Institut Pasteur d'Algérie Institut Pasteur d'Algérie % @ 0020-2460, 1978. **53**: p. 143-154.
239. Al Abaidani, I., et al., *Epidemiology of rabies in Oman: A retrospective study (1991–2013)*. Eastern Mediterranean Health Journal % @ 1020-3397, 2015. **21**(8): p. 591-597.
240. Chadli, A., et al., *Epidemiology of rabies in Tunisia. Comparative study of results from the last 28 years*. Archives de l'Institut Pasteur de Tunis % @ 0020-2509, 1982. **59**(1): p. 5-21.
241. Bingham, J., et al., *The epidemiology of rabies in Zimbabwe. 1. Rabies in dogs (Canis familiaris)*. The Onderstepoort journal of veterinary research % @ 0030-2465, 1999. **66**(1): p. 1-10.
242. Beyene, T.J., et al., *Estimating the burden of rabies in Ethiopia by tracing dog bite victims*. PLoS ONE % @ 1932-6203, 2018. **13**(2).
243. Cassel-Beraud, A.M., et al., *Evaluation of 30-year-activity of the Virology Laboratory of the Pasteur Institute in Madagascar (1958-1987)*. Archives de l'Institut Pasteur de Madagascar % @ 0020-2495, 1989. **56**(1): p. 177-220.
244. Voehl, K.M., et al., *Evaluation of a rapid immunodiagnostic rabies field surveillance test on samples collected from military operations in Africa, Europe, and the Middle East*. U.S. Army Medical Department journal % @ 1524-0436, 2014: p. 27-32.
245. Markotter, W., et al., *Evaluation of a rapid immunodiagnostic test kit for detection of African lyssaviruses from brain material*. Onderstepoort Journal of Veterinary Research % @ 0030-2465, 2009. **76**(2): p. 257-262.
246. Yilmaz, F., et al., *Evaluation of cases with rabies risk presenting to emergency department*. Journal of Clinical and Analytical Medicine, 2014. **5**(1): p. 8-11.
247. Sabeta, C.T., et al., *An evaluation of dog rabies control in Limpopo province (South Africa)*. Epidemiology and Infection % @ 0950-2688 1469-4409, 2011. **139**(10): p. 1470-1475.
248. Eggerbauer, E., et al., *Evaluation of Six Commercially Available Rapid Immunochromatographic Tests for the Diagnosis of Rabies in Brain Material*. PLoS Neglected Tropical Diseases % @ 1935-2735 1935-2727, 2016. **10**(6).
249. Doege, T.C., et al., *Evidence for inapparent rabies infection*. Lancet % @ 0140-6736, 1974. **2**(7884): p. 826-829.
250. Davis, P.L., et al., *The evolutionary dynamics of canid and mongoose rabies virus in southern Africa*. Archives of Virology % @ 0304-8608, 2007. **152**(7): p. 1251-1258.

251. Talbi, C., et al., *Evolutionary history and dynamics of dog rabies virus in western and central Africa*. Journal of General Virology % @ 0022-1317 1465-2099, 2009. **90**(4): p. 783-791.
252. Van Zyl, N., et al., *Evolutionary history of African mongoose rabies*. Virus Research % @ 0168-1702, 2010. **150**(1): p. 93-102.
253. Fekadu, M., J.H. Shaddock, and G.M.U.h.p.n.n.g. Baer, *Excretion of rabies virus in the saliva of dogs*. The Journal of infectious diseases % @ 0022-1899, 1982. **145**(5): p. 715-719.
254. Ratho, R.K., et al., *Experience of human rabies in north India*. Indian Journal of Pathology and Microbiology, 2001. **44**(1): p. 41-44.
255. Ben Salem, K., et al., *Exposure to rabies in Monastir (Tunisia): Assessing the quality of care*. Medecine et Maladies Infectieuses % @ 0399-077X, 1999. **29**(11): p. 682-688.
256. Kazadi, E.K., et al., *Factors of rabies maintenance in dog population in Kinshasa, Democratic Republic of Congo (DRC)*. International Journal of Infectious Diseases % @ 1878-3511 1201-9712, 2019. **79**: p. 56.
257. Kitala, P.M., et al., *Features of dog ecology relevant to rabies spread in Machakos District, Kenya*. The Onderstepoort journal of veterinary research % @ 0030-2465, 1993. **60**(4): p. 445-449.
258. Brückner, G.K., L.R. Hurter, and J.N.U.h.p.n.n.g. Boshoff, *Field observations on the occurrence of rabies in cattle in the magisterial districts of Soutpansberg and Messina*. Journal of the South African Veterinary Association % @ 1019-9128, 1978. **49**(1): p. 33-36.
259. Ahmad, I., et al., *First confirmation of rabies in Zamfara State, Nigeria-in a sheep*. Tropical animal health and production % @ 1573-7438, 2017. **49**(3): p. 659-662.
260. Suluku, R., et al., *First reported case of dog associated cattle rabies in Koinadugu district, Northern Sierra Leone*. African Journal of Biomedical Research % @ 1119-5096, 2017. **20**(3): p. 325-327.
261. Tasiame, W., et al., *First reported case of dog associated pig rabies in Ghana*. African Journal of Infectious Diseases % @ 2006-0165, 2016. **10**(1): p. 55-57.
262. Hassan, I.C.U.h.w.e.c.s.r.s.v., from=export, and id=L, *A five-year analysis of diseases of dogs and cats in the Veterinary Clinic of Freetown, Sierra Leone*. Beiträge zur tropischen Landwirtschaft und Veterinärmedizin % @ 0301-567X, 1984. **22**(3): p. 305-308.
263. Aghomo, H.O., et al., *Further studies on rabies virus isolated from healthy dogs in Nigeria*. Veterinary Microbiology % @ 0378-1135, 1990. **22**(1): p. 17-22.
264. Faouzi, A., et al., *Genetic diversity of human rabies virus isolated during 2000-2008 in Morocco*. Clinical Microbiology and Infection % @ 1198-743X, 2009. **15**: p. S122.
265. Muleya, W., et al., *Genetic diversity of rabies virus in different host species and geographic regions of Zambia and Zimbabwe*. Virus Genes % @ 1572-994X 0920-8569, 2019. **55**(5): p. 713-719.
266. Lee, H.S., et al., *Geographical and temporal patterns of rabies post exposure prophylaxis (PEP) incidence in humans in the mekong river delta and southeast central coast regions in Vietnam from 2005 to 2015*. PLoS ONE % @ 1932-6203, 2018. **13**(4).
267. Rajeev, M., et al., *Healthcare utilization, provisioning of post-exposure prophylaxis, and estimation of human rabies burden in Madagascar*. Vaccine % @ 1873-2518, 2019. **37**: p. A35-A44.
268. Johnson, N., et al., *Human rabies due to lyssavirus infection of bat origin*. Veterinary Microbiology, 2010. **142**(3): p. 151-159.
269. Farahtaj, F., et al., *Human rabies in Iran*. Tropical doctor % @ 1758-1133, 2014. **44**(4): p. 226-229.
270. Sow, P.S., et al., *Human rabies in Senegal: epidemiological and clinical aspects*. Dakar médical % @ 0049-1101, 1991. **36**(2): p. 105-111.
271. Anderson, L.J., et al., *Human rabies in the United States, 1960 to 1979: Epidemiology, diagnosis, and prevention*. Annals of Internal Medicine, 1984. **100**(5): p. 728-735.
272. Diallo, M.K., et al., *Human rabies post exposure prophylaxis at the Pasteur Institute of Dakar, Senegal: Trends and risk factors*. BMC Infectious Diseases % @ 1471-2334, 2019. **19**(1).

273. Muyila, D.I., et al., *Human rabies: A descriptive observation of 21 children in Kinshasa, The democratic republic of Congo*. Pathogens and Global Health % @ 2047-7732 2047-7724, 2014. **108**(7): p. 317-322.
274. Centers for Disease, C.U.h.p.n.n.n.g., *Human rabies--Kenya*. MMWR. Morbidity and mortality weekly report % @ 0149-2195, 1983. **32**(38): p. 494-495.
275. Centers for Disease, C.U.h.p.n.n.n.g., *Human rabies--Rwanda*. MMWR. Morbidity and mortality weekly report % @ 0149-2195, 1982. **31**(10): p. 135-135.
276. Chitanga, S., et al., *Identification and genetic characterization of tick-borne zoonotic Anaplasma species in dogs in Lusaka, Zambia*. Tropical Medicine and International Health % @ 1365-3156, 2017. **22**: p. 143.
277. Mindekem, R., et al., *Impact of canine demography on rabies transmission in N'djamena, Chad*. Médecine tropicale : revue du Corps de santé colonial % @ 0025-682X, 2005. **65**(1): p. 53-58.
278. Sabeta, C.T., et al., *Importation of canid rabies in a horse relocated from Zimbabwe to South Africa*. Onderstepoort Journal of Veterinary Research % @ 0030-2465, 2005. **72**(1): p. 95-100.
279. Servas, V., et al., *An imported case of canine rabies in Aquitaine: investigation and management of the contacts at risk, August 2004-March 2005*. Euro surveillance : bulletin européen sur les maladies transmissibles = European communicable disease bulletin % @ 1560-7917, 2005. **10**(11): p. 222-225.
280. Coertse, J., et al., *Improved PCR methods for detection of african rabies and rabies-related lyssaviruses*. Journal of Clinical Microbiology % @ 0095-1137 1098-660X, 2010. **48**(11): p. 3949-3955.
281. Jibat, T., M.C.M. Mourits, and H.U.h.p.n.n.n.g. Hogeveen, *Incidence and economic impact of rabies in the cattle population of Ethiopia*. Preventive veterinary medicine % @ 1873-1716, 2016. **130**: p. 67-76.
282. Aghahowa, S.E., et al., *Incidence of dog bite and anti-rabies vaccine utilization in the, University of Benin Teaching Hospital, Benin City, Nigeria: A 12-year assessment*. Vaccine % @ 0264-410X, 2010. **28**(30): p. 4847-4850.
283. Jemberu, W.T., et al., *Incidence of Rabies in Humans and Domestic Animals and People's Awareness in North Gondar Zone, Ethiopia*. PLoS Neglected Tropical Diseases % @ 1935-2735 1935-2727, 2013. **7**(5).
284. Mulipukwa, C.P., et al., *Insights and efforts to control rabies in Zambia: Evaluation of determinants and barriers to dog vaccination in Nyimba district*. PLoS Neglected Tropical Diseases % @ 1935-2735 1935-2727, 2017. **11**(10).
285. Bingham, J., et al., *Jackal rabies in Zimbabwe*. The Onderstepoort journal of veterinary research % @ 0030-2465, 1993. **60**(4): p. 365-366.
286. Suu-Ire, R.D., et al., *Lagos Bat Virus Infection Dynamics in Free-Ranging Straw-Colored Fruit Bats (Eidolon helvum)*. Tropical medicine and infectious disease % @ 2414-6366, 2017. **2**(3): p. 25.
287. *Leads from the MMWR. Human rabies--Kenya*. JAMA : the journal of the American Medical Association % @ 0098-7484, 1983. **250**(15): p. 1957-1958 %U <http://www.embase.com/search/results?subaction=viewrecord&from=export&id=L13728576>.
288. Baldi, M., et al., *Leptospira Seroprevalence Detection and Rabies Virus Absence in an Urban Raccoon (Procyon lotor) Population in a Highly Populated Area, Costa Rica*. Vector-Borne and Zoonotic Diseases, 2019. **19**(12): p. 889-895.
289. Zhao, L., et al., *Letter to the editor in response to 'Molecular detection of rabies virus strain with N-gene that clustered with China lineage 2 co-circulating with Africa lineages in Monrovia, Liberia: First reported case in Africa'*. Epidemiology and Infection % @ 1469-4409 0950-2688, 2019.
290. Macadam, I.U.h.w.e.c.s.r.s.v., from=export, and L.h.d.d.o.v. id, *Letter: Rabies in the Gambia*. The Veterinary record % @ 0042-4900, 1975. **97**(9): p. 171.
291. Esterhuysen, J.J., et al., *A liquid-phase blocking ELISA for the detection of antibodies to rabies virus*. Journal of Virological Methods % @ 0166-0934, 1995. **51**(1): p. 31-42.

292. Masiira, B., et al., *Long term trends and spatial distribution of animal bite injuries and deaths due to human rabies infection in Uganda, 2001-2015*. PLoS ONE % @ 1932-6203, 2018. **13**(8).
293. Cleaveland, S., et al., *Maintenance of a microparasite infecting several host species: Rabies in the Serengeti*. Parasitology % @ 0031-1820, 1995. **111**: p. S33-S47.
294. Mebatsion, T., et al., *Molecular analysis of rabies-related viruses from Ethiopia*. The Onderstepoort journal of veterinary research % @ 0030-2465, 1993. **60**(4): p. 289-294.
295. Traoré, A., et al., *Molecular Characterization of Canine Rabies Virus, Mali, 2006-2013*. Emerging infectious diseases % @ 1080-6059 1080-6040, 2016. **22**(5): p. 866-870.
296. Amouri, I.K., et al., *Molecular characterization of rabies virus isolated from dogs in Tunisia: Evidence of two phylogenetic variants*. Virus Research % @ 0168-1702 1872-7492, 2011. **158**(1): p. 246-250.
297. Nuovo, G.J., et al., *Molecular detection of rabies encephalitis and correlation with cytokine expression*. Modern Pathology, 2005. **18**(1): p. 62-67.
298. McElhinney, L.M., et al., *Molecular epidemiology of lyssaviruses in Eurasia*. Developments in biologicals % @ 1424-6074, 2008. **131**: p. 125-131.
299. Pant, G.R.U.h.w.e.c.s.r.s.v., from=export, and L.h.d.d.o.j.i. id, *Molecular epidemiology of rabies virus in Nepal*. International Journal of Infectious Diseases % @ 1201-9712, 2014. **21**: p. 195.
300. Zulu, G.C., et al., *Molecular epidemiology of rabies: Focus on domestic dogs (Canis familiaris) and black-backed jackals (Canis mesomelas) from northern South Africa*. Virus Research % @ 0168-1702, 2009. **140**(1): p. 71-78.
301. Kuzmin, I.V., et al., *Molecular epidemiology of terrestrial rabies in the former Soviet Union*. Journal of Wildlife Diseases % @ 0090-3558, 2004. **40**(4): p. 617-631.
302. Sabeta, C.T., et al., *Mongoose rabies and the African civet in Zimbabwe*. Veterinary Record % @ 0042-4900, 2008. **163**(19): p. 580.
303. Nel, L.H., et al., *Mongoose rabies in southern Africa: A re-evaluation based on molecular epidemiology*. Virus Research % @ 0168-1702, 2005. **109**(2): p. 165-173.
304. Sawchuk, A.M., et al., *Mongoose rabies in Zambia*. Journal of wildlife diseases % @ 0090-3558, 1978. **14**(1): p. 54-55.
305. Mueller, W.W., et al., *Natural resistance of an African rodent Praomys (Mastomys) natalensis to rabies infection*. COLLECT.ANN.INST.PASTEUR, 1976. **127**(3): p. 447-453.
306. Selimov, M.A., et al., *New strains of rabies-related viruses isolated from bats in the Ukraine*. Acta virologica % @ 0001-723X, 1991. **35**(3): p. 226-231.
307. Pieracci, E.G., et al., *Notes from the Field: Assessment of Health Facilities for Control of Canine Rabies - Gondar City, Amhara Region, Ethiopia, 2015*. MMWR. Morbidity and mortality weekly report % @ 1545-861X, 2016. **65**(17): p. 456-457.
308. Nyakarahuka, L., et al., *Occurrence and mortality rates from rabies in Uganda, 2001- 2009*. International Journal of Infectious Diseases % @ 1201-9712, 2012. **16**: p. e458.
309. Martínez-Burnes, J., et al., *An outbreak of vampire bat-transmitted rabies in cattle in northeastern Mexico*. Canadian Veterinary Journal, 1997. **38**(3): p. 175-177.
310. Sreenivasan, N., et al., *Overview of rabies post-exposure prophylaxis access, procurement and distribution in selected countries in Asia and Africa, 2017–2018*. Vaccine % @ 1873-2518 0264-410X, 2019. **37**: p. A6-A13.
311. Redwan, E.-R.M., et al., *Ovine anti-rabies antibody production and evaluation*. Comparative immunology, microbiology and infectious diseases % @ 1878-1667, 2009. **32**(1): p. 9-19.
312. Beck, S., et al., *Pathobiological investigation of naturally infected canine rabies cases from Sri Lanka*. BMC Veterinary Research, 2017. **13**(1).
313. Hananeh, W.M., et al., *Pathological and molecular diagnosis of rabies in clinically suspected food animals using different diagnostic tests*. Large Animal Review, 2015. **21**(6): p. 243-250.
314. Marston, D.A., et al., *Phylogenetic analysis of rabies viruses from Sudan provides evidence of a viral clade with a unique molecular signature*. Virus Research % @ 0168-1702, 2009. **145**(2): p. 244-250.

315. Morters, M.K., et al., *Phylogenetic and phylogeographic analysis of viral surveillance data to inform rabies control programmes in Cambodia*. *Virus Evolution* % @ 2057-1577, 2017. **3**: p. S4.
316. Harvey, K., et al., *Possible rabies exposures in peace corps volunteers, 2011*. *American Journal of Tropical Medicine and Hygiene* % @ 0002-9637, 2014. **90**(5): p. 902-907.
317. Belludi, Y.B.Y.U.h.w.e.c.s.r.s.v., from=export, and L.h.d.d.o.o.o. id, *Post-exposure prophylaxis for animal bites: A low cost model for enhancing reach and affordability of biologicals in high burden countries*. *Open Forum Infectious Diseases* % @ 2328-8957, 2017. **4**: p. S684.
318. Monson, M.H.U.h.p.n.n.n.g., *Practical management of rabies and the 1982 outbreak in Zorzor District, Liberia*. *Tropical doctor* % @ 0049-4755, 1985. **15**(2): p. 50-54.
319. Muhamuda, K., et al., *Presence of rabies specific immune complexes in cerebro-spinal fluid can help in ante-mortem diagnosis of human paralytic rabies*. *Journal of Clinical Virology*, 2006. **37**(3): p. 162-167.
320. Gnanadurai, C.W., et al., *Presence of Virus Neutralizing Antibodies in Cerebral Spinal Fluid Correlates with Non-Lethal Rabies in Dogs*. *PLoS Neglected Tropical Diseases*, 2013. **7**(9).
321. Salaun, J.J., et al., *The present state of rabies on the Ivory Coast*. *Medecine Tropicale* % @ 0025-682X, 1973. **33**(6): p. 569-577.
322. McLean, R.G., et al., *Prevalence of selected zoonotic diseases in vertebrates from Haiti, 1972*. *Journal of wildlife diseases*, 1979. **15**(2): p. 327-330.
323. Mailles, A., et al., *Rabid dog illegally imported to France from Morocco, August 2011*. *Eurosurveillance* % @ 1025-496X 1560-7917, 2011. **16**(33).
324. Kat, P.W., et al., *Rabies among African wild dogs (Lycaon pictus) in the Masai Mara, Kenya*. *Journal of veterinary diagnostic investigation : official publication of the American Association of Veterinary Laboratory Diagnosticians, Inc* % @ 1040-6387, 1996. **8**(4): p. 420-426.
325. Kasem, S., et al., *Rabies among animals in Saudi Arabia*. *Journal of Infection and Public Health* % @ 1876-035X 1876-0341, 2019. **12**(3): p. 445-447.
326. Kat, P.W., et al., *Rabies and African wild dogs in Kenya*. *Proceedings of the Royal Society B: Biological Sciences* % @ 1471-2970 0962-8452, 1995. **262**(1364): p. 229-233.
327. Mbilo, C., et al., *Rabies awareness and dog ownership among rural northern and southern Chadian communities-Analysis of a community-based, cross-sectional household survey*. *Acta tropica* % @ 1873-6254, 2017. **175**: p. 100-111.
328. LeRoux, K., et al., *Rabies control in Kwazulu-Natal, South Africa*. *Bulletin of the World Health Organization* % @ 1564-0604 0042-9686, 2018. **96**(5): p. 360-365.
329. Selly-Essis, M., et al., *The rabies endemic in the Ivory Coast as seen through the work of the Pasteur Institute of the Ivory Coast*. *Archives de l'Institut Pasteur de Tunis* % @ 0020-2509, 1982. **59**(1): p. 33-40.
330. Hampson, K., et al., *Rabies exposures, post-exposure prophylaxis and deaths in a region of endemic canine rabies*. *PLoS Neglected Tropical Diseases*, 2008. **2**(11).
331. Mani, R.S., et al., *Rabies following mongoose bite*. *Indian Journal of Medical Microbiology*, 2016. **34**(2): p. 256-257.
332. Chambron, J., et al., *Rabies in a captive wart-hog in Senegal*. *Revue d'élevage et de médecine vétérinaire des pays tropicaux* % @ 0035-1865, 1967. **20**(2): p. 343-344.
333. Enurah, L.U., et al., *Rabies in a civet cat (Civettictis civetta) in the Jos Zoo, Nigeria*. *The British veterinary journal* % @ 0007-1935, 1988. **144**(5): p. 515-516.
334. Hercules, Y., et al., *Rabies in a Dog Imported from Egypt - Connecticut, 2017*. *MMWR. Morbidity and mortality weekly report* % @ 1545-861X, 2018. **67**(50): p. 1388-1391.
335. Oboegbulem, S.I., et al., *Rabies in a Muturu cow in eastern Nigeria*. *The Veterinary record* % @ 0042-4900, 1981. **108**(17): p. 380-381.
336. Ojo, M.O., et al., *Rabies in a Nigerian dwarf goat*. *Bulletin of epizootic diseases of Africa. Bulletin des épizooties en Afrique* % @ 0007-487X, 1967. **15**(4): p. 409-410.
337. Maurice, N.A., et al., *Rabies in a set of eight-week old puppies in Nigeria: The need for review of current dog antirabies vaccination schedule*. *African Journal of Infectious Diseases* % @ 2006-0165, 2018. **12**(2): p. 72-77.

338. Ahmadu, B., et al., *Rabies in a Zambian bat*. The Veterinary record % @ 0042-4900, 1998. **143**(5): p. 148.
339. Hofmeyr, M., et al., *Rabies in African wild dogs (Lycaon pictus) in the Madikwe Game Reserve, South Africa*. Veterinary Record % @ 0042-4900, 2000. **146**(2): p. 50-52.
340. Gascoyne, S.C., et al., *Rabies in African wild dogs (Lycaon pictus) in the Serengeti region, Tanzania*. Journal of wildlife diseases % @ 0090-3558, 1993. **29**(3): p. 396-402.
341. Okolo, M.I.U.h.w.e.c.s.r.s.v., from=export, and L.h.d.d.o.v. id, *Rabies in Anambra State, Nigeria*. The Veterinary record % @ 0042-4900, 1986. **119**(1): p. 18.
342. Owolodun, B.Y.U.h.w.e.c.s.r.s.v., from=export, and id=L, *Rabies in cattle in Northern States-Nigeria*. Bulletin of epizootic diseases of Africa. Bulletin des épizooties en Afrique % @ 0007-487X, 1968. **16**(4): p. 425-427.
343. Bouskraoui, M., et al., *Rabies in children. A review of eleven cases*. Annales de Pédiatrie % @ 0066-2097, 1997. **44**(9): p. 641-643.
