# Supplementary material for: Incidence and seroprevalence of rabies virus in humans, dogs and other animal species in Africa, a systematic review and meta-analysis
Source: PubMed Central journal article supplement — One Health. 2021 Jun 26;13:100285. doi: 10.1016/j.onehlt.2021.100285 (PMC8254041; doi:10.1016/j.onehlt.2021.100285), 2021-06-26
Supplement: mmc11.pdf [file mmc11.pdf]

## Supplementary Table 5. Risk of bias assessment

| Author              | Was the study's target population a close representation of the national population in relation to RABV prevalence? | Was the sampling frame a true or close representation of the target population? | Was some form of random selection used to select the sample, OR was a census undertaken? | Were data collected directly from the subjects (as opposed to a proxy)? | Was an acceptable case definition used in the study? | Was the response rate $\geq 70\%$ or not significantly different in relevant demographic characteristics between responders and non- responders? | Was the RABV detection assay shown to have reliability and validity? | Was the same mode type of sample collected for all subjects? | Was the length of the study period > 1 year? | Were the numerator(s) and denominator(s) for the RABV prevalence appropriate? | Species       | Risk of bias          |
|---------------------|---------------------------------------------------------------------------------------------------------------------|---------------------------------------------------------------------------------|------------------------------------------------------------------------------------------|-------------------------------------------------------------------------|------------------------------------------------------|--------------------------------------------------------------------------------------------------------------------------------------------------|----------------------------------------------------------------------|--------------------------------------------------------------|----------------------------------------------|-------------------------------------------------------------------------------|---------------|-----------------------|
| Aghomo, 1990        | No                                                                                                                  | Yes                                                                             | Yes                                                                                      | Not applicable (for animals)                                            | No                                                   | No                                                                                                                                               | Yes                                                                  | Yes                                                          | Unclear                                      | No                                                                            | Other animals | Moderate risk of bias |
| Aghomo, 1990        | No                                                                                                                  | Yes                                                                             | Yes                                                                                      | Not applicable (for animals)                                            | No                                                   | No                                                                                                                                               | Yes                                                                  | Yes                                                          | Unclear                                      | No                                                                            | Other animals | Moderate risk of bias |
| Ajayi, 2006         | No                                                                                                                  | Yes                                                                             | No                                                                                       | Not applicable (for animals)                                            | No                                                   | No                                                                                                                                               | Yes                                                                  | Yes                                                          | Unclear                                      | Yes                                                                           | Dogs          | Moderate risk of bias |
| Alibi, 2014         | No                                                                                                                  | Yes                                                                             | No                                                                                       | Not applicable (for animals)                                            | No                                                   | No                                                                                                                                               | Yes                                                                  | Yes                                                          | Yes                                          | Yes                                                                           | Dogs          | Moderate risk of bias |
| Alexander, 1994     | No                                                                                                                  | Yes                                                                             | No                                                                                       | Not applicable (for animals)                                            | No                                                   | No                                                                                                                                               | Yes                                                                  | Yes                                                          | No                                           | Yes                                                                           | Other animals | Moderate risk of bias |
| Alexander, 1993     | No                                                                                                                  | Yes                                                                             | No                                                                                       | Not applicable (for animals)                                            | No                                                   | No                                                                                                                                               | Yes                                                                  | Yes                                                          | Yes                                          | Yes                                                                           | Dogs          | Moderate risk of bias |
| Alexander, 1993     | No                                                                                                                  | Yes                                                                             | No                                                                                       | Not applicable (for animals)                                            | No                                                   | No                                                                                                                                               | Yes                                                                  | Yes                                                          | Yes                                          | Yes                                                                           | Dogs          | Moderate risk of bias |
| Alexander, 1993     | No                                                                                                                  | Yes                                                                             | No                                                                                       | Not applicable (for animals)                                            | No                                                   | No                                                                                                                                               | Yes                                                                  | Yes                                                          | Yes                                          | Yes                                                                           | Dogs          | Moderate risk of bias |
| Alexander, 1993     | No                                                                                                                  | Yes                                                                             | No                                                                                       | Not applicable (for animals)                                            | No                                                   | No                                                                                                                                               | Yes                                                                  | Yes                                                          | Yes                                          | Yes                                                                           | Other animals | Moderate risk of bias |
| Alexander, 1993     | No                                                                                                                  | Yes                                                                             | No                                                                                       | Not applicable (for animals)                                            | No                                                   | No                                                                                                                                               | Yes                                                                  | Yes                                                          | Yes                                          | Yes                                                                           | Other animals | Moderate risk of bias |
| Alexander, 1993     | No                                                                                                                  | Yes                                                                             | No                                                                                       | Not applicable (for animals)                                            | No                                                   | No                                                                                                                                               | Yes                                                                  | Yes                                                          | Yes                                          | Yes                                                                           | Other animals | Moderate risk of bias |
| Ali, 2010           | No                                                                                                                  | Yes                                                                             | No                                                                                       | Not applicable (for animals)                                            | No                                                   | No                                                                                                                                               | Yes                                                                  | Yes                                                          | Yes                                          | Yes                                                                           | Dogs          | Moderate risk of bias |
| Ali, 2010           | No                                                                                                                  | Yes                                                                             | No                                                                                       | Not applicable (for animals)                                            | No                                                   | No                                                                                                                                               | Yes                                                                  | Yes                                                          | Yes                                          | Yes                                                                           | Dogs          | Moderate risk of bias |
| Ali, 2010           | No                                                                                                                  | Yes                                                                             | No                                                                                       | Not applicable (for animals)                                            | No                                                   | No                                                                                                                                               | Yes                                                                  | Yes                                                          | Yes                                          | Yes                                                                           | Other animals | Moderate risk of bias |
| Ali, 2010           | No                                                                                                                  | Yes                                                                             | No                                                                                       | Not applicable (for animals)                                            | No                                                   | No                                                                                                                                               | Yes                                                                  | Yes                                                          | Yes                                          | Yes                                                                           | Other animals | Moderate risk of bias |
| Ali, 2010           | No                                                                                                                  | Yes                                                                             | No                                                                                       | Not applicable (for animals)                                            | No                                                   | No                                                                                                                                               | Yes                                                                  | Yes                                                          | Yes                                          | Yes                                                                           | Other animals | Moderate risk of bias |
| Ali, 2010           | No                                                                                                                  | Yes                                                                             | No                                                                                       | Not applicable (for animals)                                            | No                                                   | No                                                                                                                                               | Yes                                                                  | Yes                                                          | Yes                                          | Yes                                                                           | Other animals | Moderate risk of bias |
| Ali, 2010           | No                                                                                                                  | Yes                                                                             | No                                                                                       | Not applicable (for animals)                                            | No                                                   | No                                                                                                                                               | Yes                                                                  | Yes                                                          | Yes                                          | Yes                                                                           | Other animals | Moderate risk of bias |
| Ali, 2010           | No                                                                                                                  | Yes                                                                             | No                                                                                       | Not applicable (for animals)                                            | No                                                   | No                                                                                                                                               | Yes                                                                  | Yes                                                          | Yes                                          | Yes                                                                           | Other animals | Moderate risk of bias |
| Aworh, 2011         | No                                                                                                                  | Yes                                                                             | No                                                                                       | Not applicable (for animals)                                            | No                                                   | No                                                                                                                                               | Yes                                                                  | Yes                                                          | Yes                                          | Yes                                                                           | Dogs          | Moderate risk of bias |
| Baba, 2004          | No                                                                                                                  | Yes                                                                             | Yes                                                                                      | Not applicable (for animals)                                            | No                                                   | No                                                                                                                                               | Yes                                                                  | Yes                                                          | Yes                                          | Yes                                                                           | Other animals | Moderate risk of bias |
| Badiali, 1966       | No                                                                                                                  | Yes                                                                             | No                                                                                       | Not applicable (for animals)                                            | No                                                   | No                                                                                                                                               | Yes                                                                  | Yes                                                          | Yes                                          | Yes                                                                           | Other animals | Moderate risk of bias |
| Badiali, 1966       | No                                                                                                                  | Yes                                                                             | No                                                                                       | Not applicable (for animals)                                            | No                                                   | No                                                                                                                                               | Yes                                                                  | Yes                                                          | Yes                                          | Yes                                                                           | Other animals | Moderate risk of bias |
| Badiali, 1966       | No                                                                                                                  | Yes                                                                             | No                                                                                       | Not applicable (for animals)                                            | No                                                   | No                                                                                                                                               | Yes                                                                  | Yes                                                          | Yes                                          | Yes                                                                           | Other animals | Moderate risk of bias |
| Berentsen, 2013     | No                                                                                                                  | Yes                                                                             | No                                                                                       | Not applicable (for animals)                                            | No                                                   | No                                                                                                                                               | Yes                                                                  | Yes                                                          | Yes                                          | Yes                                                                           | Dogs          | Moderate risk of bias |
| Berentsen, 2013     | No                                                                                                                  | Yes                                                                             | No                                                                                       | Not applicable (for animals)                                            | No                                                   | No                                                                                                                                               | Yes                                                                  | Yes                                                          | Yes                                          | Yes                                                                           | Other animals | Moderate risk of bias |
| Berentsen, 2013     | No                                                                                                                  | Yes                                                                             | No                                                                                       | Not applicable (for animals)                                            | No                                                   | No                                                                                                                                               | Yes                                                                  | Yes                                                          | Yes                                          | Yes                                                                           | Other animals | Moderate risk of bias |
| Cleveland, 1999     | No                                                                                                                  | Yes                                                                             | Yes                                                                                      | Not applicable (for animals)                                            | No                                                   | No                                                                                                                                               | Yes                                                                  | Yes                                                          | No                                           | No                                                                            | Dogs          | Moderate risk of bias |
| Cleveland, 1999     | No                                                                                                                  | Yes                                                                             | Yes                                                                                      | Not applicable (for animals)                                            | No                                                   | No                                                                                                                                               | Yes                                                                  | Yes                                                          | No                                           | No                                                                            | Dogs          | Moderate risk of bias |
| Cleveland, 2002     | No                                                                                                                  | Yes                                                                             | Yes                                                                                      | Not applicable (for animals)                                            | Yes                                                  | No                                                                                                                                               | Yes                                                                  | Yes                                                          | Yes                                          | No                                                                            | Dogs          | Moderate risk of bias |
| Coetzer, 2017       | No                                                                                                                  | Yes                                                                             | Yes                                                                                      | Not applicable (for animals)                                            | No                                                   | No                                                                                                                                               | Yes                                                                  | Yes                                                          | Unclear                                      | No                                                                            | Other animals | Moderate risk of bias |
| Coetzer, 2017       | No                                                                                                                  | Yes                                                                             | Yes                                                                                      | Not applicable (for animals)                                            | No                                                   | No                                                                                                                                               | Yes                                                                  | Yes                                                          | Unclear                                      | No                                                                            | Other animals | Moderate risk of bias |
| Coetzer, 2019       | Yes                                                                                                                 | Yes                                                                             | Yes                                                                                      | Not applicable (for animals)                                            | No                                                   | No                                                                                                                                               | Yes                                                                  | Yes                                                          | Yes                                          | No                                                                            | Dogs          | Moderate risk of bias |
| Coetzer, 2019       | Yes                                                                                                                 | Yes                                                                             | Yes                                                                                      | Not applicable (for animals)                                            | No                                                   | No                                                                                                                                               | Yes                                                                  | Yes                                                          | Yes                                          | No                                                                            | Other animals | Moderate risk of bias |
| Coetzer, 2019       | Yes                                                                                                                 | Yes                                                                             | Yes                                                                                      | Not applicable (for animals)                                            | No                                                   | No                                                                                                                                               | Yes                                                                  | Yes                                                          | Yes                                          | No                                                                            | Other animals | Moderate risk of bias |
| Coetzer, 2019       | Yes                                                                                                                 | Yes                                                                             | Yes                                                                                      | Not applicable (for animals)                                            | No                                                   | No                                                                                                                                               | Yes                                                                  | Yes                                                          | Yes                                          | No                                                                            | Other animals | Moderate risk of bias |
| Creel, 1997         | No                                                                                                                  | Yes                                                                             | No                                                                                       | Not applicable (for animals)                                            | No                                                   | No                                                                                                                                               | Yes                                                                  | Yes                                                          | Yes                                          | Yes                                                                           | Dogs          | Moderate risk of bias |
| Daniel, 2014        | No                                                                                                                  | Yes                                                                             | Yes                                                                                      | Not applicable (for animals)                                            | No                                                   | No                                                                                                                                               | Yes                                                                  | Yes                                                          | Unclear                                      | Yes                                                                           | Dogs          | Moderate risk of bias |
| Daniel, 2014        | No                                                                                                                  | Yes                                                                             | Yes                                                                                      | Not applicable (for animals)                                            | No                                                   | No                                                                                                                                               | Yes                                                                  | Yes                                                          | Unclear                                      | Yes                                                                           | Dogs          | Moderate risk of bias |
| Daniel, 2014        | No                                                                                                                  | Yes                                                                             | Yes                                                                                      | Not applicable (for animals)                                            | No                                                   | No                                                                                                                                               | Yes                                                                  | Yes                                                          | Unclear                                      | Yes                                                                           | Dogs          | Moderate risk of bias |
| Dao, 2006           | No                                                                                                                  | Yes                                                                             | Yes                                                                                      | Not applicable (for animals)                                            | No                                                   | No                                                                                                                                               | Yes                                                                  | Yes                                                          | Yes                                          | Yes                                                                           | Dogs          | Moderate risk of bias |
| De Benedictis, 2010 | No                                                                                                                  | Yes                                                                             | Yes                                                                                      | Not applicable (for animals)                                            | No                                                   | No                                                                                                                                               | Yes                                                                  | Yes                                                          | Yes                                          | Yes                                                                           | Other animals | Moderate risk of bias |
| Deressa, 2010       | No                                                                                                                  | Yes                                                                             | Yes                                                                                      | Not applicable (for animals)                                            | No                                                   | No                                                                                                                                               | Yes                                                                  | Yes                                                          | Yes                                          | No                                                                            | Dogs          | Moderate risk of bias |
| Deressa, 2010       | No                                                                                                                  | Yes                                                                             | Yes                                                                                      | Not applicable (for animals)                                            | No                                                   | No                                                                                                                                               | Yes                                                                  | Yes                                                          | Yes                                          | No                                                                            | Other animals | Moderate risk of bias |
| Deressa, 2010       | No                                                                                                                  | Yes                                                                             | Yes                                                                                      | Not applicable (for animals)                                            | No                                                   | No                                                                                                                                               | Yes                                                                  | Yes                                                          | Yes                                          | No                                                                            | Other animals | Moderate risk of bias |
| Dzikwi, 2010        | No                                                                                                                  | Yes                                                                             | No                                                                                       | Not applicable (for animals)                                            | No                                                   | No                                                                                                                                               | Yes                                                                  | Yes                                                          | No                                           | Yes                                                                           | Other animals | Moderate risk of bias |
| Dzikwi, 2010        | No                                                                                                                  | Yes                                                                             | No                                                                                       | Not applicable (for animals)                                            | No                                                   | No                                                                                                                                               | Yes                                                                  | Yes                                                          | No                                           | Yes                                                                           | Other animals | Moderate risk of bias |
| Edward, 2014        | No                                                                                                                  | Yes                                                                             | Yes                                                                                      | Not applicable (for animals)                                            | No                                                   | No                                                                                                                                               | Yes                                                                  | Yes                                                          | Yes                                          | No                                                                            | Dogs          | Moderate risk of bias |
| Ehimiyein, 2014     | No                                                                                                                  | Yes                                                                             | No                                                                                       | Not applicable (for animals)                                            | No                                                   | No                                                                                                                                               | Yes                                                                  | Yes                                                          | Unclear                                      | No                                                                            | Dogs          | High risk of bias     |
| Ehimiyein, 2010     | No                                                                                                                  | Yes                                                                             | No                                                                                       | Not applicable (for animals)                                            | No                                                   | No                                                                                                                                               | Yes                                                                  | Yes                                                          | Unclear                                      | Yes                                                                           | Dogs          | Moderate risk of bias |
| Ehizibolo, 2009     | No                                                                                                                  | Yes                                                                             | No                                                                                       | Not applicable (for animals)                                            | No                                                   | No                                                                                                                                               | Yes                                                                  | Yes                                                          | Yes                                          | Yes                                                                           | Dogs          | Moderate risk of bias |
| Eze, 2018           | No                                                                                                                  | Yes                                                                             | No                                                                                       | Not applicable (for animals)                                            | Yes                                                  | No                                                                                                                                               | Yes                                                                  | Yes                                                          | No                                           | Yes                                                                           | Dogs          | Moderate risk of bias |
| Eze, 2018           | No                                                                                                                  | Yes                                                                             | No                                                                                       | Not applicable (for animals)                                            | Yes                                                  | No                                                                                                                                               | Yes                                                                  | Yes                                                          | No                                           | Yes                                                                           | Dogs          | Moderate risk of bias |
| Ezeokoli, 1987      | No                                                                                                                  | Yes                                                                             | No                                                                                       | Not applicable (for animals)                                            | No                                                   | No                                                                                                                                               | Yes                                                                  | Yes                                                          | Yes                                          | Yes                                                                           | Dogs          | Moderate risk of bias |
| Garba, 2008         | No                                                                                                                  | Yes                                                                             | No                                                                                       | Not applicable (for animals)                                            | No                                                   | No                                                                                                                                               | Yes                                                                  | Yes                                                          | Unclear                                      | Yes                                                                           | Dogs          | Moderate risk of bias |

| Author                | Was the study's target population a close representation of the national population in relation to RABV prevalence? | Was the sampling frame a true or close representation of the target population? | Was some form of random selection used to select the sample, OR was a census undertaken? | Were data collected directly from the subjects (as opposed to a proxy)? | Was an acceptable case definition used in the study? | Was the response rate $\geq 70\%$ or not significant different in relevant demographic characteristics between responders and non- responders? | Was the RABV detection assay shown to have reliability and validity? | Was the same mode type of sample collected for all subjects? | Was the length of the study period > 1 year? | Were the numerator(s) and denominator(s) for the RABV prevalence appropriate? | Species       | Risk of bias          |
|-----------------------|---------------------------------------------------------------------------------------------------------------------|---------------------------------------------------------------------------------|------------------------------------------------------------------------------------------|-------------------------------------------------------------------------|------------------------------------------------------|------------------------------------------------------------------------------------------------------------------------------------------------|----------------------------------------------------------------------|--------------------------------------------------------------|----------------------------------------------|-------------------------------------------------------------------------------|---------------|-----------------------|
| Grover, 2018          | No                                                                                                                  | Yes                                                                             | No                                                                                       | Not applicable (for animals)                                            | No                                                   | No                                                                                                                                             | Yes                                                                  | Yes                                                          | Yes                                          | Yes                                                                           | Dogs          | Moderate risk of bias |
| Grover, 2018          | No                                                                                                                  | Yes                                                                             | No                                                                                       | Not applicable (for animals)                                            | No                                                   | No                                                                                                                                             | Yes                                                                  | Yes                                                          | Yes                                          | Yes                                                                           | Other animals | Moderate risk of bias |
| Hambolu, 2014         | No                                                                                                                  | Yes                                                                             | Yes                                                                                      | Not applicable (for animals)                                            | No                                                   | No                                                                                                                                             | Yes                                                                  | Yes                                                          | Yes                                          | Yes                                                                           | Dogs          | Moderate risk of bias |
| Hikufe, 2019          | No                                                                                                                  | Yes                                                                             | No                                                                                       | Not applicable (for animals)                                            | No                                                   | No                                                                                                                                             | Yes                                                                  | Yes                                                          | Yes                                          | Yes                                                                           | Dogs          | Moderate risk of bias |
| Hikufe, 2019          | No                                                                                                                  | Yes                                                                             | No                                                                                       | Not applicable (for animals)                                            | No                                                   | No                                                                                                                                             | Yes                                                                  | Yes                                                          | Yes                                          | Yes                                                                           | Other animals | Moderate risk of bias |
| Hikufe, 2019          | No                                                                                                                  | Yes                                                                             | No                                                                                       | Not applicable (for animals)                                            | No                                                   | No                                                                                                                                             | Yes                                                                  | Yes                                                          | Yes                                          | Yes                                                                           | Other animals | Moderate risk of bias |
| Hikufe, 2019          | No                                                                                                                  | Yes                                                                             | No                                                                                       | Not applicable (for animals)                                            | No                                                   | No                                                                                                                                             | Yes                                                                  | Yes                                                          | Yes                                          | Yes                                                                           | Other animals | Moderate risk of bias |
| Hikufe, 2019          | No                                                                                                                  | Yes                                                                             | No                                                                                       | Not applicable (for animals)                                            | No                                                   | No                                                                                                                                             | Yes                                                                  | Yes                                                          | Yes                                          | Yes                                                                           | Other animals | Moderate risk of bias |
| Hikufe, 2019          | No                                                                                                                  | Yes                                                                             | No                                                                                       | Not applicable (for animals)                                            | No                                                   | No                                                                                                                                             | Yes                                                                  | Yes                                                          | Yes                                          | Yes                                                                           | Other animals | Moderate risk of bias |
| Hikufe, 2019          | No                                                                                                                  | Yes                                                                             | No                                                                                       | Not applicable (for animals)                                            | No                                                   | No                                                                                                                                             | Yes                                                                  | Yes                                                          | Yes                                          | Yes                                                                           | Other animals | Moderate risk of bias |
| Hikufe, 2019          | No                                                                                                                  | Yes                                                                             | No                                                                                       | Not applicable (for animals)                                            | No                                                   | No                                                                                                                                             | Yes                                                                  | Yes                                                          | Yes                                          | Yes                                                                           | Other animals | Moderate risk of bias |
| Hikufe, 2019          | No                                                                                                                  | Yes                                                                             | No                                                                                       | Not applicable (for animals)                                            | No                                                   | No                                                                                                                                             | Yes                                                                  | Yes                                                          | Yes                                          | Yes                                                                           | Other animals | Moderate risk of bias |
| Hikufe, 2019          | No                                                                                                                  | Yes                                                                             | No                                                                                       | Not applicable (for animals)                                            | No                                                   | No                                                                                                                                             | Yes                                                                  | Yes                                                          | Yes                                          | Yes                                                                           | Other animals | Moderate risk of bias |
| Hikufe, 2019          | No                                                                                                                  | Yes                                                                             | No                                                                                       | Not applicable (for animals)                                            | No                                                   | No                                                                                                                                             | Yes                                                                  | Yes                                                          | Yes                                          | Yes                                                                           | Other animals | Moderate risk of bias |
| Isek, 2013            | No                                                                                                                  | Yes                                                                             | No                                                                                       | Not applicable (for animals)                                            | No                                                   | No                                                                                                                                             | Yes                                                                  | Yes                                                          | No                                           | Yes                                                                           | Dogs          | Moderate risk of bias |
| Kalemba, 2017         | No                                                                                                                  | Yes                                                                             | No                                                                                       | Not applicable (for animals)                                            | No                                                   | No                                                                                                                                             | Yes                                                                  | Yes                                                          | Yes                                          | Yes                                                                           | Other animals | Moderate risk of bias |
| Kayali, 2003          | No                                                                                                                  | Yes                                                                             | No                                                                                       | Not applicable (for animals)                                            | No                                                   | No                                                                                                                                             | Yes                                                                  | Yes                                                          | Yes                                          | Yes                                                                           | Dogs          | Moderate risk of bias |
| Kia, 2018             | No                                                                                                                  | Yes                                                                             | No                                                                                       | Not applicable (for animals)                                            | No                                                   | No                                                                                                                                             | Yes                                                                  | Yes                                                          | Yes                                          | Yes                                                                           | Dogs          | Moderate risk of bias |
| Kitala, 2000          | No                                                                                                                  | Yes                                                                             | Yes                                                                                      | Not applicable (for animals)                                            | No                                                   | No                                                                                                                                             | Yes                                                                  | Yes                                                          | Yes                                          | Yes                                                                           | Dogs          | Moderate risk of bias |
| Kitala, 2000          | No                                                                                                                  | Yes                                                                             | Yes                                                                                      | Not applicable (for animals)                                            | No                                                   | No                                                                                                                                             | Yes                                                                  | Yes                                                          | Yes                                          | Yes                                                                           | Other animals | Moderate risk of bias |
| Laurenson, 1997       | No                                                                                                                  | Yes                                                                             | No                                                                                       | Not applicable (for animals)                                            | No                                                   | No                                                                                                                                             | Yes                                                                  | Yes                                                          | Yes                                          | Yes                                                                           | Dogs          | Moderate risk of bias |
| Lechenne, 2017        | No                                                                                                                  | Yes                                                                             | No                                                                                       | Not applicable (for animals)                                            | No                                                   | No                                                                                                                                             | Yes                                                                  | Yes                                                          | Yes                                          | Yes                                                                           | Dogs          | Moderate risk of bias |
| Mebatsion, 1992       | No                                                                                                                  | Yes                                                                             | No                                                                                       | Not applicable (for animals)                                            | No                                                   | No                                                                                                                                             | Yes                                                                  | Yes                                                          | Yes                                          | Yes                                                                           | Other animals | Moderate risk of bias |
| Mebatsion, 1992       | No                                                                                                                  | Yes                                                                             | No                                                                                       | Not applicable (for animals)                                            | No                                                   | No                                                                                                                                             | Yes                                                                  | Yes                                                          | Unclear                                      | Yes                                                                           | Dogs          | Moderate risk of bias |
| Mebatsion, 1992       | No                                                                                                                  | Yes                                                                             | No                                                                                       | Not applicable (for animals)                                            | No                                                   | No                                                                                                                                             | Yes                                                                  | Yes                                                          | Unclear                                      | Yes                                                                           | Dogs          | Moderate risk of bias |
| Millán, 2013          | No                                                                                                                  | Yes                                                                             | No                                                                                       | Not applicable (for animals)                                            | No                                                   | No                                                                                                                                             | Yes                                                                  | Yes                                                          | Yes                                          | Yes                                                                           | Dogs          | Moderate risk of bias |
| Mshelbwala, 2013      | No                                                                                                                  | Yes                                                                             | Yes                                                                                      | Not applicable (for animals)                                            | No                                                   | No                                                                                                                                             | Yes                                                                  | Yes                                                          | Unclear                                      | Yes                                                                           | Dogs          | Moderate risk of bias |
| Mtui-Malamsha, 2019   | No                                                                                                                  | Yes                                                                             | Yes                                                                                      | Not applicable (for animals)                                            | No                                                   | Yes                                                                                                                                            | Yes                                                                  | Yes                                                          | No                                           | Yes                                                                           | Dogs          | Moderate risk of bias |
| Muhammad-Bashir, 2016 | No                                                                                                                  | Yes                                                                             | No                                                                                       | Not applicable (for animals)                                            | No                                                   | No                                                                                                                                             | Yes                                                                  | Yes                                                          | Yes                                          | Yes                                                                           | Dogs          | Moderate risk of bias |
| Muhammad-Bashir, 2016 | No                                                                                                                  | Yes                                                                             | No                                                                                       | Not applicable (for animals)                                            | No                                                   | No                                                                                                                                             | Yes                                                                  | Yes                                                          | Yes                                          | Yes                                                                           | Other animals | Moderate risk of bias |
| Munang'andu, 2011     | No                                                                                                                  | Yes                                                                             | No                                                                                       | Not applicable (for animals)                                            | No                                                   | No                                                                                                                                             | Yes                                                                  | Yes                                                          | Yes                                          | Yes                                                                           | Dogs          | Moderate risk of bias |
| Munang'andu, 2011     | No                                                                                                                  | Yes                                                                             | No                                                                                       | Yes                                                                     | No                                                   | No                                                                                                                                             | Yes                                                                  | Yes                                                          | Yes                                          | Yes                                                                           | Humans        | Moderate risk of bias |
| Munang'andu, 2011     | No                                                                                                                  | Yes                                                                             | No                                                                                       | Not applicable (for animals)                                            | No                                                   | No                                                                                                                                             | Yes                                                                  | Yes                                                          | Yes                                          | Yes                                                                           | Other animals | Moderate risk of bias |
| Munang'andu, 2011     | No                                                                                                                  | Yes                                                                             | No                                                                                       | Not applicable (for animals)                                            | No                                                   | No                                                                                                                                             | Yes                                                                  | Yes                                                          | Yes                                          | Yes                                                                           | Other animals | Moderate risk of bias |
| Munang'andu, 2011     | No                                                                                                                  | Yes                                                                             | No                                                                                       | Not applicable (for animals)                                            | No                                                   | No                                                                                                                                             | Yes                                                                  | Yes                                                          | Yes                                          | Yes                                                                           | Other animals | Moderate risk of bias |
| Munang'andu, 2011     | No                                                                                                                  | Yes                                                                             | No                                                                                       | Not applicable (for animals)                                            | No                                                   | No                                                                                                                                             | Yes                                                                  | Yes                                                          | Yes                                          | Yes                                                                           | Other animals | Moderate risk of bias |
| Munang'andu, 2011     | No                                                                                                                  | Yes                                                                             | No                                                                                       | Not applicable (for animals)                                            | No                                                   | No                                                                                                                                             | Yes                                                                  | Yes                                                          | Yes                                          | Yes                                                                           | Other animals | Moderate risk of bias |
| Nakouné, 2012         | No                                                                                                                  | Yes                                                                             | No                                                                                       | Not applicable (for animals)                                            | No                                                   | No                                                                                                                                             | Yes                                                                  | Yes                                                          | Yes                                          | Yes                                                                           | Dogs          | Moderate risk of bias |
| Nimzing, 2003         | No                                                                                                                  | Yes                                                                             | No                                                                                       | Not applicable (for animals)                                            | No                                                   | No                                                                                                                                             | Yes                                                                  | Yes                                                          | Unclear                                      | Yes                                                                           | Dogs          | Moderate risk of bias |
| Odeh, 2014            | No                                                                                                                  | Yes                                                                             | No                                                                                       | Not applicable (for animals)                                            | No                                                   | No                                                                                                                                             | Yes                                                                  | Yes                                                          | No                                           | Yes                                                                           | Dogs          | Moderate risk of bias |
| Oelofsen, 1993        | No                                                                                                                  | Yes                                                                             | No                                                                                       | Not applicable (for animals)                                            | No                                                   | No                                                                                                                                             | Yes                                                                  | Yes                                                          | Unclear                                      | Yes                                                                           | Other animals | Moderate risk of bias |
| Oelofsen, 1993        | No                                                                                                                  | Yes                                                                             | No                                                                                       | Not applicable (for animals)                                            | No                                                   | No                                                                                                                                             | Yes                                                                  | Yes                                                          | Unclear                                      | Yes                                                                           | Other animals | Moderate risk of bias |
| Ogunkoya, 1990        | No                                                                                                                  | Yes                                                                             | No                                                                                       | Not applicable (for animals)                                            | No                                                   | No                                                                                                                                             | Yes                                                                  | Yes                                                          | Unclear                                      | Yes                                                                           | Dogs          | Moderate risk of bias |
| Ogunkoya, 1990        | No                                                                                                                  | Yes                                                                             | No                                                                                       | Not applicable (for animals)                                            | No                                                   | No                                                                                                                                             | Yes                                                                  | Yes                                                          | Unclear                                      | Yes                                                                           | Dogs          | Moderate risk of bias |
| Ogunkoya, 1990        | No                                                                                                                  | Yes                                                                             | No                                                                                       | Yes                                                                     | No                                                   | No                                                                                                                                             | Yes                                                                  | Yes                                                          | Unclear                                      | Yes                                                                           | Humans        | Moderate risk of bias |
| Okoh, 2018            | No                                                                                                                  | Yes                                                                             | No                                                                                       | Not applicable (for animals)                                            | No                                                   | No                                                                                                                                             | Yes                                                                  | Yes                                                          | Unclear                                      | Yes                                                                           | Dogs          | Moderate risk of bias |
| Okoh, 1986            | No                                                                                                                  | Yes                                                                             | No                                                                                       | Not applicable (for animals)                                            | No                                                   | No                                                                                                                                             | Yes                                                                  | Yes                                                          | Yes                                          | Yes                                                                           | Other animals | Moderate risk of bias |
| Olarinmoye, 2019      | No                                                                                                                  | Yes                                                                             | No                                                                                       | Not applicable (for animals)                                            | No                                                   | No                                                                                                                                             | Yes                                                                  | Yes                                                          | Yes                                          | Yes                                                                           | Dogs          | Moderate risk of bias |
| Oluqas, 2011          | No                                                                                                                  | Yes                                                                             | Yes                                                                                      | Not applicable (for animals)                                            | No                                                   | No                                                                                                                                             | Yes                                                                  | Yes                                                          | No                                           | Yes                                                                           | Dogs          | Moderate risk of bias |
| Oluqas, 2011          | No                                                                                                                  | Yes                                                                             | Yes                                                                                      | Not applicable (for animals)                                            | No                                                   | No                                                                                                                                             | Yes                                                                  | Yes                                                          | No                                           | Yes                                                                           | Dogs          | Moderate risk of bias |
| Oluqasa, 2010         | No                                                                                                                  | Yes                                                                             | Yes                                                                                      | Yes                                                                     | No                                                   | No                                                                                                                                             | Yes                                                                  | Yes                                                          | No                                           | Yes                                                                           | Humans        | Moderate risk of bias |
| Oluwayelu, 2014       | No                                                                                                                  | Yes                                                                             | No                                                                                       | Not applicable (for animals)                                            | No                                                   | No                                                                                                                                             | Yes                                                                  | Yes                                                          | Unclear                                      | Yes                                                                           | Dogs          | Moderate risk of bias |
| Oluwayelu, 2015       | No                                                                                                                  | Yes                                                                             | No                                                                                       | Not applicable (for animals)                                            | No                                                   | No                                                                                                                                             | Yes                                                                  | Yes                                                          | Unclear                                      | Yes                                                                           | Dogs          | Moderate risk of bias |
| Oluwayelu, 2015       | No                                                                                                                  | Yes                                                                             | No                                                                                       | Not applicable (for animals)                                            | No                                                   | No                                                                                                                                             | Yes                                                                  | Yes                                                          | Unclear                                      | Yes                                                                           | Dogs          | Moderate risk of bias |
| Oluwayelu, 2015       | No                                                                                                                  | Yes                                                                             | No                                                                                       | Not applicable (for animals)                                            | No                                                   | No                                                                                                                                             | Yes                                                                  | Yes                                                          | Unclear                                      | Yes                                                                           | Dogs          | Moderate risk of bias |
| Pfukenyi, 2007        | No                                                                                                                  | Yes                                                                             | No                                                                                       | Yes                                                                     | No                                                   | No                                                                                                                                             | Yes                                                                  | Yes                                                          | Yes                                          | Yes                                                                           | Humans        | Moderate risk of bias |

| Author               | Was the study's target population a close representation of the national population in relation to RABV prevalence? | Was the sampling frame a true or close representation of the target population? | Was some form of random selection used to select the sample, OR was a census undertaken? | Were data collected directly from the subjects (as opposed to a proxy)? | Was an acceptable case definition used in the study? | Was the response rate $\geq 70\%$ or not significant different in relevant demographic characteristics between responders and non- responders? | Was the RABV detection assay shown to have reliability and validity? | Was the same mode type of sample collected for all subjects? | Was the length of the study period > 1 year? | Were the numerator(s) and denominator(s) for the RABV prevalence appropriate? | Species       | Risk of bias          |
|----------------------|---------------------------------------------------------------------------------------------------------------------|---------------------------------------------------------------------------------|------------------------------------------------------------------------------------------|-------------------------------------------------------------------------|------------------------------------------------------|------------------------------------------------------------------------------------------------------------------------------------------------|----------------------------------------------------------------------|--------------------------------------------------------------|----------------------------------------------|-------------------------------------------------------------------------------|---------------|-----------------------|
| Punguwire, 2017      | No                                                                                                                  | Yes                                                                             | No                                                                                       | Not applicable (for animals)                                            | Yes                                                  | No                                                                                                                                             | Yes                                                                  | Yes                                                          | Yes                                          | Yes                                                                           | Dogs          | Moderate risk of bias |
| Randall, 2004        | No                                                                                                                  | Yes                                                                             | No                                                                                       | Not applicable (for animals)                                            | No                                                   | No                                                                                                                                             | Yes                                                                  | Yes                                                          | Yes                                          | Yes                                                                           | Other animals | Moderate risk of bias |
| Reynes, 2011         | No                                                                                                                  | Yes                                                                             | No                                                                                       | Not applicable (for animals)                                            | No                                                   | No                                                                                                                                             | Yes                                                                  | Yes                                                          | Yes                                          | Yes                                                                           | Dogs          | Moderate risk of bias |
| Reynes, 2011         | No                                                                                                                  | Yes                                                                             | No                                                                                       | Yes                                                                     | No                                                   | No                                                                                                                                             | Yes                                                                  | Yes                                                          | Yes                                          | Yes                                                                           | Humans        | Moderate risk of bias |
| Reynes, 2011         | No                                                                                                                  | Yes                                                                             | No                                                                                       | Not applicable (for animals)                                            | No                                                   | No                                                                                                                                             | Yes                                                                  | Yes                                                          | Yes                                          | Yes                                                                           | Other animals | Moderate risk of bias |
| Reynes, 2011         | No                                                                                                                  | Yes                                                                             | No                                                                                       | Not applicable (for animals)                                            | No                                                   | No                                                                                                                                             | Yes                                                                  | Yes                                                          | Yes                                          | Yes                                                                           | Other animals | Moderate risk of bias |
| Reynes, 2011         | No                                                                                                                  | Yes                                                                             | No                                                                                       | Not applicable (for animals)                                            | No                                                   | No                                                                                                                                             | Yes                                                                  | Yes                                                          | Yes                                          | Yes                                                                           | Other animals | Moderate risk of bias |
| Reynes, 2011         | No                                                                                                                  | Yes                                                                             | No                                                                                       | Not applicable (for animals)                                            | No                                                   | No                                                                                                                                             | Yes                                                                  | Yes                                                          | Yes                                          | Yes                                                                           | Other animals | Moderate risk of bias |
| Reynes, 2011         | No                                                                                                                  | Yes                                                                             | No                                                                                       | Not applicable (for animals)                                            | No                                                   | No                                                                                                                                             | Yes                                                                  | Yes                                                          | Yes                                          | Yes                                                                           | Other animals | Moderate risk of bias |
| Reynes, 2011         | No                                                                                                                  | Yes                                                                             | No                                                                                       | Not applicable (for animals)                                            | No                                                   | No                                                                                                                                             | Yes                                                                  | Yes                                                          | Yes                                          | Yes                                                                           | Other animals | Moderate risk of bias |
| Sabeta, 2013         | No                                                                                                                  | Yes                                                                             | No                                                                                       | Not applicable (for animals)                                            | No                                                   | No                                                                                                                                             | Yes                                                                  | Yes                                                          | Yes                                          | Yes                                                                           | Dogs          | Moderate risk of bias |
| Sabeta, 2013         | No                                                                                                                  | Yes                                                                             | No                                                                                       | Not applicable (for animals)                                            | No                                                   | No                                                                                                                                             | Yes                                                                  | Yes                                                          | Yes                                          | Yes                                                                           | Other animals | Moderate risk of bias |
| Sabeta, 2013         | No                                                                                                                  | Yes                                                                             | No                                                                                       | Not applicable (for animals)                                            | No                                                   | No                                                                                                                                             | Yes                                                                  | Yes                                                          | Yes                                          | Yes                                                                           | Other animals | Moderate risk of bias |
| Sabeta, 2013         | No                                                                                                                  | Yes                                                                             | No                                                                                       | Not applicable (for animals)                                            | No                                                   | No                                                                                                                                             | Yes                                                                  | Yes                                                          | Yes                                          | Yes                                                                           | Other animals | Moderate risk of bias |
| Sadeuh-Mba, 2014     | No                                                                                                                  | Yes                                                                             | No                                                                                       | Not applicable (for animals)                                            | No                                                   | No                                                                                                                                             | Yes                                                                  | Yes                                                          | Yes                                          | Yes                                                                           | Dogs          | Moderate risk of bias |
| Sadeuh-Mba, 2017     | No                                                                                                                  | Yes                                                                             | No                                                                                       | Not applicable (for animals)                                            | Yes                                                  | No                                                                                                                                             | Yes                                                                  | Yes                                                          | Yes                                          | Yes                                                                           | Dogs          | Moderate risk of bias |
| Sillero-Zubiri, 1996 | No                                                                                                                  | Yes                                                                             | No                                                                                       | Not applicable (for animals)                                            | No                                                   | No                                                                                                                                             | Yes                                                                  | Yes                                                          | No                                           | Yes                                                                           | Other animals | Moderate risk of bias |
| Sofeu, 2018          | No                                                                                                                  | Yes                                                                             | No                                                                                       | Yes                                                                     | Yes                                                  | No                                                                                                                                             | Yes                                                                  | Yes                                                          | Yes                                          | Yes                                                                           | Humans        | Low risk of bias      |
| Swai, 2010           | No                                                                                                                  | Yes                                                                             | Yes                                                                                      | Not applicable (for animals)                                            | No                                                   | No                                                                                                                                             | Yes                                                                  | Yes                                                          | Yes                                          | Yes                                                                           | Other animals | Moderate risk of bias |
| Swai, 2010           | No                                                                                                                  | Yes                                                                             | Yes                                                                                      | Not applicable (for animals)                                            | No                                                   | No                                                                                                                                             | Yes                                                                  | Yes                                                          | Yes                                          | Yes                                                                           | Other animals | Moderate risk of bias |
| Swai, 2010           | No                                                                                                                  | Yes                                                                             | Yes                                                                                      | Not applicable (for animals)                                            | No                                                   | No                                                                                                                                             | Yes                                                                  | Yes                                                          | Yes                                          | Yes                                                                           | Other animals | Moderate risk of bias |
| Tekki, 2016          | No                                                                                                                  | Yes                                                                             | No                                                                                       | Not applicable (for animals)                                            | No                                                   | No                                                                                                                                             | Yes                                                                  | Yes                                                          | No                                           | Yes                                                                           | Dogs          | Moderate risk of bias |
| Tiembré, 2018        | No                                                                                                                  | Yes                                                                             | No                                                                                       | Yes                                                                     | Yes                                                  | No                                                                                                                                             | Yes                                                                  | Yes                                                          | Yes                                          | Yes                                                                           | Humans        | Low risk of bias      |
| Tricou, 2016         | No                                                                                                                  | Yes                                                                             | No                                                                                       | Not applicable (for animals)                                            | No                                                   | No                                                                                                                                             | Yes                                                                  | Yes                                                          | Yes                                          | Yes                                                                           | Dogs          | Moderate risk of bias |
| Twabela, 2016        | No                                                                                                                  | Yes                                                                             | No                                                                                       | Not applicable (for animals)                                            | Yes                                                  | No                                                                                                                                             | Yes                                                                  | Yes                                                          | Yes                                          | Yes                                                                           | Other animals | Moderate risk of bias |
| Tyem, 2017           | No                                                                                                                  | Yes                                                                             | No                                                                                       | Not applicable (for animals)                                            | No                                                   | No                                                                                                                                             | Yes                                                                  | Yes                                                          | Yes                                          | Yes                                                                           | Other animals | Moderate risk of bias |
| Umoh, 1985           | No                                                                                                                  | Yes                                                                             | No                                                                                       | Not applicable (for animals)                                            | No                                                   | No                                                                                                                                             | Yes                                                                  | Yes                                                          | Unclear                                      | Yes                                                                           | Other animals | Moderate risk of bias |
| Wosu, 1990           | No                                                                                                                  | Yes                                                                             | Yes                                                                                      | Not applicable (for animals)                                            | No                                                   | No                                                                                                                                             | Yes                                                                  | Yes                                                          | Unclear                                      | Yes                                                                           | Dogs          | Moderate risk of bias |

## Reference

1. Odeh, L.E., et al., *Assessment of risk of possible exposure to rabies among processors and consumers of dog meat in Zaria and Kafanchan, Kaduna state, Nigeria*. Global journal of health science %@ 1916-9736, 2014. **6**(1): p. 142-153.
2. Mtui-Malamsha, N., et al., *Ecological and epidemiological findings associated with zoonotic rabies outbreaks and control in Moshi, Tanzania, 2017–2018*. International Journal of Environmental Research and Public Health %@ 1660-4601 1661-7827, 2019. **16**(16).
3. Hikufe, E.H., et al., *Ecology and epidemiology of rabies in humans, domestic animals and wildlife in Namibia, 2011-2017*. PLoS Neglected Tropical Diseases %@ 1935-2735 1935-2727, 2019. **13**(4).
4. Coetzer, A., et al., *Epidemiological aspects of the persistent transmission of rabies during an outbreak (2010 - 2017) in Harare, Zimbabwe*. PloS one %@ 1932-6203, 2019. **14**(1): p. e0210018-e0210018.
5. Ezeokoli, C.D., et al., *Epidemiology of rabies in northern Nigeria*. Transactions of the Royal Society of Tropical Medicine and Hygiene %@ 0035-9203, 1987. **81**(2): p. 268-272.
6. Dzikwi, A.A., et al., *Evidence of Lagos bat virus circulation among Nigerian fruit bats*. Journal of wildlife diseases %@ 1943-3700, 2010. **46**(1): p. 267-271.
7. Kalemba, L.s.N., et al., *Exposure to Lyssaviruses in Bats of the Democratic Republic of the Congo*. Journal of wildlife diseases %@ 1943-3700, 2017. **53**(2): p. 408-410.
8. Okoh, G.s.R., et al., *Heat induced epitope retrieval for rabies virus detection by direct fluorescent antibody test in formalin-fixed dog brain tissues*. Open veterinary journal %@ 2226-4485 2218-6050, 2018. **8**(3): p. 313-317.
9. Tiembré, I., et al., *Human rabies in Côte d'Ivoire 2014-2016: Results following reinforcements to rabies surveillance*. PLoS neglected tropical diseases %@ 1935-2735 1935-2727, 2018. **12**(9): p. e0006649-e0006649.
10. Umoh, J.U., C.D. Ezeokoli, and A.E.U.h.p.n.n.n.g.h.w.n.n.n.g.p.a.P.M.C. Okoh, *Immunofluorescent staining of trypsinized formalin-fixed brain smears for rabies antigen: results compared with those obtained by standard methods for 221 suspect animal cases in Nigeria*. The Journal of hygiene %@ 0022-1724, 1985. **94**(1): p. 129-134.
11. Lechenne, M., et al., *The Importance of a Participatory and Integrated One Health Approach for Rabies Control: The Case of N'Djaména, Chad*. Tropical medicine and infectious disease %@ 2414-6366, 2017. **2**(3): p. 43.
12. Sofeu, C.L., et al., *Improving systematic rabies surveillance in Cameroon: A pilot initiative and results for 2014-2016*. PLoS Neglected Tropical Diseases %@ 1935-2735 1935-2727, 2018. **12**(9).
13. Okoh, A.E.U.h.w.e.c.s.r.s.v., from=export, and id=L, *Investigation of possible rabies reservoirs in rodents in Nigeria*. International journal of zoonoses %@ 0377-0168, 1986. **13**(1): p. 1-5.
14. Mebatsion, T., et al., *Isolation and characterization of 115 street rabies virus isolates from Ethiopia by using monoclonal antibodies: Identification of 2 isolates as Mokola and Lagos bat viruses*. Journal of Infectious Diseases %@ 0022-1899, 1992. **166**(5): p. 972-977.
15. Oluwayelu, D.O., et al., *Lack of protection against rabies in neighbourhood dogs in some peri-urban and rural areas of Ogun and Oyo states, Nigeria*. African journal of medicine and medical sciences %@ 0309-3913, 2014. **43**: p. 157-162.
16. Sadeuh-Mba, S.A., et al., *Molecular characterization and phylogenetic relatedness of dog-derived Rabies Viruses circulating in Cameroon between 2010 and 2016*. PLoS Neglected Tropical Diseases %@ 1935-2735 1935-2727, 2017. **11**(10).
17. Badiali, L., et al., *A preliminary report on rabies in suspected equine encephalomyelitis cases in the United Arab Republic*. Bulletin of the World Health Organization %@ 0042-9686, 1966. **34**(5): p. 797-798.

18. Olugas, B.O., et al., *Prevalence of antibody against rabies among confined, free-roaming and stray dogs in a transit city of Nigeria*. *Veterinaria Italiana* %@ 0505-401X 1828-1427, 2011. **47**(4): p. 453-460.
19. Alabi, O., et al., *Profile of dog bite victims in Jos Plateau State, Nigeria: a review of dog bite records (2006-2008)*. *The Pan African medical journal* %@ 1937-8688, 2014. **18**: p. 12.
20. Randall, D.A., et al., *Rabies in endangered Ethiopian wolves*. *Emerging Infectious Diseases* %@ 1080-6040, 2004. **10**(12): p. 2214-2217.
21. Berentsen, A.R., et al., *Rabies, canine distemper, and canine parvovirus exposure in large carnivore communities from two zambian ecosystems*. *Vector-Borne and Zoonotic Diseases* %@ 1557-7759 1530-3667, 2013. **13**(9): p. 643-649.
22. Olugasa, B.O., et al., *Antibody levels against rabies among occupationally exposed individuals in a Nigerian University*. *Veterinaria italiana* %@ 1828-1427, 2010. **46**(1): p. 21-28.
23. Kitala, P.M., et al., *Community-based active surveillance for rabies in Machakos District, Kenya*. *Preventive Veterinary Medicine* %@ 0167-5877, 2000. **44**(1): p. 73-85.
24. Eze, U.U., et al., *Detection of lyssavirus antigen and antibody levels among apparently healthy and suspected rabid dogs in South-Eastern Nigeria*. *BMC research notes* %@ 1756-0500, 2018. **11**(1): p. 920.
25. Mebatsion, T., et al., *Detection of rabies antibody by ELISA and RFFIT in unvaccinated dogs and in the endangered Simien jackal (Canis simensis) of Ethiopia*. *Zentralblatt für Veterinärmedizin. Reihe B. Journal of veterinary medicine. Series B* %@ 0514-7166, 1992. **39**(3): p. 233-235.
26. Mshelbwala, P.P., A.B. Ogunkoya, and B.V.U.h.p.n.n.n.g.h.w.n.n.n.g.p.a.P.M.C. Maikai, *Detection of rabies antigen in the saliva and brains of apparently healthy dogs slaughtered for human consumption and its public health implications in abia state, Nigeria*. *ISRN veterinary science* %@ 2090-4452 2090-4460, 2013. **2013**: p. 468043-468043.
27. Aghomo, H.O., et al., *Detection of rabies virus antibodies in fruit bats (Eidolon helvum) from Nigeria*. *Journal of wildlife diseases* %@ 0090-3558, 1990. **26**(2): p. 258-261.
28. Ehimiyein, A.M., et al., *Efficacy of a direct rapid immunohistochemical test (DRIT) for rabies detection in Nigeria*. *African Journal of Biomedical Research* %@ 1119-5096, 2014. **17**(2): p. 101-107.
29. Sabeta, C.T., et al., *Emergence of rabies in the gauteng province, South Africa: 2010-2011*. *Journal of the South African Veterinary Association* %@ 2224-9435 1019-9128, 2013. **84**(1).
30. Dao, S., et al., *Epidemiological aspects of human and animal rabies in the urban area of Bamako, Mali*. *Bulletin de la Societe de Pathologie Exotique* %@ 0037-9085, 2006. **99**(3): p. 183-186.
31. Coetzer, A., et al., *Epidemiology of Rabies in Lesotho: The Importance of Routine Surveillance and Virus Characterization*. *Tropical medicine and infectious disease* %@ 2414-6366, 2017. **2**(3): p. 30.
32. Cleaveland, S., et al., *Estimating human rabies mortality in the United Republic of Tanzania from dog bite injuries*. *Bulletin of the World Health Organization* %@ 0042-9686, 2002. **80**(4): p. 304-310.
33. Kayali, U., et al., *Incidence of canine rabies in N'Djaména, Chad*. *Preventive Veterinary Medicine* %@ 0167-5877, 2003. **61**(3): p. 227-233.
34. Sadeuh-Mba, S.A., et al., *Laboratory data of dog rabies in southern Cameroon from 2010 to 2013*. *BMC research notes* %@ 1756-0500, 2014. **7**: p. 905.
35. Reynes, J.-M., et al., *Laboratory surveillance of rabies in humans, domestic animals, and bats in madagascar from 2005 to 2010*. *Advances in preventive medicine* %@ 2090-3499 2090-3480, 2011. **2011**: p. 727821-727821.
36. Punguyire, D.T., et al., *Level and pattern of human rabies and dog bites in techiman municipality in the middle belt of Ghana: A six year retrospective records review*. *Pan African Medical Journal* %@ 1937-8688, 2017. **28**.

37. Olarinmoye, A.O., et al., *Molecular detection of rabies virus strain with n-gene that clustered with china lineage 2 co-circulating with africa lineages in monrovia, liberia: First reported case in africa*. *Epidemiology and Infection* %@ 1469-4409 0950-2688, 2019. **147**.
38. Nakouné, E., et al., *New introduction and spread of rabies among dog population in Bangui*. *Acta Tropica* %@ 0001-706X 1873-6254, 2012. **123**(2): p. 107-110.
39. Twabela, A.T., et al., *Overview of animal rabies in Kinshasa province in the democratic republic of Congo*. *PLoS ONE* %@ 1932-6203, 2016. **11**(4).
40. De Benedictis, P., et al., *Phylogenetic analysis of rabies viruses from Burkina Faso, 2007*. *Zoonoses and Public Health* %@ 1863-1959 1863-2378, 2010. **57**(7): p. e42-e46.
41. Oelofsen, M.J., et al., *Rabies and bats in a rabies-endemic area of southern Africa: application of two commercial test kits for antigen and antibody detection*. *The Onderstepoort journal of veterinary research* %@ 0030-2465, 1993. **60**(3): p. 257-260.
42. Hambolu, S.E., et al., *Rabies and dog bites cases in lagos state Nigeria: a prevalence and retrospective studies (2006-2011)*. *Global journal of health science* %@ 1916-9736, 2014. **6**(1): p. 107-114.
43. Sillero-Zubiri, C., et al., *Rabies and mortality in Ethiopian wolves (Canis simensis)*. *Journal of wildlife diseases* %@ 0090-3558, 1996. **32**(1): p. 80-86.
44. Ehimiyein, A., et al., *Rabies cases in dog markets in Kaduna state, northern Nigeria*. *International Journal of Infectious Diseases* %@ 1201-9712, 2010. **14**: p. e476.
45. Ajayi, B.B., et al., *Rabies in apparently healthy dogs: histological and immunohistochemical studies*. *The Nigerian postgraduate medical journal* %@ 1117-1936, 2006. **13**(2): p. 128-134.
46. Alexander, K.A., et al., *Rabies in the Masai Mara, Kenya: preliminary report*. *The Onderstepoort journal of veterinary research* %@ 0030-2465, 1993. **60**(4): p. 411-414.
47. Cleaveland, S., et al., *A rabies serosurvey of domestic dogs in rural Tanzania: Results of a rapid fluorescent focus inhibition test (RFFIT) and a liquid-phase blocking ELISA used in parallel*. *Epidemiology and Infection* %@ 0950-2688, 1999. **123**(1): p. 157-164.
48. Munang'andu, H.M., et al., *Rabies status in Zambia for the period 1985-2004*. *Zoonoses and Public Health* %@ 1863-1959 1863-2378, 2011. **58**(1): p. 21-27.
49. Edward, F.D., et al., *A retrospective study of rabies cases at Techiman Municipal, Ghana, 2009-2012*. *International Journal of Infectious Diseases* %@ 1201-9712, 2014. **21**: p. 179.
50. Pfukenyi, D.M., et al., *A retrospective study of rabies in humans in Zimbabwe, between 1992 and 2003*. *Acta Tropica* %@ 0001-706X, 2007. **102**(3): p. 190-196.
51. Wosu, L.O., et al., *Seroepidemiological survey of rabies virus antibodies in non vaccinated dogs in Nsukka environs, Nigeria*. *Zentralblatt für Veterinärmedizin. Reihe B. Journal of veterinary medicine. Series B* %@ 0514-7166, 1990. **37**(1): p. 47-52.
52. Laurenson, K., et al., *Seroepidemiological survey of sympatric domestic and wild dogs (Lycaon pictus) in Tsumkwe District, north-eastern Namibia*. *The Onderstepoort journal of veterinary research* %@ 0030-2465, 1997. **64**(4): p. 313-316.
53. Alexander, K.A., et al., *Serologic survey of selected canine pathogens among free-ranging jackals in Kenya*. *Journal of wildlife diseases* %@ 0090-3558, 1994. **30**(4): p. 486-491.
54. Ogunkoya, A.B., et al., *Serological evidence of infection of dogs and man in Nigeria by lyssaviruses (family Rhabdoviridae)*. *Transactions of the Royal Society of Tropical Medicine and Hygiene* %@ 0035-9203, 1990. **84**(6): p. 842-845.
55. Tyem, D.A., et al., *Sero-Surveillance of Lyssavirus Specific Antibodies in Nigerian Fruit Bats (Eidolon helvum)*. *Tropical medicine and infectious disease* %@ 2414-6366, 2017. **2**(3): p. 26.
56. Creel, S., et al., *Serosurvey for selected viral diseases and demography of African wild dogs in Tanzania*. *Journal of wildlife diseases* %@ 0090-3558, 1997. **33**(4): p. 823-832.
57. Millán, J., et al., *Serosurvey of dogs for human, livestock, and wildlife pathogens, Uganda*. *Emerging Infectious Diseases* %@ 1080-6040 1080-6059, 2013. **19**(4): p. 680-682.
58. Grover, M., et al., *Spatiotemporal epidemiology of rabies at an interface between domestic dogs and wildlife in South Africa*. *Scientific reports* %@ 2045-2322, 2018. **8**(1): p. 10864.

59. Tricou, V., et al., *Surveillance of Canine Rabies in the Central African Republic: Impact on Human Health and Molecular Epidemiology*. PLoS Neglected Tropical Diseases 1935-2735 1935-2727, 2016. **10**(2).
60. Oluwayelu, D.O., et al., *A survey of rabies virus antibodies in confined, hunting and roaming dogs in Ogun and Oyo States, Southwestern Nigeria*. Asian Pacific Journal of Tropical Disease 2222-1808, 2015. **5**(1): p. 17-21.
61. Aworh, M.K., et al., *A Retrospective Study of Rabies Cases Reported at Vom Christian Hospital, Plateau State, Nigeria, 2006 – 2010*. Nigerian Veterinary Journal, 2011. **32**(4).
62. Baba, S.S., et al., *Serological Evidence Of Rabies Virus Infection Of Slaughter Camels (Camelus Dromedarius) Imported To Nigeria*. Tropical Veterinarian, 2005. **23**(3): p. 78-82.
63. Daniel, O.O., I.A. Adebowale, and G.O. Obokparo, *Survey of rabies virus antibodies in confined, hunting and roaming dogs in Ogun and Oyo states, Nigeria*. Bulletin of Animal Health and Production in Africa, 2014. **62**(1): p. 37-44.
64. Deressa, A., et al., *The status of rabies in Ethiopia: A retrospective record review*. Ethiopian Journal of Health Development, 2010. **24**(2).
65. Ehizibolo, D.O., et al., *Comparison of the Fluorescent Antibody Test and Direct Microscopic Examination for Rabies Diagnosis at the National Veterinary Research Institute, Vom, Nigeria*. African Journal of Biomedical Research, 2009. **12**(1): p. 73-76.
66. Garba, A., et al., *A comparative rabies laboratory diagnosis: Peculiar features of samples from apparently healthy dogs in Nigeria*. Sokoto Journal of Veterinary Sciences, 2008. **7**(1).
67. Isek, T.I., J.U. Umoh, and A.A. Dzikwi, *Detection of Rabies Antigen in the Brain Tissues of Apparently Healthy Dogs Slaughtered in Ogoja - Cross River State, Nigeria*. Nigerian Veterinary Journal, 2013. **34**(2).
68. Kia, G.S.N., et al., *Molecular characterization of a rabies virus isolated from trade dogs in Plateau State, Nigeria*. Sokoto Journal of Veterinary Sciences, 2018. **16**(2): p. 54-62.
69. Muhammad-Bashir, B., et al., *Prevalence and demographic distribution of canine rabies in Plateau State, Nigeria, 2004 – 2009*. Bulletin of Animal Health and Production in Africa, 2016. **64**(1): p. 129-138.
70. Nimzing, L. and Z. Nanbol, *Detection of Rabies antigen in brains of suspected Rabid dogs using Sellers staining technique and Enzyme Immunoassay*. Highland Medical Research Journal, 2003. **1**(4): p. 48-51.
71. Swai, E.S., et al., *Spatial and temporal distribution of rabies in northern Tanzania in the period of 1993-2002*. Tanzania Journal of Health Research, 2010. **12**(1): p. 80-85.
72. Tekki, I.S., et al., *Comparative assessment of seller's staining test (SST) and direct fluorescent antibody test for rapid and accurate laboratory diagnosis of rabies*. African Health Sciences, 2016. **16**(1): p. 123-127.
73. Ali, A., et al., *Overview of Rabies in and around Addis Ababa, in Animals Examined in EHNRI Zoonoses Laboratory Between, 2003 and 2009*. Ethiopian Veterinary Journal, 2010. **14**(2): p. 91-101.
