# Supplementary material for: Incidence and seroprevalence of rabies virus in humans, dogs and other animal species in Africa, a systematic review and meta-analysis
Source: PubMed Central journal article supplement — One Health. 2021 Jun 26;13:100285. doi: 10.1016/j.onehlt.2021.100285 (PMC8254041; doi:10.1016/j.onehlt.2021.100285), 2021-06-26
Supplement: mmc12.pdf [file mmc12.pdf]

Supplementary Table 6. Characteristics of included studies

| <b>Characteristics</b>                                | <b>Overall<br/>(142)</b> | <b>Humans<br/>(7)</b> | <b>Dogs (64)</b> | <b>Other animals<br/>(71)</b> |
|-------------------------------------------------------|--------------------------|-----------------------|------------------|-------------------------------|
| <b>Year of publication; range</b>                     | 1966-2019                | 1990-2018             | 1987-2019        | 1966-2019                     |
| <b>Period of inclusion of participants;<br/>range</b> | 1975-2018                | 1985-2016             | 1975-2018        | 1985-2017                     |
| <b>Study Design</b>                                   |                          |                       |                  |                               |
| Cohort (Baseline data)                                | 1 (0.7)                  | 1 (14.3)              |                  |                               |
| Community outbreak                                    | 5 (3.5)                  |                       | 4 (6.3)          | 1 (1.4)                       |
| Cross sectional                                       | 135 (95.1)               | 6 (85.7)              | 60 (92.7)        | 70 (98.6)                     |
| Hospital outbreak                                     | 1 (0.7)                  |                       |                  |                               |
| <b>Sampling</b>                                       |                          |                       |                  |                               |
| Non probabilistic                                     | 122 (85.9)               | 6 (85.7)              | 54 (84.4)        | 62 (87.3)                     |
| Probabilistic                                         | 20 (14.1)                | 1 (14.3)              | 10 (15.6)        | 9 (12.7)                      |
| <b>Number of sites</b>                                |                          |                       |                  |                               |
| Monocenter                                            | 58 (40.9)                | 3 (42.9)              | 31 (48.4)        | 24 (33.8)                     |
| Multicenter                                           | 78 (54.9)                | 4 (57.1)              | 31 (48.4)        | 43 (60.6)                     |
| Nationally representative                             | 4 (2.8)                  |                       | 1 (1.6)          | 3 (4.2)                       |
| Unclear/ Not reported                                 | 2 (1.4)                  |                       | 1 (1.6)          | 1 (1.4)                       |
| <b>Timing of data collection</b>                      |                          |                       |                  |                               |
| Prospectively                                         | 86 (60.6)                | 5 (71.4)              | 37 (57.8)        | 44 (62.0)                     |
| Retroprospectively                                    | 9 (6.3)                  |                       | 4 (6.3)          | 5 (7.0)                       |
| Retrospectively                                       | 39 (27.5)                | 2 (28.6)              | 15 (23.4)        | 22 (31.0)                     |
| Unclear/ Not reported                                 | 8 (5.6)                  |                       | 8 (12.5)         |                               |
| <b>UNSD Region</b>                                    |                          |                       |                  |                               |
| Central Africa                                        | 9 (6.3)                  | 1 (14.3)              | 6 (9.4)          | 2 (2.8)                       |
| Eastern Africa                                        | 61 (43.0)                | 3 (42.9)              | 19 (29.7)        | 39 (54.9)                     |
| Northern Africa                                       | 3 (2.1)                  |                       |                  | 3 (4.2)                       |
| Southern Africa                                       | 21 (14.8)                |                       | 4 (6.3)          | 17 (23.9)                     |
| West Africa                                           | 48 (33.8)                | 3 (42.9)              | 35 (54.7)        | 10 (14.1)                     |
| <b>Country</b>                                        |                          |                       |                  |                               |
| Burkina faso                                          | 1 (0.7)                  |                       |                  | 1 (1.4)                       |
| Cameroon                                              | 3 (2.1)                  | 1 (14.3)              | 2 (3.1)          |                               |
| Central African Republic                              | 2 (1.4)                  |                       | 2 (3.1)          |                               |
| Chad                                                  | 2 (1.4)                  |                       | 2 (3.1)          |                               |
| Democratic Republic of the Congo                      | 2 (1.4)                  |                       |                  | 2 (2.8)                       |
| Egypt                                                 | 3 (2.1)                  |                       |                  | 3 (4.2)                       |
| Ethiopia                                              | 17 (12.0)                |                       | 5 (7.8)          | 12 (16.9)                     |
| Ghana                                                 | 2 (1.4)                  |                       | 2 (3.1)          |                               |
| Ivory Coast                                           | 1 (0.7)                  | 1 (14.3)              |                  |                               |
| Kenya                                                 | 9 (6.3)                  |                       | 4 (6.3)          | 5 (7.0)                       |
| Liberia                                               | 1 (0.7)                  |                       | 1 (1.6)          |                               |
| Madagascar                                            | 9 (6.3)                  | 1 (14.3)              | 1 (1.6)          | 7 (9.9)                       |
| Mali                                                  | 1 (0.7)                  |                       | 1 (1.6)          |                               |
| Mozambique                                            | 2 (1.4)                  |                       |                  | 2 (2.8)                       |
| Namibia                                               | 12 (8.5)                 |                       | 2 (3.1)          | 10 (14.1)                     |
| Nigeria                                               | 42 (29.6)                | 2 (28.6)              | 31 (48.4)        | 9 (12.7)                      |
| South Africa                                          | 9 (6.3)                  |                       | 2 (3.1)          | 7 (9.9)                       |
| Tanzania                                              | 8 (5.6)                  |                       | 5 (7.8)          | 3 (4.2)                       |
| Uganda                                                | 1 (0.7)                  |                       | 1 (1.6)          |                               |
| Zambia                                                | 10 (7.0)                 | 1 (14.3)              | 2 (3.1)          | 7 (9.9)                       |
| Zimbabwe                                              | 5 (3.5)                  | 1 (14.3)              | 1 (1.6)          | 3 (4.2)                       |
| <b>%Male, Range</b>                                   | 16-80.8                  | 38-71.4               | 16-80.8          | 47-81                         |
| <b>Age (years); Median [IQR]</b>                      | 30 [30-30]               | NA                    | 30 [30-30]       | NA                            |

| <b>Characteristics</b>                                        | <b>Overall<br/>(142)</b> | <b>Humans<br/>(7)</b> | <b>Dogs (64)</b> | <b>Other animals<br/>(71)</b> |
|---------------------------------------------------------------|--------------------------|-----------------------|------------------|-------------------------------|
| <b>Age range</b>                                              |                          |                       |                  |                               |
| All ages                                                      | 14 (9.9)                 | 2 (28.6)              | 10 (15.6)        | 2 (2.8)                       |
| Children                                                      | 2 (1.4)                  |                       | 2 (3.1)          |                               |
| Unclear/Not reported                                          | 126 (88.7)               | 5 (71.4)              | 52 (81.3)        | 69 (97.2)                     |
| <b>Recruitment setting</b>                                    |                          |                       |                  |                               |
| Rural                                                         | 18 (12.7)                | 1 (14.3)              | 10 (15.6)        | 7 (9.9)                       |
| Unclear/Not reported                                          | 61 (43.0)                | 4 (57.1)              | 19 (29.7)        | 38 (53.5)                     |
| Urban                                                         | 35 (24.7)                | 1 (14.3)              | 13 (20.3)        | 21 (29.6)                     |
| Urban/rural                                                   | 28 (19.7)                | 1 (14.3)              | 22 (34.4)        | 5 (7.0)                       |
| <b>Setting</b>                                                |                          |                       |                  |                               |
| Community-based                                               | 90 (63.4)                | 3 (42.9)              | 48 (75.0)        | 49 (69.0)                     |
| Hospital-based                                                | 6 (4.2)                  |                       |                  |                               |
| Hospital/community based                                      | 5 (3.5)                  | 1 (14.3)              |                  |                               |
| Unclear/Not reported                                          | 41 (28.9)                | 3 (42.9)              | 16 (25.0)        | 22 (31.0)                     |
| <b>Hospitalization</b>                                        |                          |                       |                  |                               |
| Hospitalized                                                  | 0 (0.0)                  |                       |                  |                               |
| Not applicable (if not in the hospital)                       | 136 (95.8)               |                       | 64 (100.0)       | 71 (100.0)                    |
| Unclear/Not reported                                          | 6 (4.2)                  | 7 (100.0)             |                  |                               |
| <b>Sample types</b>                                           |                          |                       |                  |                               |
| Brain                                                         | 82 (57.8)                | 2 (28.6)              | 36 (56.3)        | 44 (62.0)                     |
| Oral swabs                                                    | 2 (1.4)                  |                       |                  | 2 (2.8)                       |
| Saliva                                                        | 1 (0.7)                  |                       | 1 (1.6)          |                               |
| Saliva, Skin biopsy                                           | 2 (1.4)                  | 2 (28.6)              |                  |                               |
| Serum                                                         | 41 (28.9)                | 2 (28.6)              | 24 (37.5)        | 15 (21.1)                     |
| Skin biopsy, Brain, Cerebrospinal fluid                       | 1 (0.7)                  | 1 (14.3)              |                  |                               |
| Unclear/Not reported                                          | 13 (9.2)                 |                       | 3 (4.7)          | 10 (14.1)                     |
| <b>Detection assay</b>                                        |                          |                       |                  |                               |
| Classical RT-PCR                                              | 6 (4.2)                  | 2 (28.6)              | 1 (1.6)          | 3 (4.2)                       |
| Complement fixation test                                      | 1 (0.7)                  |                       |                  | 1 (1.4)                       |
| Direct ELISA                                                  | 1 (0.7)                  |                       |                  | 1 (1.4)                       |
| Direct fluorescent antibody test                              | 82 (57.8)                | 3 (42.9)              | 32 (50.0)        | 47 (66.2)                     |
| Direct fluorescent antibody test; Rapid Immunodiagnostic Test | 1 (0.7)                  |                       | 1 (1.6)          |                               |
| Direct Rapid Immunohistochemistry Test                        | 8 (5.6)                  |                       | 4 (6.3)          | 4 (5.6)                       |
| Haemagglutination-inhibition technique                        | 1 (0.7)                  |                       | 1 (1.6)          |                               |
| Indirect ELISA                                                | 16 (11.3)                | 1 (14.3)              | 12 (18.8)        | 3 (4.2)                       |
| Mouse inoculation test                                        | 2 (1.4)                  |                       |                  | 2 (2.8)                       |
| Mouse inoculation test + Seller's staining test               | 2 (1.4)                  |                       |                  | 2 (2.8)                       |
| Neutralization test                                           | 1 (0.7)                  |                       |                  | 1 (1.4)                       |
| Rapid fluorescent focus inhibition test                       | 15 (10.6)                | 1 (14.3)              | 9 (14.1)         | 5 (7.0)                       |
| Seller's staining test                                        | 6 (4.2)                  |                       | 4 (6.3)          | 2 (2.8)                       |
| <b>Target detected</b>                                        |                          |                       |                  |                               |
| Antibodies                                                    | 33 (23.2)                | 2 (28.6)              | 22 (34.4)        | 9 (12.7)                      |
| Antigen                                                       | 93 (65.5)                | 3 (42.9)              | 37 (57.8)        | 53 (74.7)                     |
| Negri bodies                                                  | 8 (5.6)                  |                       | 4 (6.3)          | 4 (5.6)                       |
| RNA                                                           | 6 (4.2)                  | 2 (28.6)              | 1 (1.6)          | 3 (4.2)                       |
| Virus                                                         | 2 (1.4)                  |                       |                  | 2 (2.8)                       |
| <b>Infection Status</b>                                       |                          |                       |                  |                               |
| Current contact                                               | 109 (76.8)               | 5 (71.4)              | 42 (65.6)        | 62 (87.3)                     |
| Past contact                                                  | 33 (23.2)                | 2 (28.6)              | 22 (34.4)        | 9 (12.7)                      |
| <b>Order</b>                                                  |                          |                       |                  |                               |
| Artiodactyla                                                  | 20 (14.1)                |                       |                  | 20 (28.2)                     |
| Carnivora                                                     | 19 (13.4)                |                       |                  | 19 (26.8)                     |
| Chiroptera                                                    | 13 (9.2)                 |                       |                  | 13 (18.3)                     |

| <b>Characteristics</b>               | <b>Overall<br/>(142)</b> | <b>Humans<br/>(7)</b> | <b>Dogs (64)</b> | <b>Other animals<br/>(71)</b> |
|--------------------------------------|--------------------------|-----------------------|------------------|-------------------------------|
| Multiple animals                     | 8 (5.6)                  |                       |                  | 8 (11.3)                      |
| Perissodactyla                       | 7 (4.9)                  |                       |                  | 7 (9.9)                       |
| Primates                             | 2 (1.4)                  |                       |                  | 2 (2.8)                       |
| Rodentia                             | 2 (1.4)                  |                       |                  | 2 (2.8)                       |
| NA                                   | 71 (50.0)                |                       |                  |                               |
| <b>Species</b>                       |                          |                       |                  |                               |
| Dogs                                 | 64 (45.1)                |                       |                  |                               |
| Humans                               | 7 (4.9)                  |                       |                  |                               |
| Other animals                        | 71 (50.0)                |                       |                  |                               |
| <b>Humans characteristics</b>        |                          |                       |                  |                               |
| Apparently healthy subjects          | 2 (28.6)                 | 2 (28.6)              |                  |                               |
| RABV suspected humans cases          | 5 (71.4)                 | 5 (71.4)              |                  |                               |
| <b>Dogs characteristics</b>          |                          |                       |                  |                               |
| Dogs unspecified                     | 20 (31.3)                |                       | 20 (31.3)        |                               |
| Owner dogs                           | 19 (29.7)                |                       | 19 (29.7)        |                               |
| RABV suspected case Owner dogs       | 1 (1.6)                  |                       | 1 (1.6)          |                               |
| RABV suspected case stray dogs       | 1 (1.6)                  |                       | 1 (1.6)          |                               |
| RABV suspected case unspecified dogs | 8 (9.4)                  |                       | 8 (9.4)          |                               |
| Stray dogs                           | 11 (17.2)                |                       | 11 (17.2)        |                               |
| Wild dogs                            | 4 (6.3)                  |                       | 4 (6.3)          |                               |
| <b>Others animals species</b>        |                          |                       |                  |                               |
| Bats                                 | 13 (18.3)                |                       |                  | 13 (18.3)                     |
| Bovines                              | 5 (7.0)                  |                       |                  | 5 (7.0)                       |
| Camels                               | 1 (1.4)                  |                       |                  | 1 (1.4)                       |
| Cats                                 | 7 (9.9)                  |                       |                  | 7 (9.9)                       |
| Cattle                               | 2 (2.8)                  |                       |                  | 2 (2.8)                       |
| Cattles                              | 2 (2.8)                  |                       |                  | 2 (2.8)                       |
| Cows                                 | 1 (1.4)                  |                       |                  | 1 (1.4)                       |
| Donkeys                              | 3 (4.2)                  |                       |                  | 3 (4.2)                       |
| Eland                                | 1 (1.4)                  |                       |                  | 1 (1.4)                       |
| Equine                               | 2 (2.8)                  |                       |                  | 2 (2.8)                       |
| Feline                               | 2 (2.8)                  |                       |                  | 2 (2.8)                       |
| Goats                                | 2 (2.8)                  |                       |                  | 2 (2.8)                       |
| Horse                                | 2 (2.8)                  |                       |                  | 2 (2.8)                       |
| Hyenas                               | 3 (4.2)                  |                       |                  | 3 (4.2)                       |
| Jackals                              | 3 (4.2)                  |                       |                  | 3 (4.2)                       |
| Kudu                                 | 1 (1.4)                  |                       |                  | 1 (1.4)                       |
| Lemur                                | 1 (1.4)                  |                       |                  | 1 (1.4)                       |
| Mongoses                             | 1 (1.4)                  |                       |                  | 1 (1.4)                       |
| Monkeys                              | 1 (1.4)                  |                       |                  | 1 (1.4)                       |
| Multiple animals                     | 8 (11.3)                 |                       |                  | 8 (11.3)                      |
| Panthera leo                         | 1 (1.4)                  |                       |                  | 1 (1.4)                       |
| Pigs                                 | 1 (1.4)                  |                       |                  | 1 (1.4)                       |
| Rats                                 | 1 (1.4)                  |                       |                  | 1 (1.4)                       |
| Sheeps                               | 2 (2.8)                  |                       |                  | 2 (2.8)                       |
| Shoats                               | 1 (1.4)                  |                       |                  | 1 (1.4)                       |
| Squirrel                             | 1 (1.4)                  |                       |                  | 1 (1.4)                       |
| Wildebeest                           | 1 (1.4)                  |                       |                  | 1 (1.4)                       |
| Wolves                               | 2 (2.8)                  |                       |                  | 2 (2.8)                       |
| <b>Risk of bias</b>                  |                          |                       |                  |                               |
| High risk of bias                    | 1 (0.7)                  |                       | 1 (1.6)          |                               |
| Low risk of bias                     | 2 (1.4)                  | 2 (28.6)              |                  |                               |
| Moderate risk of bias                | 139 (97.9)               | 5 (71.4)              | 63 (98.4)        | 71 (100.0)                    |
