# Supplementary material for: Incidence and seroprevalence of rabies virus in humans, dogs and other animal species in Africa, a systematic review and meta-analysis
Source: PubMed Central journal article supplement — One Health. 2021 Jun 26;13:100285. doi: 10.1016/j.onehlt.2021.100285 (PMC8254041; doi:10.1016/j.onehlt.2021.100285), 2021-06-26
Supplement: mmc14.pdf [file mmc14.pdf]

|                                         | Prevalence. %<br>(95%CI) | 95% Prediction<br>interval | N<br>Studies | N<br>Participants | H (95%CI)     | I <sup>2</sup> (95%CI) | P<br>heterogeneity | P difference<br>subtypes |
|-----------------------------------------|--------------------------|----------------------------|--------------|-------------------|---------------|------------------------|--------------------|--------------------------|
| Ghana                                   | 14.6 [11.8-17.7]         | NA                         | 1            | 561               | NA            | NA                     | 1                  |                          |
| Nigeria                                 | 10.5 [3.2-20.9]          | [0-55.8]                   | 6            | 693               | 3.5 [2.6-4.8] | 92 [85.3-95.6]         | < 0.001            |                          |
| <b>Past contact</b>                     |                          |                            |              |                   |               |                        |                    |                          |
| <b>Stray dogs</b>                       |                          |                            |              |                   |               |                        |                    |                          |
| <b>Sampling</b>                         |                          |                            |              |                   |               |                        |                    | 0.47                     |
| Non probabilistic                       | 20.9 [2.6-49.7]          | [0-100]                    | 3            | 522               | 6.7 [4.8-9.2] | 97.7 [95.7-98.8]       | < 0.001            |                          |
| Probabilistic                           | 7.7 [0-30.1]             | NA                         | 1            | 13                | NA            | NA                     | 1                  |                          |
| <b>Wild dogs</b>                        |                          |                            |              |                   |               |                        |                    |                          |
| <b>Timing of data collection</b>        |                          |                            |              |                   |               |                        |                    | 0.958                    |
| Prospectively                           | 0 [0-8]                  | NA                         | 1            | 21                | NA            | NA                     | 1                  |                          |
| Retroprospectively                      | 0 [0-9.3]                | NA                         | 1            | 18                | NA            | NA                     | 1                  |                          |
| <b>UNSD Region</b>                      |                          |                            |              |                   |               |                        |                    | < 0.001                  |
| Eastern Africa                          | 0 [0-4.9]                | NA                         | 2            | 39                | 1             | 0                      | 0.958              |                          |
| West Africa                             | 24.1 [13.9-36.1]         | NA                         | 1            | 58                | NA            | NA                     | 1                  |                          |
| <b>Country</b>                          |                          |                            |              |                   |               |                        |                    | < 0.001                  |
| Kenya                                   | 0 [0-9.3]                | NA                         | 1            | 18                | NA            | NA                     | 1                  |                          |
| Nigeria                                 | 24.1 [13.9-36.1]         | NA                         | 1            | 58                | NA            | NA                     | 1                  |                          |
| Tanzania                                | 0 [0-8]                  | NA                         | 1            | 21                | NA            | NA                     | 1                  |                          |
| <b>Recruitment setting</b>              |                          |                            |              |                   |               |                        |                    | 0.003                    |
| Rural                                   | 0 [0-9.3]                | NA                         | 1            | 18                | NA            | NA                     | 1                  |                          |
| Urban/rural                             | 24.1 [13.9-36.1]         | NA                         | 1            | 58                | NA            | NA                     | 1                  |                          |
| <b>RABV prevalence in other animals</b> |                          |                            |              |                   |               |                        |                    |                          |
| <b>Current contact</b>                  |                          |                            |              |                   |               |                        |                    |                          |
| <b>Perissodactyla</b>                   |                          |                            |              |                   |               |                        |                    |                          |
| <b>Timing of data collection</b>        |                          |                            |              |                   |               |                        |                    | 0.994                    |
| Prospectively                           | 84.4 [47.6-100]          | [0-100]                    | 5            | 102               | 4 [2.9-5.4]   | 93.7 [88.1-96.6]       | < 0.001            |                          |
| Retrospectively                         | 84.7 [68.9-96]           | NA                         | 2            | 38                | 1.1           | 20.7                   | 0.262              |                          |
| <b>UNSD Region</b>                      |                          |                            |              |                   |               |                        |                    | 0.958                    |
| Eastern Africa                          | 84.7 [68.9-96]           | NA                         | 2            | 38                | 1.1           | 20.7                   | 0.262              |                          |



|                                  | Prevalence. %<br>(95%CI) | 95% Prediction<br>interval | N<br>Studies | N<br>Participants | H (95%CI)     | I <sup>2</sup> (95%CI) | P<br>heterogeneity | P difference<br>subtypes |
|----------------------------------|--------------------------|----------------------------|--------------|-------------------|---------------|------------------------|--------------------|--------------------------|
| Rural                            | 1.6 [0-8.9]              | NA                         | 2            | 43                | 1             | 0                      | 0.357              |                          |
| Urban                            | 71.5 [59.8-82]           | [29.5-98.9]                | 9            | 1634              | 4 [3.2-5]     | 93.6 [90-95.9]         | < 0.001            |                          |
| <b>Carnivora</b>                 |                          |                            |              |                   |               |                        |                    |                          |
| <b>Study Design</b>              |                          |                            |              |                   |               |                        |                    | 0.011                    |
| Community outbreak               | 86.7 [63.9-99.7]         | NA                         | 1            | 15                | NA            | NA                     | 1                  |                          |
| Cross sectional                  | 48.9 [31.8-66.2]         | [0-100]                    | 14           | 731               | 4.5 [3.8-5.3] | 95 [93.1-96.4]         | < 0.001            |                          |
| <b>Sampling</b>                  |                          |                            |              |                   |               |                        |                    | 0.329                    |
| Non probabilistic                | 47.7 [28.7-67]           | [0-100]                    | 12           | 673               | 4.8 [4-5.7]   | 95.7 [93.9-96.9]       | < 0.001            |                          |
| Probabilistic                    | 66.3 [34.4-92.1]         | [0-100]                    | 3            | 73                | 2.7 [1.6-4.5] | 85.8 [58.5-95.1]       | 0.001              |                          |
| <b>Timing of data collection</b> |                          |                            |              |                   |               |                        |                    | 0.006                    |
| Prospectively                    | 45.1 [22.4-68.9]         | [0-100]                    | 8            | 347               | 4.3 [3.4-5.4] | 94.5 [91.4-96.6]       | < 0.001            |                          |
| Retroprospectively               | 90 [72.2-99.8]           | NA                         | 1            | 20                | NA            | NA                     | 1                  |                          |
| Retrospectively                  | 53.2 [29-76.7]           | [0-100]                    | 6            | 379               | 4.3 [3.3-5.6] | 94.6 [90.7-96.8]       | < 0.001            |                          |
| <b>UNSD Region</b>               |                          |                            |              |                   |               |                        |                    | 0.084                    |
| Eastern Africa                   | 59.9 [41.1-77.4]         | [2.5-100]                  | 10           | 509               | 3.9 [3.2-4.9] | 93.6 [90.2-95.8]       | < 0.001            |                          |
| Southern Africa                  | 37.2 [4.9-77.7]          | [0-100]                    | 4            | 224               | 5.9 [4.4-7.8] | 97.1 [94.9-98.4]       | < 0.001            |                          |
| West Africa                      | 23.1 [3.6-50.4]          | NA                         | 1            | 13                | NA            | NA                     | 1                  |                          |
| <b>Country</b>                   |                          |                            |              |                   |               |                        |                    | < 0.001                  |
| Ethiopia                         | 74.4 [56-89.3]           | [2.2-100]                  | 4            | 291               | 2.8 [1.8-4.3] | 87.3 [69.5-94.7]       | < 0.001            |                          |
| Madagascar                       | 23.6 [13.2-35.9]         | NA                         | 1            | 55                | NA            | NA                     | 1                  |                          |
| Mozambique                       | 90 [72.2-99.8]           | NA                         | 1            | 20                | NA            | NA                     | 1                  |                          |
| Namibia                          | 71.6 [35.7-96.6]         | NA                         | 2            | 162               | 4.3 [2.4-7.5] | 94.6 [83.3-98.2]       | < 0.001            |                          |
| Nigeria                          | 23.1 [3.6-50.4]          | NA                         | 1            | 13                | NA            | NA                     | 1                  |                          |
| South Africa                     | 6.7 [0-23.5]             | NA                         | 2            | 62                | 1.7 [1-3.7]   | 67.1 [0-92.6]          | 0.081              |                          |
| Tanzania                         | 50 [18.9-81.1]           | NA                         | 1            | 10                | NA            | NA                     | 1                  |                          |
| Zambia                           | 32.5 [22.6-43.2]         | NA                         | 1            | 80                | NA            | NA                     | 1                  |                          |
| Zimbabwe                         | 51.4 [29.5-73]           | NA                         | 2            | 53                | 1.5 [1-3.1]   | 57.3 [0-89.8]          | 0.126              |                          |
| <b>Recruitment setting</b>       |                          |                            |              |                   |               |                        |                    | 0.351                    |
| Rural                            | 86.7 [63.9-99.7]         | NA                         | 1            | 15                | NA            | NA                     | 1                  |                          |
| Urban                            | 64.8 [44.4-82.8]         | [3.4-100]                  | 6            | 365               | 3.6 [2.7-4.9] | 92.4 [86.2-95.8]       | < 0.001            |                          |
| Urban/rural                      | 72.2 [64-79.7]           | NA                         | 1            | 126               | NA            | NA                     | 1                  |                          |

|                                  | Prevalence. %<br>(95%CI) | 95% Prediction<br>interval | N<br>Studies | N<br>Participants | H (95%CI)     | I <sup>2</sup> (95%CI) | P<br>heterogeneity | P difference<br>subtypes |
|----------------------------------|--------------------------|----------------------------|--------------|-------------------|---------------|------------------------|--------------------|--------------------------|
| <b>Chiroptera</b>                |                          |                            |              |                   |               |                        |                    |                          |
| <b>Sampling</b>                  |                          |                            |              |                   |               |                        |                    | 0.133                    |
| Non probabilistic                | 0 [0-0]                  | [0-0]                      | 8            | 5081              | 1 [1-1]       | 0 [0-0]                | 0.991              |                          |
| Probabilistic                    | 6.4 [0-33.2]             | NA                         | 2            | 75                | 2.9 [1.5-5.6] | 87.8 [52.7-96.8]       | 0.004              |                          |
| <b>UNSD Region</b>               |                          |                            |              |                   |               |                        |                    | 0.605                    |
| Central Africa                   | 0 [0-0.8]                | NA                         | 1            | 218               | NA            | NA                     | 1                  |                          |
| Eastern Africa                   | 0 [0-0.1]                | [0-0.2]                    | 4            | 3966              | 1 [1-1]       | 0 [0-0]                | 0.996              |                          |
| Southern Africa                  | 0 [0-0]                  | NA                         | 2            | 547               | 1             | 0                      | 0.423              |                          |
| West Africa                      | 2.6 [0-19.7]             | [0-100]                    | 3            | 425               | 3.9 [2.5-6.1] | 93.6 [84.6-97.3]       | < 0.001            |                          |
| <b>Country</b>                   |                          |                            |              |                   |               |                        |                    | 0.605                    |
| Democratic Republic of the Congo | 0 [0-0.8]                | NA                         | 1            | 218               | NA            | NA                     | 1                  |                          |
| Madagascar                       | 0 [0-0.1]                | [0-0.2]                    | 4            | 3966              | 1 [1-1]       | 0 [0-0]                | 0.996              |                          |
| Nigeria                          | 2.6 [0-19.7]             | [0-100]                    | 3            | 425               | 3.9 [2.5-6.1] | 93.6 [84.6-97.3]       | < 0.001            |                          |
| South Africa                     | 0 [0-0]                  | NA                         | 2            | 547               | 1             | 0                      | 0.423              |                          |
| <b>Sample types</b>              |                          |                            |              |                   |               |                        |                    | 0.158                    |
| Brain                            | 0 [0-0]                  | [0-0]                      | 5            | 1140              | 1 [1-1.2]     | 0 [0-30.8]             | 0.878              |                          |
| Oral swabs                       | 0 [0-0.1]                | NA                         | 2            | 2486              | 1             | 0                      | 1                  |                          |
| Serum                            | 1.3 [0-5.9]              | [0-100]                    | 3            | 1530              | 4.2 [2.8-6.4] | 94.4 [87-97.6]         | < 0.001            |                          |
| <b>Past contact</b>              |                          |                            |              |                   |               |                        |                    |                          |
| <b>Carnivora</b>                 |                          |                            |              |                   |               |                        |                    |                          |
| <b>Timing of data collection</b> |                          |                            |              |                   |               |                        |                    | 0.039                    |
| Prospectively                    | 14.3 [0.2-39.8]          | [0-100]                    | 4            | 80                | 2.5 [1.6-4]   | 84.1 [59.9-93.7]       | < 0.001            |                          |
| Retroprospectively               | 0 [0-2.4]                | NA                         | 1            | 72                | NA            | NA                     | 1                  |                          |
| Retrospectively                  | 3.6 [0-14.7]             | NA                         | 1            | 28                | NA            | NA                     | 1                  |                          |
| <b>Country</b>                   |                          |                            |              |                   |               |                        |                    | 0.03                     |
| Ethiopia                         | 16.6 [4.6-32.8]          | NA                         | 2            | 30                | 1             | 0                      | 0.652              |                          |
| Kenya                            | 0.6 [0-7.1]              | NA                         | 2            | 100               | 1.5 [1-3.1]   | 56.5 [0-89.5]          | 0.129              |                          |
| Zambia                           | 12.8 [0-69.1]            | NA                         | 2            | 50                | 4.2 [2.4-7.4] | 94.3 [82.3-98.2]       | < 0.001            |                          |
| <b>Sample types</b>              |                          |                            |              |                   |               |                        |                    | 0.228                    |
| Brain                            | 20 [3-44.6]              | NA                         | 1            | 15                | NA            | NA                     | 1                  |                          |

|                    | <b>Prevalence. %<br/>(95%CI)</b> | <b>95% Prediction<br/>interval</b> | <b>N<br/>Studies</b> | <b>N<br/>Participants</b> | <b>H (95%CI)</b> | <b>I<sup>2</sup> (95%CI)</b> | <b>P<br/>heterogeneity</b> | <b>P difference<br/>subtypes</b> |
|--------------------|----------------------------------|------------------------------------|----------------------|---------------------------|------------------|------------------------------|----------------------------|----------------------------------|
| Serum              | 6.2 [0-22]                       | [0-80]                             | 5                    | 165                       | 2.7 [1.8-4]      | 86.5 [70.6-93.8]             | < 0.001                    |                                  |
| <b>Chiroptera</b>  |                                  |                                    |                      |                           |                  |                              |                            |                                  |
| <b>UNSD Region</b> |                                  |                                    |                      |                           |                  |                              |                            | 0.348                            |
| Southern Africa    | 0 [0-0.9]                        | NA                                 | 1                    | 190                       | NA               | NA                           | 1                          |                                  |
| West Africa        | 0.9 [0-6.7]                      | NA                                 | 2                    | 229                       | 2.3 [1.1-4.8]    | 81.2 [19.9-95.6]             | 0.021                      |                                  |
| <b>Country</b>     |                                  |                                    |                      |                           |                  |                              |                            | 0.348                            |
| Nigeria            | 0.9 [0-6.7]                      | NA                                 | 2                    | 229                       | 2.3 [1.1-4.8]    | 81.2 [19.9-95.6]             | 0.021                      |                                  |
| South Africa       | 0 [0-0.9]                        | NA                                 | 1                    | 190                       | NA               | NA                           | 1                          |                                  |

RABV: Rabies virus; CI: confidence interval; NA: not applicable; UNSD: United Nations Statistics Division.
