# Supplementary figures and images for: Incidence and seroprevalence of rabies virus in humans, dogs and other animal species in Africa, a systematic review and meta-analysis
Source: PubMed Central journal article supplement — One Health. 2021 Jun 26;13:100285. doi: 10.1016/j.onehlt.2021.100285 (PMC8254041; doi:10.1016/j.onehlt.2021.100285), 2021-06-26

# Supplementary Figure 1: Seroprevalence of Rabies virus infections in dogs in Africa

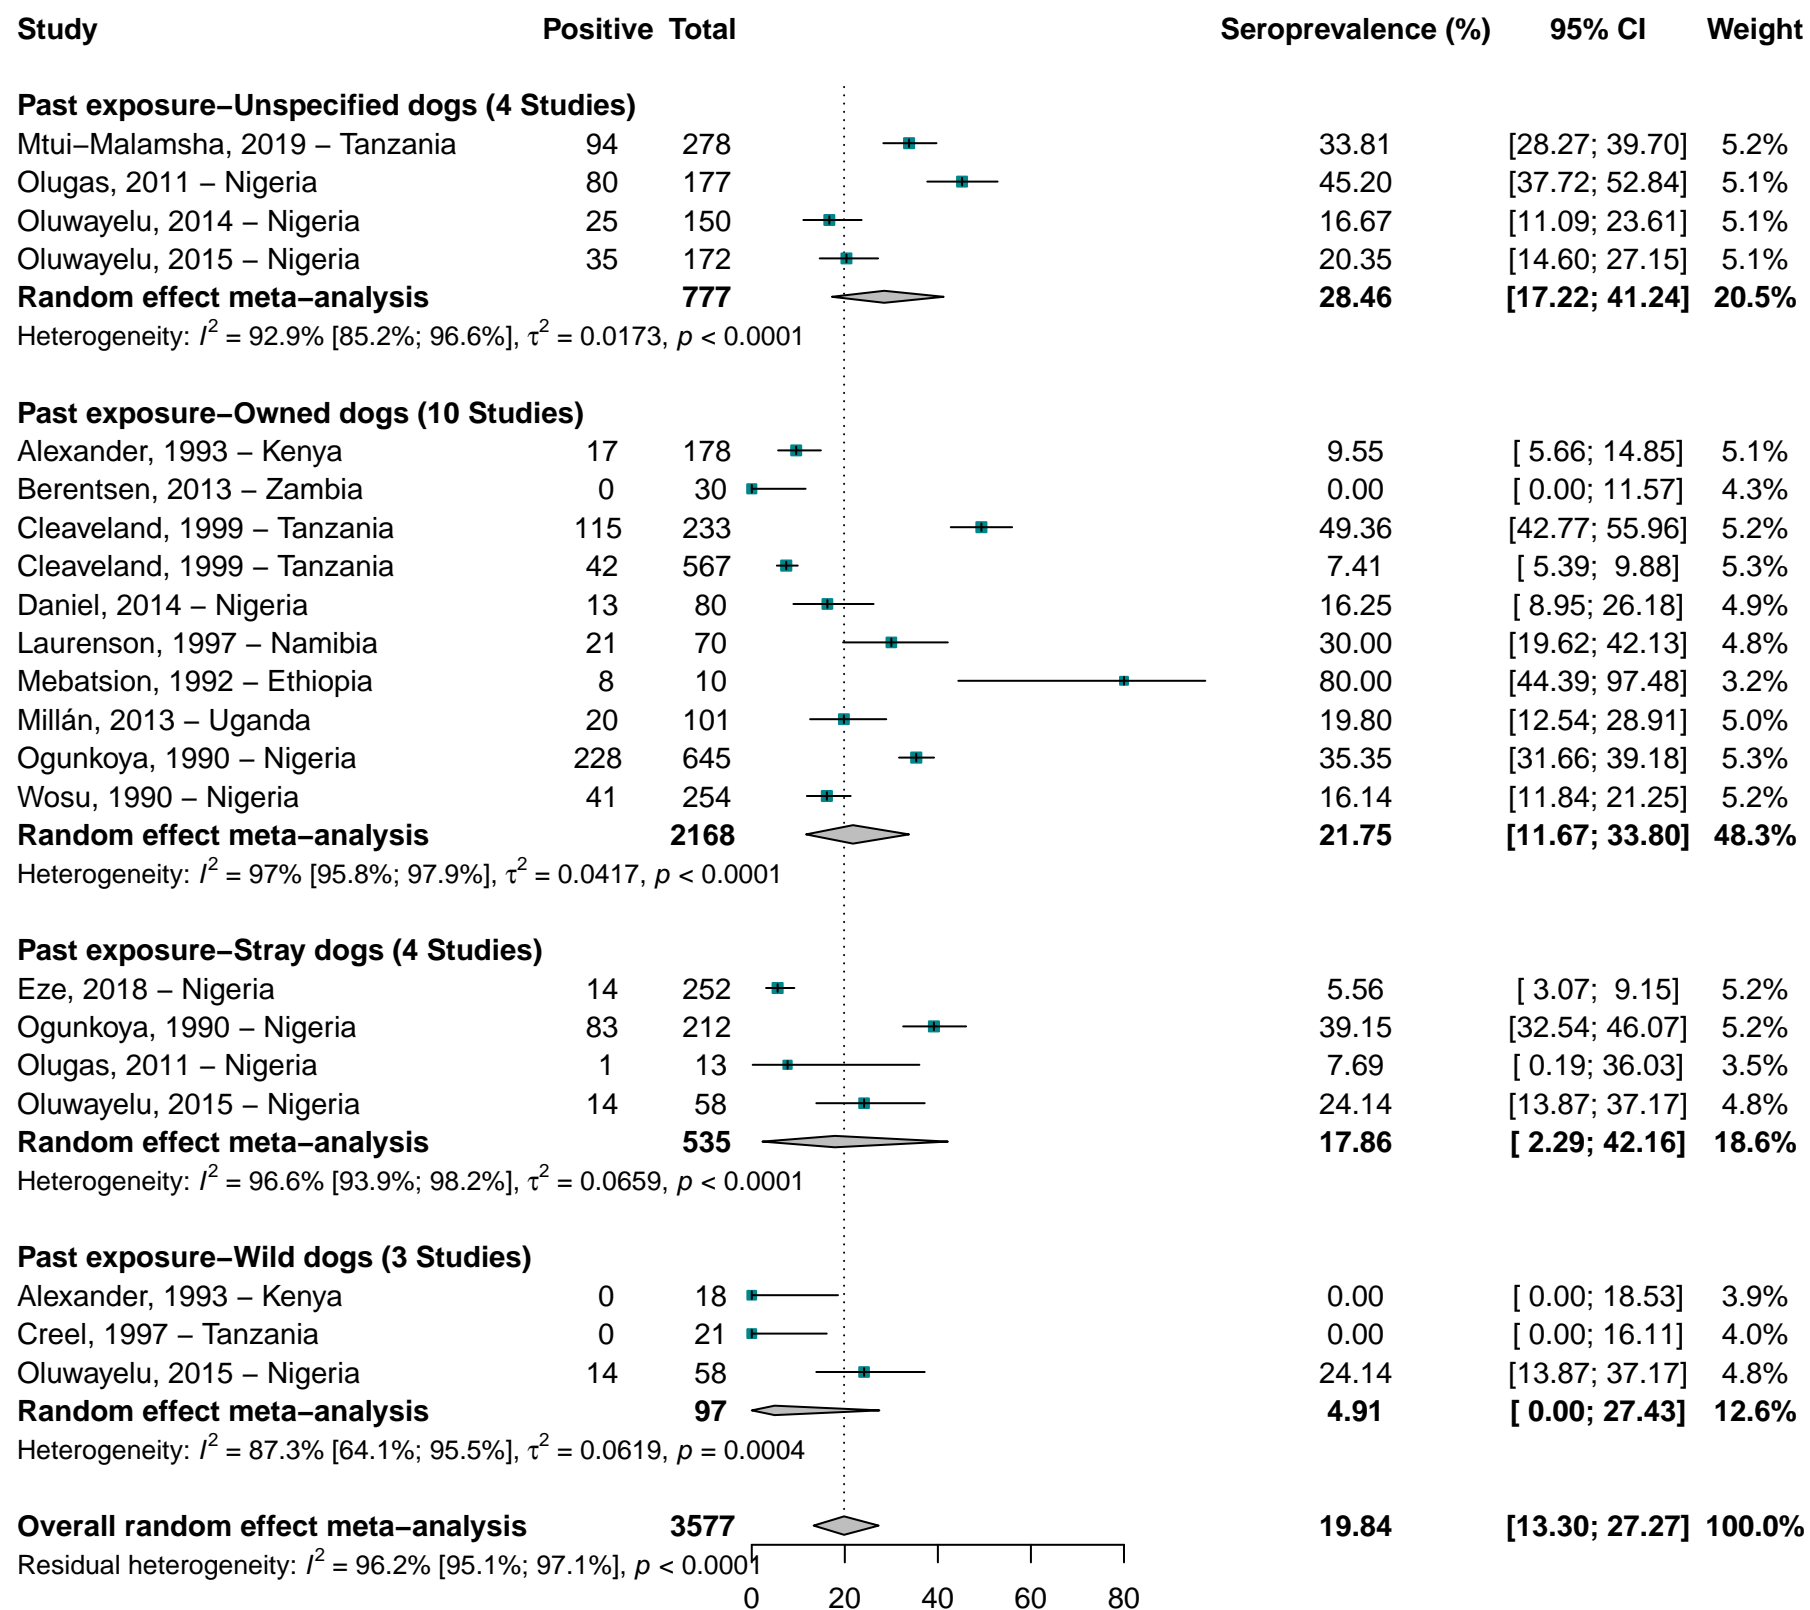

Supplement: mmc1.pdf [file mmc1.pdf]

**Supplementary Figure 2: Incidence of Rabies virus infections in other animal species in Africa**

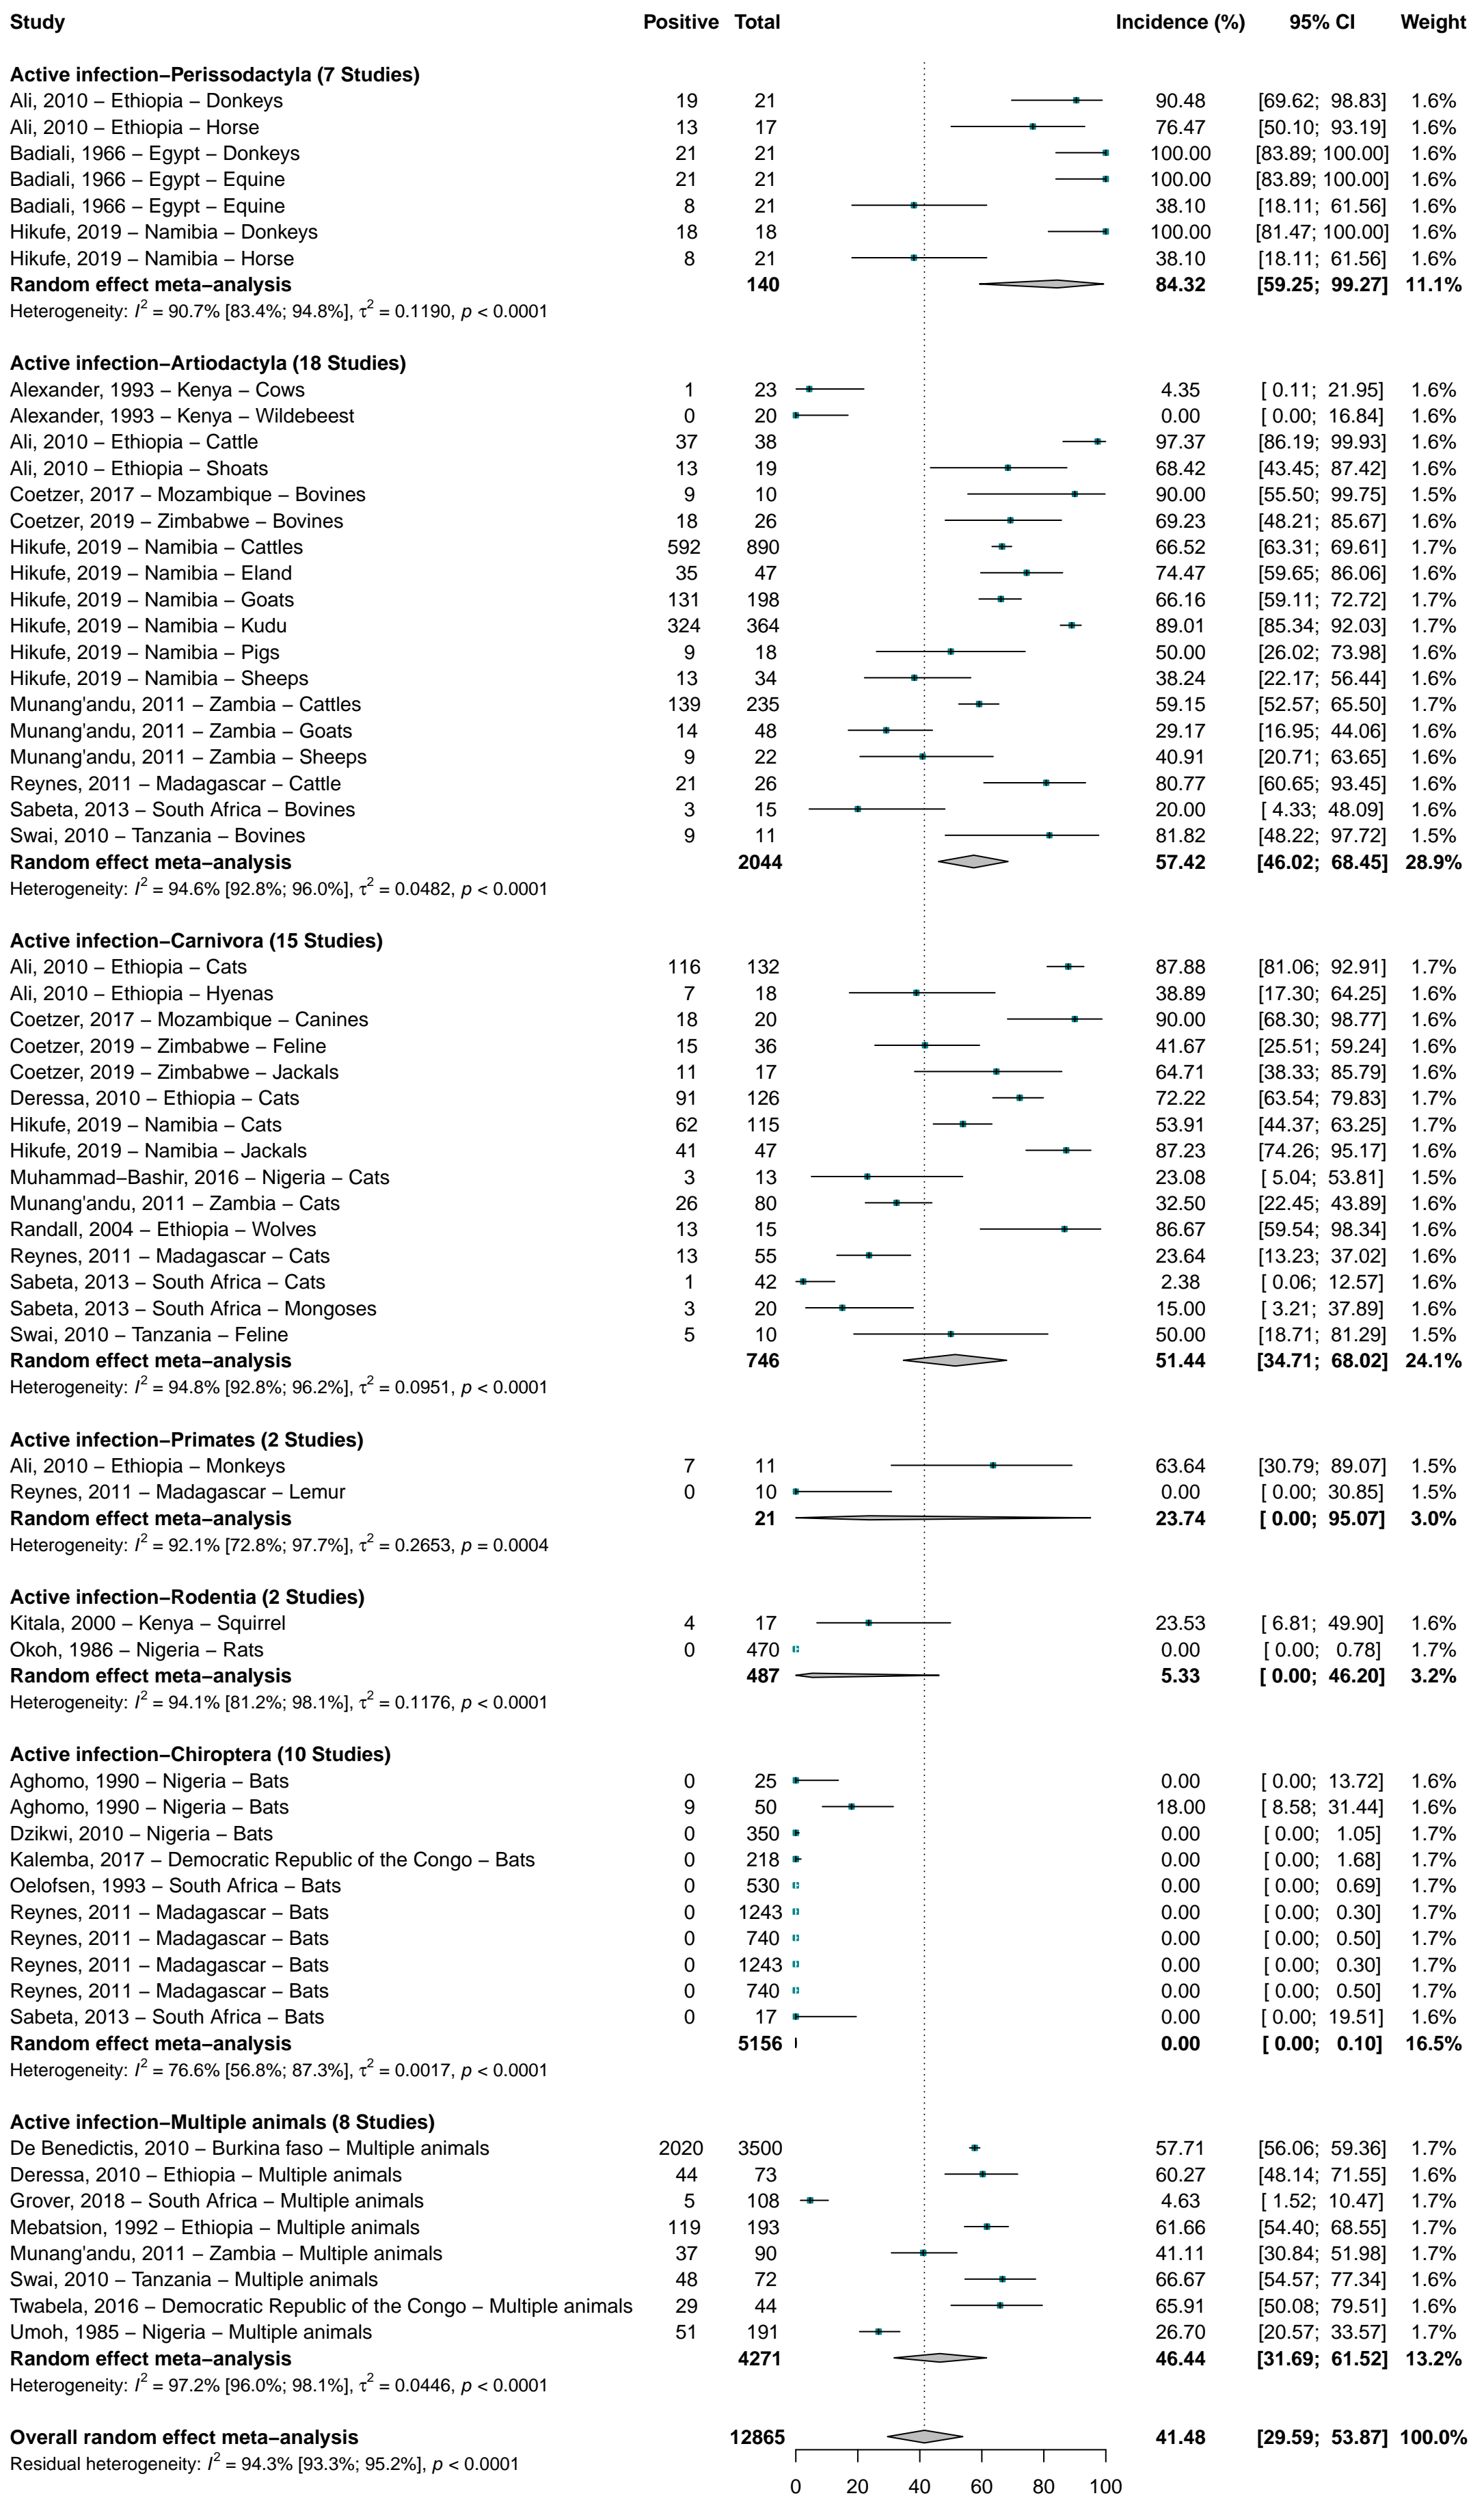

Supplement: mmc2.pdf [file mmc2.pdf]
